# Supplementary material
Source: publisher figshare collection journal article supplement (https://gsapubs.figshare.com/articles/dataset/_/13548998)
Supplement: Supplementary file 1 [file 1]

## Sheet: Table S5
Supplemental Material for Ocampo-Díaz, Y.Z.E., Torres-Sánchez, S.A., Augustsson, C., Macías, J.L., Sosa-Ceballos, G., Cisneros-Máximo, G., García-Sánchez, L.,
Osorio-Ocampo, S., Avellan, D.R., Omma, J., Ortega-Obregón, C., Solari, L.A., and González-Barba, G., 2020, Provenance of the El Salto Formation (early Oligocene
to early Miocene), southern part of La Reforma caldera, Baja California Sur, Mexico, in Martens, U.C., and Molina Garza, R.S., eds., Southern and Central Mexico:
Basement Framework, Tectonic Evolution, and Provenance of Mesozoic–Cenozoic Basins: GSA Special Paper 546, p. 1–32, https://doi. org/10.1130/2020.2546(11).
	Table S5: TRACE ELEMENT COMPOSITION OF DETRIAL AND MAGMATIC ZIRCON ANALYZED AT THE CENTRO DE GEOCIENCIAS, UNIVERSIDAD NACIONAL AUTÓNOMA DE MÉXICO
	Spot Name	La	Ce	Pr	Nd	Sm	Eu	Gd	Tb	Dy	Ho	Er	Yb	Lu	P	Ti	Y	Nb	Hf	Pb	Th	U	Sc	Th/U	log10(U/Yb)	log10(Nb/Yb)	Eu/Eu*
	Sample: Yaq-SO-26 (Granitic rock)
	Zircon-01	0	8.07	0.012	0.45	1.35	0.72	8.2	3.1	41.7	17.8	91	240	59.1	50	6	563	0.84	16300	2.975	67.6	195	23	0.346667	-0.090177	-2.45593	0.661312
	Zircon-02	0	11	0.072	1.05	2.77	1.07	16.4	4.51	62	21.3	99	240	55.9	40	4.1	690	0.85	15800	2.525	75	139	26	0.539568	-0.237196	-2.45079	0.485143
	Zircon-03	0	10.6	0.031	0.88	2.08	0.97	12	4.13	55.2	23.9	114	301	73	230	5.8	742	0.89	15400	4.025	126	263	25	0.479087	-0.058611	-2.52918	0.593331
	Zircon-04	0	16.3	0.057	0.54	1.83	0.68	12.4	4.77	61.7	26.5	135	354	82.9	140	6.8	855	1.92	15100	5.15	140	343	26	0.408163	-0.013709	-2.2657	0.436234
	Zircon-05	0	8.78	0.016	0.44	1.22	0.54	8.9	2.8	40.2	17.4	88.8	237	58.8	300	5	570	0.88	17000	3.5	74.5	214	18	0.348131	-0.044335	-2.43027	0.500802
	Zircon-06	0	9	0.038	0.49	1.91	0.76	10.7	3.56	46.6	19.8	99	253	59.6	220	4.7	626	0.77	14500	3.05	79	197	22	0.401015	-0.108654	-2.51663	0.513751
	Zircon-07	0	25.1	0.053	0.71	2.05	0.9	17.5	5.9	77	33.8	171	417	100	70	5.8	1090	3.14	15800	9.75	265	580	24	0.456897	0.143292	-2.12321	0.459192
	Zircon-08	0	11.7	0.027	0.68	1.65	0.78	12.3	4.31	56.5	23.8	120	305	71.6	420	4.9	766	1.15	14600	4.625	117	305	22	0.383607	0	-2.4236	0.529112
	Zircon-09	0.392	135	3.41	53.2	74.2	26.8	281	78	751	251	1000	1770	347	900	14	7420	5.94	11850	20.675	2040	1420	53	1.43662	-0.095685	-2.47419	0.567188
	Zircon-10	0.0032	20.1	0.029	0.86	1.94	0.95	14.3	5.26	71.3	30.7	152	368	85.6	150	5.4	966	1.89	13700	5.475	186	369	23	0.504065	0.001179	-2.28939	0.551191
	Zircon-11	13.5	39.3	3.2	13.4	3.6	0.97	11.7	4.1	52.9	22.2	108	276	64.4	2380	4.8	719	1.41	12500	3.75	104.5	248	19	0.421371	-0.046457	-2.29169	0.456746
	Zircon-12	0	10.2	0.042	0.58	1.76	0.76	10.8	3.8	48.7	20.3	103	265	62.6	790	4.6	663	1.01	11100	4.15	105	265	19	0.396226	0	-2.41893	0.532712
	Zircon-13	0	9.1	0.032	0.6	1.46	0.67	9.9	3.45	42.5	18.3	92	240	57.6	810	4	588	0.72	11500	3.225	90	208	19	0.432692	-0.062148	-2.52288	0.538553
	Zircon-14	0.094	8.4	0.108	1.41	2.82	1	12.4	3.87	47.5	18.8	90	207	47.7	1000	4.1	587	0.72	11390	2.4	80.7	154	18	0.524026	-0.12845	-2.45864	0.516788
	Zircon-15	1.2	8.8	0.3	1.48	1.51	0.54	7.5	2.42	31.1	12.5	63.2	170	40.7	1130	4.5	411	0.585	11490	1.975	50.1	128	18	0.391406	-0.123239	-2.46329	0.490368
	Zircon-16	0	4.39	0.036	0.38	0.94	0.418	5.48	2.1	28	11.3	58.5	159	36.8	510	3.6	366	0.53	12300	1.64	35.7	96	16	0.371875	-0.219126	-2.47712	0.56282
	Zircon-17	0.021	9.43	0.046	0.57	1.42	0.55	7.49	2.78	36.4	16.1	84.4	222	54	360	4.1	528	1.16	12860	2.8175	74.9	188	11	0.398404	-0.072195	-2.2819	0.515377
	Zircon-18	0	14.1	0.041	0.88	2.1	0.86	13.9	5.09	57.5	24.9	122	298	70.9	460	4.6	785	1.39	13400	4.675	144	301	13	0.478405	0.00435	-2.3312	0.48644
	Zircon-19	0	12.8	0.03	0.62	1.8	0.55	12.3	4.62	56.7	23.7	117.1	294	68.9	700	2	756	1.02	15570	4.775	119	298	12	0.399329	0.005869	-2.45975	0.357208
	Zircon-20	0	19.9	0.02	0.68	2.5	0.69	16.9	6.31	79	33.4	156	392	93	1700	8.5	1020	1.87	16400	5.375	180	421	34	0.427553	0.030996	-2.32144	0.324402
	Zircon-21	0	6.47	0.027	0.27	0.97	0.55	7.5	2.78	35.1	14.6	75.8	195	48.6	16000	2.3	461	0.66	13300	2.35	60.2	156	21	0.385897	-0.09691	-2.47049	0.623151
	Zircon-22	0	8.72	0.023	0.51	1.46	0.724	10.1	3.37	44.9	18.7	92.7	251	59.9	-13100	1.89	609	0.78	15260	3.0875	81.8	209	9.9	0.391388	-0.079527	-2.50758	0.576168
	Zircon-23	0.66	9	0.188	1.24	1.5	0.68	10.1	3.57	41	17	82.7	213	51.2	-6500	5.7	550	0.86	12660	2.425	69.1	154	12	0.448701	-0.140859	-2.39388	0.533888
	Zircon-24	7.8	25.8	2.04	8.3	2.34	0.71	8.7	2.97	37.5	15.9	82.3	211	50.4	-12800	4.5	511	0.76	14580	2.725	70	184	9.9	0.380435	-0.059465	-2.44347	0.480882
	Zircon-25	0	7.38	0.034	0.46	1.21	0.476	6.88	2.65	34.7	14.6	75.4	200	46.7	-1200	2.5	468	0.71	13970	2.625	66.7	163	9.8	0.409202	-0.088842	-2.44977	0.504159
	Zircon-26	0.184	12.3	0.075	0.46	1.47	0.6	9.4	3.94	47.5	20	99	243	57.4	-200	7.6	615	1.05	13310	4	123	264	11	0.465909	0.035998	-2.36442	0.49326
	Zircon-27	0.0012	23.7	0.045	0.97	2.4	0.91	18.7	7.16	93	38.8	187	422	95.6	-1190	2.8	1224	2.06	12300	6.65	230	426	11	0.539906	0.004097	-2.31144	0.415109
	Zircon-28	6	28.1	1.35	7.4	5.6	1.71	23.7	7.44	84.1	31.4	147	334	72	-3000	3.8	963	0.93	13770	4.7	188	314	9	0.598726	-0.026817	-2.55526	0.453602
	Zircon-29	0.311	102.2	2.51	35.5	45.3	17.19	163.9	46.5	482	167.5	728	1464	307	-2420	10.9	5160	5.1	9260	22.075	2050	1432	22	1.43156	-0.009598	-2.45797	0.609656
	Zircon-30	0	7.65	0.032	0.5	1.29	0.462	6.35	2.55	33.2	15.09	75.7	199	48.6	-260	3	480	0.567	12760	2.77	65.8	174	8.5	0.378161	-0.058304	-2.54527	0.493296
	Zircon-31	0.38	17.6	0.171	2.24	2.77	1.85	18.4	6.07	72.1	29.6	143	352	79.4	-360	21.1	920	0.88	14200	5.45	158	327	22	0.48318	-0.031995	-2.60206	0.7919
	Zircon-32	0	7.09	0.025	0.33	1	0.295	6.06	2.52	31.1	12.95	66	175	42.4	60	2.9	419	0.65	13940	2.5725	55.2	158	7.9	0.349367	-0.044381	-2.43012	0.366212
	Zircon-33	0	7.18	0.034	0.55	1.12	0.522	7.52	2.55	31.3	14	71.2	185	46.5	120	3.9	442	0.61	12940	2.3425	62	160	8.3	0.3875	-0.063052	-2.48184	0.549667
	Zircon-34	0.0029	10.13	0.034	1.12	2.45	0.92	12.6	4.61	55.4	23.1	110.9	270	62.9	40	3.2	734	1.13	13390	4.075	121.4	265	11	0.458113	-0.008118	-2.37828	0.506019
	Zircon-35	0.035	10.3	0.061	1	2.28	0.99	13.2	4.72	54.7	22.8	111	251	57.9	-90	4.7	725	1.23	10470	3.15	124	200	11	0.62	-0.098644	-2.30977	0.551478
	Sample: Yaq-55 (El Salto Formation rhyolite)
	Zircon-36	0.18	10.85	0.12	1.04	1.84	0.5	11.3	3.81	48	19.1	93	222	48.9	1100	3.8	634	1.08	10800	1.1	151	331	­	0.456193	0.173475	-2.31293	0.335096
	Zircon-37	0.053	12.5	0.287	3.78	5.55	1.74	22.9	7.07	77.3	28.7	142	341	78.4	800	2.3	957	1.58	9550	1.50625	358	452	­	0.792035	0.122384	-2.3341	0.471664
	Zircon-38	0.155	28.5	0.079	0.81	2.2	0.556	15.1	6.1	86.2	37	188.6	445	97	170	-0.000194	1169	3.96	9720	0.321875	174	307	­	0.566775	-0.161222	-2.05066	0.294797
	Zircon-39	0.121	31.5	0.289	5.33	9.88	3.74	47	16.4	188	71.6	327	677	138	1390	3.2	2160	2.15	7840	0.32875	343	362	­	0.947514	-0.27188	-2.49815	0.530386
	Zircon-40	0.234	20.1	0.286	4.76	8.13	2.02	35.9	11.45	124.9	44.7	191	335	65.8	-150	8.9	1309	1.63	9610	0.475625	224	206	­	1.08738	-0.211178	-2.31286	0.361332
	Zircon-41	0.075	41.5	0.785	13.7	23	9.67	100.6	30.8	321	112.7	472	820	163.9	1270	11.1	4080	2.18	7590	0.223125	283	221	­	1.28054	-0.569422	-2.57536	0.614343
	Zircon-42	0.51	30.5	0.233	3.25	6.28	2.54	36.6	12.43	155	61.5	289	594	125.4	890	11.4	1840	2.94	8450	0.259375	198	224	­	0.883929	-0.423538	-2.30544	0.511989
	Zircon-43	13.7	64.5	6.91	39	12.7	1.45	23.4	6.52	72.5	28	133.3	292	61.4	5400	8.3	857	1.2	10280	0.65	92	191	­	0.481675	-0.184349	-2.3862	0.257043
	Zircon-44	0.218	4.69	0.235	3.81	7.77	0.89	37.5	11.6	131	48.6	203	354	70.7	660	-0.000184	1310	1.16	8610	0.64625	95	179	­	0.530726	-0.29615	-2.48454	0.159335
	Zircon-45	0.27	20.1	0.149	1.84	3.66	1.41	20.1	7.08	87.4	34.3	165.2	352	74.2	130	8.5	1066	1.72	9160	0.181875	116	172	­	0.674419	-0.311014	-2.31101	0.502375
	Zircon-46	0.183	45.4	0.468	6.1	10.9	4.8	59.3	20.8	253	95	424	840	173	1700	10.3	3020	3.41	9100	0.35375	256	256	­	1	-0.516039	-2.39153	0.576963
	Zircon-47	12	78	3.7	15.7	4.49	1.15	13.6	4.73	58.1	24	121.6	300	66.9	1400	4.6	756	4.04	10320	31	345	520	­	0.663462	0.238882	-1.87074	0.449731
	Zircon-48	0.034	28.6	0.368	7.83	12.42	5.25	60.3	19	208	74.4	324	587	116	1200	6.9	2180	2.27	6690	0.158125	174	153	­	1.13725	-0.583947	-2.41261	0.586256
	Zircon-49	0.63	10.34	0.796	6.87	8.8	3.4	29.5	9.31	90.2	27.3	113.8	263	61.3	10	66	844	2.02	8970	17.375	59	335	­	0.176119	0.105089	-2.1146	0.644873
	Zircon-50	0.005	16.5	0.064	1.19	2.83	1.1	18.4	6.16	82.3	34.3	171	387	82.3	1100	-0.000158	1078	2.21	9510	0.19625	108	198	­	0.545455	-0.291046	-2.24332	0.465841
	Zircon-51	9.3	34.5	1.88	9.5	5.01	1.4	18.1	6.01	69.6	27.7	134	333	74.6	1700	4.8	878	2.18	10610	1.88125	441	576	­	0.765625	0.237978	-2.18399	0.44928
	Zircon-52	0.074	23.2	0.139	2.37	4.76	1.87	26.8	9.5	114	43.4	213	440	94.7	900	3.4	1320	1.55	9210	0.216875	133	179	­	0.743017	-0.3906	-2.45312	0.505962
	Zircon-53	0.82	22	0.288	2.82	3.32	0.83	20.4	6.9	76.6	28	127	260	50.4	1780	20.4	861	2.91	11370	3.7	508	1903	­	0.266947	0.864465	-1.95108	0.308206
	Zircon-54	0.0042	17.7	0.025	0.8	1.87	0.378	12.1	4.37	57.9	24.2	119.9	263	56.6	1400	6.8	761	1.83	9490	0.200625	100	155	­	0.645161	-0.229624	-2.15751	0.242843
	Zircon-55	0.7	10	0.328	3.27	4.62	0.95	20.7	7.5	82	32	148	334	71.1	-930	1.4	994	1.41	8720	2.49375	301	685	­	0.439416	0.311944	-2.37453	0.296869
	Zircon-56	0.014	7.72	0.084	1.61	3.23	1.33	16.68	5.98	70.5	27.3	135	301	66.8	500	3.7	889	1.33	8010	0.91875	122	226	­	0.539823	-0.124458	-2.35472	0.553732
	Zircon-57	0.5	50.3	0.408	5.02	9.8	4.41	58.8	20.7	234	88	390	739	146	700	14.5	2980	4.11	8880	0.334375	278	260	­	1.06923	-0.453671	-2.2548	0.561415
	Zircon-58	0.017	27.7	0.245	5	9.49	3.59	44.2	14.66	171.2	64.5	287	565	116	-70	10.7	1850	1.91	8470	0.2475	156	189	­	0.825397	-0.475587	-2.47101	0.53567
	Zircon-59	3.46	19.4	0.89	4.17	2.25	0.445	9.29	3.43	43	16.96	82.8	186.3	40.4	490	0.8	517	1.19	9980	0.6575	86	171	­	0.502924	-0.037217	-2.19467	0.297446
	Zircon-60	0.369	42	0.414	4.8	14.1	4.24	85	33.1	406	149	637	1127	212	1800	12.1	5720	6.36	8600	0.40875	340	359	­	0.947075	-0.496829	-2.24847	0.374278
	Zircon-61	10.1	41.7	2.36	9.4	4.21	1.1	17.6	5.29	66.6	26	120.7	254	54.5	1500	6	778	2.27	9370	0.738125	119	187	­	0.636364	-0.132992	-2.04881	0.39052
	Zircon-62	2.03	35.6	0.65	6.5	8.7	3.52	48.8	17.1	215	81.3	374	754	152	800	177	2400	4.14	7890	0.34375	353	307	­	1.14984	-0.390233	-2.26037	0.52206
	Zircon-63	7.7	49.1	2.29	10.7	4.6	0.54	27.2	10.9	143	59	273	540	112	2180	12.5	1700	6.46	9420	3.85625	276	459	­	0.601307	-0.070581	-1.92216	0.147529
	Zircon-64	0.139	78	0.75	11.2	20.6	6.78	93.5	29.6	339	121	519	968	185	1800	-0.0002	4390	5.57	7720	0.396875	268	241	­	1.11203	-0.603858	-2.24002	0.472104
	Zircon-65	0.013	42.7	0.142	2.14	4.85	1.78	32.1	11.73	148.5	60.6	289	625	128	600	4.9	1830	4.84	10040	0.384375	202	306	­	0.660131	-0.310159	-2.11104	0.435957
	Sample: Yaq-26-5 (EL Salto Formation sandstone)
	Zircon-01	0	9.05	0.06	1.32	4.57	1.1	30.1	10.11	118.9	45.4	193	350	70.5	-20	10.1	1295	0.59	11620	2.5225	83.6	153	8.9	0.546405	-0.359377	-2.77322	0.286615
	Zircon-02	0	14.03	0.088	1.96	5.69	0.93	34.3	11.2	127.4	47	206	369	70.5	330	6.6	1404	0.7	12840	3.3275	153.3	207	6.5	0.74058	-0.251056	-2.72193	0.203436
	Zircon-03	0	2.48	0.044	1	2.11	0.93	13.1	4.68	57.4	23.2	108	246	53.5	-40	7.5	711	0.664	8770	1.3625	29.4	85	8.6	0.345882	-0.461516	-2.56877	0.540572
	Zircon-04	8.6	37	2.2	10.9	6.2	1.27	21.2	7.23	85.7	33.1	156.3	349	74.9	-900	7.2	1056	1.09	11210	6.525	299	483	6.5	0.619048	0.141122	-2.5054	0.338522
	Zircon-05	0.016	7.39	0.063	1.36	2.81	0.76	13.2	4.59	55.7	22.7	110.8	249	54.8	-130	6.9	718	0.65	10940	4.95	141	306	8.9	0.460784	0.089522	-2.58329	0.381348
	Zircon-06	15	48	6.2	28	9.2	1.6	16	5	44	18	81	181	40.4	-7100	3.6	530	0.7	10920	1.7025	72	126	10	0.571429	-0.157308	-2.41258	0.403008
	Zircon-07	0.013	16.24	0.162	3.03	7.2	1.26	34.9	11.37	129	47.9	206	370	73.4	50	7.7	1419	1.06	10570	2.3275	164	226	9.4	0.725664	-0.214093	-2.5429	0.242906
	Zircon-08	0	6.72	0.009	0.19	0.55	0.212	3.67	1.34	18.4	7.68	41.4	119.7	29.8	190	2.4	266	0.473	15590	1.7525	33.7	101	7	0.333663	-0.073773	-2.40323	0.456004
	Zircon-09	0.0021	7.64	0.217	3.47	4.63	1.68	19.8	6.64	76.2	29.7	141.7	319	67.5	70	8.4	956	0.519	10080	2.7925	130.6	179.2	6.1	0.728795	-0.250453	-2.78862	0.536208
	Zircon-10	0	5.53	0.052	1.5	4.02	0.791	26	9.13	118.1	47.7	217	431	88.7	-150	6.7	1417	0.684	10580	2.075	71.4	123.2	6.6	0.579545	-0.543867	-2.79942	0.236442
	Zircon-11	0.032	11.25	0.325	5.61	9.48	1.68	50.8	16.9	199	74.2	317	537	106.7	-80	12.4	2180	1.11	9840	9.075	280	366	7.4	0.765027	-0.166493	-2.68465	0.233949
	Zircon-12	0.48	38.7	0.27	3.9	8.4	0.27	51.8	19.2	239	95	432	790	153	100	192	2710	16.9	11100	6.4	660	1090	11	0.605505	0.139799	-1.66974	0.039555
	Zircon-13	0	4.37	0.041	0.91	2.2	0.494	15.45	5.71	74.5	30.8	141.4	292	62.9	150	12.8	923	0.83	10060	0.9475	24.8	58.5	9.1	0.423932	-0.698227	-2.5463	0.25894
	Zircon-14	0	14.9	0.134	3.06	6.1	1.53	33.3	11.2	141	57.9	269	531	108	140	7.6	1780	1.42	12340	3.6	214	278	9.4	0.769784	-0.28105	-2.57281	0.328059
	Zircon-15	0	10.2	0.028	1.21	2.17	0.83	12.1	3.7	44.6	17.9	83.4	199	46.5	220	3.6	565	0.75	12710	2.7825	98	208	7.6	0.471154	0.01921	-2.42379	0.494997
	Zircon-16	0	5.38	0.024	1.09	2.05	0.393	13.25	4.88	56.5	21.72	98.7	190.3	41.4	-300	12.1	650	0.87	9090	1.2125	41.4	83.9	7.5	0.493445	-0.355677	-2.33992	0.230439
	Zircon-17	0	0.98	0.069	1.27	5	0.182	37.6	18.3	254	105.4	502	1036	209	-1310	7.8	3220	1.78	11250	12.8	55.2	483	36	0.114286	-0.331413	-2.76494	0.040564
	Zircon-18	0	6.75	0.022	0.42	1.12	0.54	7.15	2.64	34	14.1	72.5	182	44.7	50	5.1	466	0.579	10100	1.6575	49.3	98.8	6.3	0.498988	-0.265314	-2.49739	0.583149
	Zircon-19	0	6.84	0.018	0.245	0.46	0.189	3.32	1.27	15.5	7.04	35.7	96.2	24.1	210	1.8	232	0.7	12060	2.17	39.5	134.3	6.2	0.294118	0.144901	-2.13808	0.467371
	Zircon-20	0	1.55	0.0078	0.22	0.59	0.352	3.96	1.5	16.7	7.04	37.1	103.4	27.2	260	6.3	237	0.379	8760	0.8325	17.2	56.8	7.3	0.302817	-0.260172	-2.43588	0.703747
	Zircon-21	0.017	63.8	0.112	2.02	6.31	0.92	41.5	16.6	216	90.7	443	974	206	-460	3.4	2960	8.1	12810	6.625	804	1250	10	0.6432	0.108351	-2.08007	0.173739
	Zircon-22	0	8.27	0.024	0.65	0.77	0.412	5.52	2.1	28.7	11.4	57.5	155	37.2	40	5.4	372	0.63	10320	2.765	101.4	201	7.8	0.504478	0.112864	-2.39099	0.610703
	Zircon-23	0.011	15.6	0.096	2.67	9.1	0.337	57.4	19.8	230	82.9	346	560	103.9	-30	3.3	2250	4.83	9820	2.4975	255	513	6.4	0.497076	-0.038071	-2.06424	0.045061
	Zircon-24	0	3.19	0.0065	0.184	0.39	0.216	2.61	1.09	13.7	6.19	32	91.4	22.1	50	4.4	207	0.348	9610	0.9375	26.3	64.1	5.5	0.410296	-0.154088	-2.41937	0.654257
	Zircon-25	0	6.09	0.027	0.5	1.25	0.294	9.32	3.52	46.3	18.9	88.3	178.7	36.3	-230	7.9	568	0.527	10950	0.87	23.5	53.6	8	0.438433	-0.52296	-2.53031	0.263228
	Zircon-26	0.34	13.7	0.063	0.76	0.97	0.6	6.3	2.44	28.2	11	53	144	37.6	270	1.42	378	0.84	11480	6.125	113	491	9.3	0.230143	0.532719	-2.23408	0.741724
	Zircon-27	0	20.6	0.03	0.55	1.23	0.721	9.54	3.11	40.3	15.83	75	185.2	46.3	-60	1.94	541	1.69	11720	8.85	220	748	8.4	0.294118	0.606261	-2.03975	0.643215
	Zircon-28	0	6.68	0.077	1.1	2.28	0.382	12.8	3.98	48.7	18.72	85.4	166.9	33.8	180	15.7	574	0.549	10120	1.115	43.2	73.3	7.5	0.589359	-0.357352	-2.48288	0.216092
	Zircon-29	0	4.01	0	0.29	0.83	0.26	5.97	2.44	31.6	12.8	66.2	163	38.1	20	4.5	420	0.523	10330	2.2975	42.3	140.7	6.1	0.30064	-0.063894	-2.49369	0.356939
	Zircon-30	0	10.24	0.08	1.36	2.55	0.78	14.7	4.78	56.6	23.6	114.4	276	62.9	110	6	755	0.96	10400	3.8	154	288	6	0.534722	0.018483	-2.45864	0.389326
	Zircon-31	0	4.96	0.024	0.61	2.11	0.417	12.25	4.14	49.8	19.1	85.6	168	34.8	160	9.1	581	0.493	8760	0.805	27.8	49	6	0.567347	-0.535113	-2.53246	0.250654
	Zircon-32	0	1.66	0.025	0.46	1.39	0.06	12.1	4.86	63.8	25.9	119.4	233	47.5	-200	3.2	764	1.46	9740	2.7175	42	168	11	0.25	-0.142047	-2.203	0.044709
	Zircon-33	0	12.46	0.119	2.46	4.88	0.95	25.2	7.61	90.7	34.3	146.1	274	54.7	220	8	1036	1.01	9720	3.9275	181	263	5.8	0.688213	-0.017795	-2.43343	0.261795
	Zircon-34	0	8.06	0.027	0.78	1.77	0.304	10.94	3.95	44.9	17.7	80.8	162.7	34.6	90	5.5	535	0.81	9490	2.11	61.6	132.9	6.3	0.463506	-0.087863	-2.3029	0.211118
	Zircon-35	0	6.5	0.082	1.53	2.6	1.17	12.9	4.08	46	17.9	86	205	48.9	-60	2.08	585	0.54	9720	3.225	109	197	12	0.553299	-0.017288	-2.57936	0.617379
	Zircon-36	0	7.88	0.031	0.7	1.54	0.425	8.69	3.02	37.7	14.99	72.2	172.4	39.8	70	4.6	482	0.687	9390	2.0625	80.9	184	6.4	0.439674	0.028281	-2.39958	0.355031
	Zircon-37	0	9.21	0.098	2.11	5.36	0.84	31	10.15	116	41.6	175	296	56.7	280	5.5	1211	0.822	9400	2.27	84.8	136	5.9	0.623529	-0.337753	-2.55642	0.199142
	Zircon-38	0	7.46	0.037	1.37	4.37	0.676	27.5	9.42	106.1	39.7	166	286	55.9	60	5.2	1161	0.6	9270	2.2425	78.6	137.7	7.4	0.570806	-0.317432	-2.67821	0.188446
	Zircon-39	4.15	25.7	1.7	8.41	3.03	0.88	8.96	2.73	35.1	15.44	79.6	208	47.9	-140	27.5	515	1.56	9300	0.7075	72.1	123	6.3	0.586179	-0.228158	-2.12494	0.516125
	Zircon-40	0	3.19	0.021	0.6	0.7	0.391	4.84	1.68	20.3	8.46	42.3	115.7	28.9	130	3.5	279	0.418	8370	1.78	42.7	109	5.3	0.391743	-0.025907	-2.44216	0.649161
	Zircon-41	0	8.1	0.055	0.94	2.51	0.58	15.6	5.3	57	21.1	90	172	36.9	350	6.4	620	0.466	11130	7.5	86.1	480	5.7	0.179375	0.445713	-2.56714	0.283254
	Zircon-42	0.01	9.44	0.174	3.29	7.32	0.684	35.3	10.57	116	40.1	165.2	266	50.3	90	16.6	1204	0.9	10330	4.35	165.8	291	7.2	0.569759	0.039011	-2.47064	0.130035
	Zircon-43	7.9	36	1.9	17	10.5	3.36	47.7	15.2	181	66	289	552	111	-390	6.9	1900	1.54	10570	1.2725	176	255	11	0.690196	-0.335399	-2.55442	0.45881
	Zircon-44	0.011	5.73	0.107	1.8	2.74	0.98	10.64	3.31	36.8	15.17	72.6	198	45.9	160	7.4	489	0.406	8560	1.51	68.5	106.6	5.5	0.642589	-0.268908	-2.68814	0.554661
	Zircon-45	0	9.58	0.215	3.2	5.8	1.22	27.1	8.15	93.2	35.7	151.9	290	58.4	180	12.2	1030	0.591	8400	2.78	120.9	189	8.3	0.639683	-0.185936	-2.69081	0.297378
	Zircon-46	0	10.33	0.072	1.23	4.26	0.76	26.5	9.96	122.3	49.7	227	467	97	30	6	1511	0.78	11410	2.4525	91.6	146.4	5.1	0.625683	-0.503776	-2.77722	0.218592
	Zircon-47	0	6.36	0.067	1.24	2.09	0.811	10.42	3.37	36.4	14.32	65.3	152.2	36.3	200	4.3	456	0.445	9100	1.33	47.9	83.9	5.9	0.570918	-0.258653	-2.53405	0.531082
	Zircon-48	3.5	37.3	1.71	10.4	9.79	0.378	54.9	18.2	208	76.4	322	536	102.4	-200	3.2	2170	3.34	6890	1.24	119.8	233	4.7	0.514163	-0.361809	-2.20542	0.049827
	Zircon-49	0	8.53	0.035	0.53	1.59	0.333	10.79	4.03	50.1	18.8	88.3	170.2	34.8	210	7.9	592	0.86	8490	1.4175	56.3	88.4	5.3	0.636878	-0.284507	-2.29646	0.245687
	Zircon-50	0	6.04	0.0125	0.23	1.02	0.141	6.25	2.66	37.9	16.6	85.3	207	45.3	-150	4.6	545	0.769	10980	2.4125	49.8	151.4	4.9	0.32893	-0.135844	-2.43004	0.170658
	Zircon-51	0	12.53	0.111	1.94	4.87	0.9	27.3	9.31	107	39.8	172.3	310	62.1	60	6.9	1192	0.84	8520	2.67	105	177	6.8	0.59322	-0.243388	-2.56708	0.238531
	Zircon-52	0.45	8.2	0.15	1.51	2.5	0.73	13.4	4.14	47.6	19.2	89.8	187	40.1	-80	4	578	0.46	9290	2.975	115	211	9	0.545024	0.052441	-2.60908	0.385432
	Zircon-53	0	5.6	0.046	0.56	1.6	0.474	13.9	4.72	61.2	23.8	115.5	255	55.7	80	5	756	0.397	9790	3.9925	96.4	189.3	6	0.509245	-0.12939	-2.80775	0.307156
	Zircon-54	0.014	8.79	0.201	3.25	5.41	0.81	28.2	8.97	100.9	35.7	152.3	255	48.4	-40	22.5	1082	0.635	8460	2.7025	114.3	148	5.6	0.772297	-0.236278	-2.60377	0.200405
	Zircon-55	0	15.8	0.047	0.67	1.91	0.74	11.1	3.83	50.6	21	105	261	61.3	80	10.7	696	1.93	8920	5.325	190	387	11	0.490956	0.17107	-2.13108	0.491135
	Zircon-56	0	4.18	0.047	0.72	1.16	0.71	6	1.92	23.8	8.8	42.6	103	24.7	440	3	284	0.456	9720	0.865	25.2	53.8	5.3	0.468401	-0.282055	-2.35387	0.822434
	Zircon-57	0.0072	7.12	0.025	0.41	1.05	0.272	5.34	2.01	25.3	11	54.1	132	32.3	30	3.9	353	0.66	10470	3.725	117	253	5.4	0.462451	0.282547	-2.30103	0.351036
	Zircon-58	0	7.47	0.028	0.42	0.85	0.349	6.34	2.58	34	15.6	80.6	221	54.5	50	5.2	502	1.35	9490	3.3875	95.7	251	8	0.381275	0.055281	-2.21406	0.459429
	Zircon-59	0	6.81	0.03	0.34	1.47	0.42	8.1	2.97	37.1	15.3	78.4	204	48.9	90	3.4	510	0.516	11530	5.175	101.2	325	3.5	0.311385	0.202253	-2.59698	0.371959
	Zircon-60	0.025	14.08	0.05	0.78	2.14	0.593	14.9	5.37	65.9	26.6	120.1	237	48.1	-40	13	783	2.17	8610	0.3225	37.8	64	4.9	0.590625	-0.568568	-2.03829	0.320924
	Zircon-61	0	1.68	0	0.079	0.29	0.095	1.32	0.683	9.8	4.24	22.8	67.7	17.6	90	1.6	143.3	0.291	11090	2.165	33.8	138	5.6	0.244928	0.30929	-2.3667	0.469229
	Zircon-62	0	5.36	0.153	3.35	6.23	0.509	36.1	11.92	139	50.5	210	353	68.6	-100	2.5	1411	1.27	8990	4.65	120.2	263	6.6	0.457034	-0.127819	-2.44397	0.103721
	Zircon-63	0.085	30.8	0.378	6.63	11.3	4.65	49	15.9	178	63	276	489	98.1	-290	17	1790	1	7980	0.6775	166	133.5	15	1.24345	-0.563828	-2.68931	0.603897
	Zircon-64	0	2.37	0.026	0.75	1.26	0.492	5.76	1.61	14.11	4.03	14	23.1	4.66	-140	6.8	129.9	0.245	8170	0.61	16.3	40.8	7.3	0.39951	0.247048	-1.97445	0.558105
	Zircon-65	0.152	6.52	0.13	1.5	2.07	0.73	8.83	3.12	36.4	14.83	72	168	38.7	-320	4.2	477	0.7	5360	1.855	60	121	7	0.495868	-0.142524	-2.38021	0.521801
	Zircon-66	36.2	76.6	11.89	55	14	4.17	17	3.53	27.5	8.4	34	74	15.4	-3530	266	253	1.29	8420	3.45	130.5	144	4.9	0.90625	0.289131	-1.75864	0.826028
	Zircon-67	0.279	40.2	0.132	0.87	1.67	0.53	10.49	3.35	43.3	18.64	87.7	213	47.9	180	4.2	573	1.96	9370	7.55	481	661	4.3	0.727685	0.491822	-2.03612	0.38697
	Zircon-68	0.215	9.2	0.082	1.12	1.36	0.53	8.7	3.55	47.9	19.2	95	215	48	-20	15	609	1.24	10470	3.875	66.3	233	9.6	0.284549	0.034917	-2.23902	0.470863
	Zircon-69	0	13.24	0.02	0.65	2.31	0.33	20.4	7.72	93.2	35.8	162.5	309	60.9	-620	5.9	1094	0.89	11860	3.0475	131.4	190.3	4.7	0.690489	-0.21052	-2.54057	0.146906
	Zircon-70	0	14.49	0.026	0.47	1.25	0.174	10.91	4.55	57.1	23.1	108.8	225	47.3	160	5.4	708	1.42	12800	4.725	136.4	302	5.6	0.451656	0.127824	-2.19989	0.143989
	Zircon-71	0.43	4.48	0.118	1.18	2.34	0.206	17.1	6.41	81.6	32.5	146.7	312	65.2	110	1.99	1004	2.2	10370	10.65	112.9	671	7	0.168256	0.332568	-2.15173	0.09952
	Zircon-72	0	6.69	0.067	1.18	1.68	0.84	9	2.99	35.9	14.65	72	180	43.4	610	6.2	462	0.75	8830	1.955	29.2	66.7	6.8	0.437781	-0.431147	-2.38021	0.660162
	Zircon-73	0.103	11.95	0.139	1.56	2.65	1	14	4.66	55.6	22.1	108.2	267	63.6	410	2.9	719	0.9	11010	4.175	176	307	7	0.57329	0.060627	-2.47227	0.501719
	Zircon-74	22.3	58	6.4	30	8.6	1.3	21.1	5.78	63.9	23.9	105.6	229	50.4	-9600	3.7	718	0.59	10820	5.475	153	366	5.8	0.418033	0.203646	-2.58898	0.294917
	Zircon-75	0	9.05	0.0114	0.32	1.31	0.282	8.48	2.62	35	13.47	62.9	125.4	26.7	640	12.3	411	0.784	9630	1.3625	46.2	84.3	5.4	0.548043	-0.17247	-2.20398	0.258561
	Zircon-76	11.1	32	4.2	18	4.4	0.61	8.2	2.31	27.1	10.3	50	111	24.6	-11900	3.3	327	0.399	10650	2.0975	49.9	128	4	0.389844	0.061887	-2.44435	0.310344
	Zircon-77	0.029	5.61	0.24	4.08	7.87	0.627	50.8	16.83	208	79.5	342	563	109.7	-400	10.6	2260	1.03	8820	6.2	180	262	6.2	0.687023	-0.332207	-2.73767	0.095829
	Zircon-78	0	7.61	0.129	2.86	5.17	0.93	27.4	8.65	103.8	38.8	164	292	60	-1800	13.9	1110	0.477	9490	1.715	68.5	93.3	7.6	0.734191	-0.495501	-2.78686	0.238787
	Zircon-79	31	85	7.5	35	11.2	1.32	32	10	119	42.7	183	343	68.1	-25800	12.4	1210	2.11	9130	0.66	99	115	5.8	0.86087	-0.474596	-2.21101	0.213077
	Zircon-80	0.02	6.03	0.152	2.7	3.95	0.307	9.64	1.66	12.26	2.88	9.55	12.17	2.08	-3100	16.2	85.5	0.533	10030	10.45	183.9	108.5	3.6	1.69493	0.950139	-1.35856	0.152037
	Zircon-81	0.095	9.55	0.071	0.98	1.74	1.05	9.5	2.78	30.6	10.27	46.1	96.7	24.4	300	1.67	354	0.63	8540	2.415	56.9	175.9	7.2	0.323479	0.259839	-2.18609	0.789224
	Zircon-82	0.0027	10.15	0.23	3.6	5.17	1.92	26.1	8.31	92.8	35	155.6	306	64.5	-700	3.5	1040	0.82	7010	3.235	144.9	262	5.5	0.553053	-0.06742	-2.57191	0.505107
	Zircon-83	0	4.81	0.016	0.56	1.36	0.298	8	3.05	36.9	15.5	70.8	156	32.6	300000	3.5	457	0.647	9190	1.6125	31.8	86	5.4	0.369767	-0.258626	-2.38222	0.276089
	Zircon-84	0	3.5	0.018	0.45	0.8	0.367	5.63	1.87	22.6	8.31	40.5	103.3	25.5	9900	2.4	277	0.478	8550	1.595	30	92	5.1	0.326087	-0.050312	-2.33467	0.528463
	Zircon-85	0.026	6.21	0.051	1.16	3.15	0.64	21.5	7.5	93	36.5	169	330	68.8	5200	7.7	1100	0.64	9500	1.57	51	86.2	7.1	0.591647	-0.583007	-2.71233	0.237658
	Zircon-86	0.312	8.75	0.24	2.73	4.81	0.56	31.1	11.02	134.4	50.5	221	383	74.9	2860	7.9	1487	0.685	11040	7.25	237	387	4.9	0.612403	0.004512	-2.74751	0.139921
	Zircon-87	48	121	10.4	44	11.8	1.89	32.3	9.35	101.5	37.4	168	339	69.1	14800	8.3	1145	1.54	11020	3.525	308	298	6.1	1.03356	-0.055983	-2.34268	0.295847
	Zircon-88	0	11.32	0.029	1	2.52	0.67	16.9	6.26	72.3	27.5	119.8	221	44.5	600	8.7	805	0.7	9710	1.465	84.1	125.7	5.6	0.669053	-0.245057	-2.49929	0.313746
	Zircon-89	0.0054	9.77	0.125	2.68	6.18	1.14	28.6	9.06	98.1	34.3	149.5	257	50.3	1350	8.3	1013	0.537	9270	2.7075	126.5	171.7	6.5	0.73675	-0.175163	-2.67996	0.262044
	Zircon-90	0	3.73	0.0083	0.34	0.79	0.458	5.1	1.62	21.5	8.7	43.1	111.1	27.4	360	3.8	275	0.304	9740	1.0225	25.7	58.4	5.8	0.440068	-0.279301	-2.56284	0.697291
	Zircon-91	0	9.81	0.25	3.05	6.91	1.2	25.9	8.04	90.9	31.7	135.4	227	44.7	1590	13.3	957	0.82	7790	1.765	94	111	7.1	0.846847	-0.310703	-2.44221	0.274119
	Zircon-92	0.011	2.9	0.048	0.94	1.82	0.288	11.5	4.22	48.1	17.6	79.5	145.4	31	750	13.8	526	0.571	8190	1.4975	25.8	89	6.9	0.289888	-0.213174	-2.40593	0.192378
	Zircon-93	0.27	8.7	0.219	2.71	4.6	0.67	26.4	9	107	40.4	176	307	62.1	1280	6.5	1170	0.74	8880	3.75	93	169	6.5	0.550296	-0.259252	-2.61791	0.185798
	Zircon-94	0	10.63	0.031	0.53	1.99	0.59	10.6	3.94	51.5	22.4	114	269	62.8	540	3.4	706	1.59	8710	5.85	171	367	10	0.46594	0.134914	-2.22836	0.392573
	Zircon-95	0	6.39	0.024	0.37	1.13	0.272	5.53	2.2	29.3	12.6	62.8	160	38.9	590	3.8	405	0.644	9050	2.7725	65.6	179	6.6	0.36648	0.048733	-2.39523	0.332518
	Zircon-96	0	8.1	0.017	0.68	2.54	0.418	15.3	5.47	64.4	24.3	111.9	227	49	820	5.6	747	0.453	11770	1.325	49.7	77.2	5.2	0.643782	-0.468409	-2.69993	0.204909
	Zircon-97	0.018	11.04	0.035	0.67	1.32	0.507	10.35	3.08	42.7	18.5	93.1	236	55.2	780	5.7	595	1.19	9760	5.95	154.6	388	6.8	0.398454	0.21592	-2.29737	0.419178
	Zircon-98	0.25	6.78	0.066	0.88	0.92	0.437	6.19	2.2	30.7	12.59	66.2	174.4	43.1	550	4	409	0.64	9000	2.6425	70.1	174.4	6.9	0.40195	0	-2.43537	0.559615
	Zircon-99	0.012	7.69	0.024	0.172	0.68	0.311	4.72	1.76	21.5	9.36	46.5	117.7	27	490	4.1	295	0.799	12300	4.1	75.6	251	4.2	0.301195	0.328897	-2.16823	0.530496
	Zircon-100	0	3.93	0.0142	0.24	0.35	0.246	2.99	1.07	14	5.93	30.3	82.8	19.9	520	3.2	192	0.435	10820	1.79	27.7	111.2	4.8	0.249101	0.128074	-2.27954	0.734874
	Zircon-101	0.64	11.1	0.27	1.84	2.95	0.661	11.89	4.09	48.6	19	91.1	203.6	45.2	720	4.9	603	0.619	8810	2.675	128.9	206.3	4.9	0.624818	0.005721	-2.51709	0.341073
	Zircon-102	0.41	9.57	0.152	0.81	0.92	0.367	5.97	2.22	27.9	12.42	64.9	160.2	39.4	1080	4.8	410	0.93	8630	2.4375	83.7	189	5.3	0.442857	0.071799	-2.23618	0.478556
	Zircon-103	0	3.26	0.024	0.3	0.89	0.345	9.13	2.97	42.3	15.73	69.2	129.9	26.4	440	8.4	448	0.458	8350	0.91	26.7	59.8	6	0.446488	-0.336908	-2.45274	0.369859
	Zircon-104	4.6	20.9	1.42	6.2	2.05	0.77	7.77	2.31	27.8	11.5	57	141	33.7	1820	2.6	367	0.461	9540	1.76	44.4	105	9.2	0.422857	-0.12803	-2.48552	0.589591
	Zircon-105	0	7.84	0.056	1.15	1.51	0.6	9.27	3.22	37.5	15.37	75.2	175.9	41.8	300	3.2	489	0.8	10130	4.225	120.8	286	4.7	0.422378	0.2111	-2.34218	0.490084
	Zircon-106	0.79	13.2	0.159	0.97	1.23	0.49	8.1	3.02	39.5	17.1	83	220	54.5	980	2.05	540	1.25	10250	6.175	139	411	8.5	0.3382	0.271419	-2.24551	0.474404
	Zircon-107	0.0076	9.39	0.068	1.73	3.53	0.67	17.5	5.91	66.4	24.8	112.9	235	48.9	390	4.5	760	0.465	9240	3.75	142	236	4.4	0.601695	0.001844	-2.70362	0.260505
	Zircon-108	0	9.39	0.055	1.24	4.13	0.572	28.1	9.29	115.3	43.7	193	349	69.9	410	7.6	1306	0.649	9560	2.7225	116.6	164.5	6	0.708815	-0.32666	-2.73058	0.162261
	Zircon-109	0.81	4.29	0.095	0.58	0.3	0.118	0.94	0.51	7.6	3.46	21.2	73	22.7	-140	107	131	0.67	9700	27	19.7	754	5.8	0.026127	1.01405	-2.03725	0.679055
	Zircon-110	0	4.37	0.047	0.65	2.19	0.347	14.8	5.45	64.7	25.3	112.8	205	41.1	750	13.2	767	0.677	8320	1.015	31.5	62.1	4.5	0.507246	-0.518662	-2.48116	0.186262
	Zircon-111	0	4.83	0.021	0.36	0.9	0.312	5.96	1.98	29	11.53	60	165.3	40.5	540	3	387	0.46	8630	1.895	42.2	121.4	6	0.347611	-0.134054	-2.55552	0.411678
	Zircon-112	8.7	39	6.6	33	10.7	1.71	21.8	5.82	59.2	20.7	95.4	196	43	8800	3.3	647	0.388	8450	2.1975	67.4	139.3	6.6	0.483848	-0.148305	-2.70342	0.342155
	Zircon-113	9.33	0.266	2.52	3.15	0.89	13.7	4.35	50.1	19.2	89	203	46.6	9580	760	593	0.425	0.62	3.085	109	200	200	5.2	1	0.632644	-1.87599	21.2779
	Zircon-114	6.44	0.026	0.38	0.8	0.303	5.77	2.22	28.6	12.27	62.8	163	39.5	9240	290	402	0.98	0	3.15	79.1	202	202	5.8	1	0.708754		21.4994
	Zircon-115	8.1	0.14	2.84	5.6	1.41	35.1	11.8	139	52	230	416	84	8650	550	1530	0.99	0.0059	2.475	104	143	143	10	1	0.231057	-4.15343	26.2969
	Sample: Yaq-62 (EL Salto Formation sandstone)
	Zircon-01	0.017	18.25	0.039	0.84	2.44	0.388	15.01	5.42	69.8	28.5	137.6	302	63	1000	2.2	904	3.87	8020	8.575	329	821	­	0.400731	0.434336	-1.8923	0.195927
	Zircon-02	98	224	25.1	101.2	16.4	2.08	23.2	5.12	52.1	19.6	92.3	204	42.9	-18500	4130	637	2.65	7110	2.6425	116	190	­	0.610526	-0.030877	-1.88638	0.32587
	Zircon-03	1.15	14.7	0.33	2.15	2.24	0.68	10.3	3.7	47.7	18.9	94.6	238	57.6	-200	14.3	624	1.26	7710	2.495	85	183	­	0.464481	-0.114126	-2.27621	0.432627
	Zircon-05	0.019	10.64	0.045	0.76	1.45	0.499	10.02	3.49	43.6	16.46	78.4	171.8	37.1	-800	0.8	540	1.24	7180	3.4875	98	249	­	0.393574	0.161176	-2.1416	0.400065
	Zircon-06	0.61	16.2	0.318	2.14	2.37	0.56	13.8	5.47	69.6	29.3	144.5	343	74.3	-1100	439	966	2.03	7810	4.475	131	311	­	0.421222	-0.042534	-2.2278	0.299241
	Zircon-07	400	1042	136	654	138.9	4.25	170	30.5	271	86.9	349	596	114.5	-23800	0	2620	9.05	6240	1.68	383	579	­	0.661485	-0.012568	-1.8186	0.08452
	Zircon-08	0.55	23.8	0.315	4.37	6.89	1.96	36.1	12.02	149.1	58.7	279	623	141.8	-1300	20	1890	1.93	6860	2.665	581	689	­	0.843251	0.043731	-2.50893	0.379787
	Zircon-09	0.41	16.69	0.12	0.88	1.08	0.47	7.82	3.01	43.1	19.5	105.4	293	69.1	-700	17.9	646	1.79	7790	1.1975	163	302	­	0.539735	0.013139	-2.21401	0.494231
	Zircon-11	0.17	24.5	0.052	0.81	1.62	0.422	11.82	4.06	51.9	21.48	106.4	242	51.7	500	4.9	704	2.08	8560	2.3875	258	446	­	0.578475	0.265519	-2.06575	0.294709
	Zircon-12	0	22.2	0.046	0.7	1.79	0.743	11.73	3.9	48.8	19.55	94.7	232	52.1	-900	1	653	3.42	7650	6	229	492	­	0.465447	0.326477	-1.83146	0.495519
	Zircon-13	0	4.79	0.0031	0.16	0.58	0.29	3.65	1.49	20.1	9.37	51.3	161	39	400	0	323	1.4	9380	71.5	34	281	­	0.120996	0.24188	-2.0607	0.609095
	Zircon-14	0.338	33	0.15	1.37	2.24	0.686	13.6	4.79	61.2	24.2	111.6	244	50.8	-2100	60	720	4.15	6760	20.95	60	68	­	0.882353	-0.554881	-1.76934	0.37982
	Zircon-15	2.96	18.8	1.27	6.6	5.38	0.406	23.3	7.39	84.7	31.2	132.2	233	45.2	-3600	18	922	1.8	7730	7.25	192	476	­	0.403361	0.310251	-2.11208	0.110816
	Zircon-16	7.7	49.7	3.1	21	16.8	4.58	73.5	22.9	248	90.9	388	711	139	-2800	9.4	3580	2.05	7280	0.9425	278	257	­	1.08171	-0.441936	-2.54012	0.398304
	Zircon-18	0.119	14.8	0.198	2.32	3.54	1.29	18.5	6.22	76.2	31.8	156.8	403	88.2	-1800	0	1038	1.15	7770	1.15	290	379	­	0.765172	-0.026666	-2.54461	0.487135
	Zircon-19	0.017	23.15	0.068	1.54	3.07	0.433	16.7	5.77	68.1	27	124	256	51	-1800	5.3	790	4.37	9400	55.5	122	206	­	0.592233	-0.094373	-1.76776	0.184803
	Zircon-21	0.015	12	0.031	0.7	1.32	0.439	8.32	3.29	40.3	16.98	83.7	205.9	46.6	100	5.8	543	1.69	8170	2.49	85	180	­	0.472222	-0.058384	-2.08577	0.404821
	Zircon-22	6.9	27.2	1.39	6.6	3.26	0.92	15.3	5.5	69.9	29.9	155.6	404	93.2	-6700	3.5	1001	1.92	7800	1.4225	219	343	­	0.638484	-0.071087	-2.32308	0.39809
	Zircon-23	1.41	60.2	0.29	2.22	4.06	1.35	22.4	8.76	111	45.1	220.5	516	106.8	-5700	5.8	1463	7.42	8180	2.2575	452	636	­	0.710692	0.090807	-1.84225	0.432608
	Zircon-24	0.26	12.65	0.294	4.63	11	2.16	64	20.8	247	87.6	374	619	118.5	-800	10.8	2520	3.11	7950	2.145	279	428	­	0.651869	-0.160247	-2.29893	0.24878
	Zircon-25	0.76	18.9	0.99	8.5	11	0.79	56.7	23.5	331	133	654	1550	310	-7400	1.1	5440	9.05	7890	2.0675	378	506	­	0.747036	-0.486181	-2.23368	0.096669
	Zircon-26	3.89	46.6	1.08	4.85	3.71	1.32	19.8	7.2	93	37.3	180	419	93	-3700	6.3	1200	4.44	8700	8.25	575	907	­	0.633958	0.335393	-1.97483	0.470654
	Zircon-27	0.008	41.8	0.206	2.68	5.01	1.91	27.5	8.6	95.6	34.2	141	238	43.7	-1600	10.9	1054	4.19	9310	112.75	1035	645	­	1.60465	0.432983	-1.75436	0.497274
	Zircon-28	1.14	10.3	0.27	1.41	1.38	0.474	7.43	2.62	35.1	14.9	77.9	204.4	49.1	-3500	0	500	1.24	8370	3.2425	85	230	­	0.369565	0.051247	-2.21706	0.452368
	Zircon-29	0	33	0.036	1.18	2.69	1.13	16.8	5.99	70.5	27.4	128.6	305	70	-900	1.2	934	2.59	8860	5.425	349	572	­	0.61014	0.273096	-2.071	0.513683
	Zircon-30	0	7.96	0.0154	0.39	0.8	0.282	5.01	2.18	28.8	12.8	67.2	181.8	43.9	1200	6.2	424	1.12	7840	0.795	95	215	­	0.44186	0.072845	-2.21038	0.43046
	Zircon-31	15.7	111	5.5	34.8	32.7	3.23	149.7	45.3	494	164.7	673	1080	196.3	-10400	6.1	6250	14.73	7050	2.7775	831	823	­	1.00972	-0.118024	-1.86522	0.14108
	Zircon-32	0	8.23	0.119	1.84	4.27	0.9	23.5	7.3	81.6	29.3	125.2	228	45.2	-1700	5.5	868	1.17	11540	6.825	62	430	­	0.144186	0.275534	-2.28975	0.274563
	Zircon-34	0.437	23.7	0.151	1.34	2.36	0.319	13.72	5.13	67	26.8	132.8	285	59.9	-400	4.8	875	3.49	11080	10.65	453	919	­	0.492927	0.508471	-1.91202	0.171319
	Zircon-35	0.017	17.67	0.063	1.29	3.02	0.318	20.5	7.12	98	39.2	187.5	390	78.5	1000	7.9	1199	1.29	9370	8.525	233	344	­	0.677326	-0.054506	-2.48048	0.123508
	Zircon-36	0.54	8.14	0.443	7.21	11.2	1.32	51.4	17.1	196	72.5	335	620	125.3	2300	350	2280	6.5	7510	7.975	357	544	­	0.65625	-0.056793	-1.97948	0.168124
	Zircon-37	1.06	17.3	0.25	2.56	2.98	1.14	13.09	4.37	52.5	19	85.2	187.8	41.6	-6700	10	623	1.47	9530	1.4325	75	123	­	0.609756	-0.18379	-2.10638	0.557795
	Zircon-38	0.063	10.71	0.065	0.88	1.31	0.563	10.77	4.14	51.8	22.6	115.7	285	68.3	-5500	0	745	1.26	10100	1.3	233	359	­	0.649025	0.10025	-2.35447	0.458049
	Zircon-39	0.63	12.1	0.269	2.41	3.72	1.3	21.3	7	85	33.7	159	353	78	-2900	10.1	1030	0.93	9790	0.79	168	222	­	0.756757	-0.201422	-2.57929	0.446303
	Zircon-40	0	44	0.079	1.38	3.72	1.44	23	8.95	114.6	46.8	220	515	109.9	-4000	7.4	1459	4.24	10030	1.5975	313	435	­	0.71954	-0.073318	-2.08444	0.475745
	Zircon-41	1.42	13.6	0.247	1.43	1.61	0.459	9.39	3.04	42.4	18.22	91.6	232.4	54.6	-11400	33.9	595	1.82	9250	1.5225	234	349	­	0.670487	0.176589	-2.10616	0.360757
	Zircon-42	1.28	15.3	0.31	2.63	3.58	1.02	17.8	6.28	80.4	32.9	163.5	400	92.4	-4100	4.9	1048	1.32	9090	1.31	217	327	­	0.663609	-0.087512	-2.48149	0.390478
	Zircon-43	0.0019	13.93	0.03	0.67	2.25	0.239	15.02	5.64	69.7	28.3	127.8	254	49.9	1900	11.7	872	1.54	11050	6.25	151	262	­	0.576336	0.013468	-2.21731	0.125637
	Zircon-44	0.4	12.9	0.245	2.62	2.97	1.35	17	6.1	71.9	30.1	149	357	81.8	-12000	3.8	960	0.91	10070	1.24	244	329	­	0.741641	-0.035472	-2.59363	0.580602
	Zircon-45	18.2	43	3.8	14.3	3.18	0.59	7.5	2.56	32.8	14.32	73.5	203	47.7	-40000	6.1	471	1.14	10190	0.9825	106	217	­	0.488479	0.028964	-2.25059	0.369195
	Zircon-46	21.9	61	5.3	25.3	7.2	1.97	22.7	6.33	69.7	25	113.4	248	53.1	-80000	4	789	1.43	10020	5.2	210	428	­	0.490654	0.236992	-2.23912	0.470906
	Zircon-47	0.206	51.3	0.124	1.69	3.81	1.17	21.6	6.9	84.1	32.8	157.6	373	81.1	-100000	1.6	1079	5.01	9410	11.85	1078	946	­	1.13953	0.404182	-1.87187	0.394134
	Zircon-48	0.46	17.3	0.64	10	19.4	3.26	98	31	354	125.2	516	846	156.3	-12000	26	4630	3.4	8820	2.13	429	655	­	0.654962	-0.111129	-2.39589	0.228482
	Zircon-49	9	33	3.2	21.8	8.3	0.67	32.8	11.41	145.3	58.8	271	537	109.2	-58000	0	1713	2.38	9970	7.175	176	425	­	0.414118	-0.101585	-2.3534	0.124093
	Zircon-50	42	103	9.1	38	7.6	1.51	20.6	5.56	69.1	27.1	134.2	331	77.9	-250000	10.5	888	2.31	8720	10.975	628	750	­	0.837333	0.355233	-2.15622	0.368794
	Zircon-51	0.053	22.5	0.229	3.19	5.09	1.85	26.9	9.24	112.3	45.7	232	568	129.7	300000	5.2	1540	1.84	9630	1.72	364	460	­	0.791304	-0.091591	-2.48953	0.483152
	Zircon-52	0.0019	23.9	0.076	1.71	4.1	2.1	25.4	8.1	91	31.7	137	261	54.5	37000	3	990	3.38	11540	3.925	163	310	­	0.525806	0.074721	-1.88772	0.628866
	Zircon-53	0.041	4.61	0.085	2.13	6.57	0.83	46.4	17.19	218	85.3	379	659	128.7	15000	11.5	2720	0.9	8740	2.61	96	148	­	0.648649	-0.648624	-2.86464	0.145273
	Zircon-54	33	84	7.1	27.5	6.5	1.07	13.6	4.54	54.2	21.23	102.9	240	51.2	94000	1.1	678	2.65	9890	4.1375	260	386	­	0.673575	0.206376	-1.95697	0.34778
	Zircon-55	8.9	28.9	2.1	9.2	2.97	0.8	10.9	3.8	48.9	20.3	107.5	280	64.7	26000	6.5	676	1.03	10400	0.83	120	228	­	0.526316	-0.089223	-2.43432	0.429681
	Zircon-56	0.151	30.2	0.161	2.25	4.2	1.142	25.7	8.96	103.5	39	175.7	359	75.7	70000	6.8	1258	2.81	10480	23.425	878	2595	­	0.338343	0.859043	-2.10639	0.33591
	Zircon-57	2.47	12.7	0.71	4.43	3.29	0.818	14.85	4.77	55.9	21.9	101.2	232.5	51.9	25000	3.6	702	1.03	9980	3.43	82	204	­	0.401961	-0.056793	-2.35359	0.357635
	Zircon-58	0.114	10.65	0.057	0.72	1.83	0.306	11.22	3.95	45.9	17.79	79.3	152.3	29.7	1800	8.1	543	0.675	11240	2.95	97	195	­	0.497436	0.107335	-2.3534	0.20637
	Zircon-59	0	11.23	0.053	1.11	1.77	0.711	13.62	4.91	67.6	28.1	145.1	366	84.8	1500	0.8	933	1.51	10470	1.62	233	426	­	0.546948	0.065929	-2.3845	0.442529
	Zircon-60	0.76	16.3	0.304	2.61	4.33	2.98	27.7	8.34	78.7	23.24	87.4	153.2	29.64	25100	4.8	727	4.19	10870	5.365	64	343	­	0.186589	0.350035	-1.56305	0.831534
	Zircon-61	0.9	12.93	0.266	2.3	2.69	0.98	14.2	4.67	61.2	24.6	122.1	302	69.1	300	7.5	786	1.16	9120	1.0075	164	242	­	0.677686	-0.096192	-2.41555	0.484566
	Zircon-62	81.6	195	20.6	82.1	15.1	2.56	24.3	5.93	63.2	22.7	104.8	237	52.1	85000	5.3	742	1.84	11270	6.775	233	404	­	0.576733	0.231633	-2.10993	0.408409
	Zircon-63	0	11.62	0.042	0.66	2.03	0.847	12.18	4.29	53	21.2	104.9	261.6	61.5	-3000	2.2	692	1.05	10130	4.2125	145	274	­	0.529197	0.020113	-2.39645	0.520546
	Zircon-64	0	9.56	0.058	1.1	2.82	0.95	15.7	6.22	82.2	36.9	195	475	110.6	9900	6.5	1194	1.45	8280	1.0575	138	288	­	0.479167	-0.217301	-2.51533	0.436312
	Zircon-65	0.0065	1.38	0.1	2.54	3.82	0.659	23.1	7.08	80.2	28.9	123.5	223	44.7	6900	8.5	819	0.85	8290	1.8725	46	139	­	0.330935	-0.20529	-2.41889	0.214385
	Zircon-66	0.236	13.21	0.36	5.26	8.61	2.69	45	13.58	147.9	53.5	227.3	434	87.1	4600	8.2	1600	1.08	8770	6.175	344	437	­	0.787185	0.002992	-2.60407	0.41763
	Zircon-67	1.7	29.1	0.4	2.25	1.82	0.693	11.94	4.13	52.8	21.5	105.6	260	59.4	2000	2.1	719	3.46	10860	6.67	241	502	­	0.48008	0.28573	-1.8759	0.4543
	Zircon-68	0.014	12.04	0.046	0.64	1.01	0.502	6.49	2.38	29.3	11.89	56.9	142.7	33	-700	1.8	387	1.56	10110	4.1425	129	289	­	0.446367	0.306474	-1.9613	0.599195
	Zircon-69	52	126	10.7	44	8.5	1.55	17.2	4.67	51.2	19.6	92.6	218.8	48.2	24700	7.7	642	1.79	9640	3.065	206	247	­	0.834008	0.05265	-2.08719	0.391747
	Zircon-70	12.6	49.6	3.36	18.4	9.68	2.22	41.9	14.11	164.4	64.3	292	587	121.8	15200	5.3	1950	3.73	9270	9.65	563	830	­	0.678313	0.15044	-2.19693	0.336865
	Sample: Yaq-49 (EL Salto Formation sandstone)
	Zircon-01	0.01	22.9	0.178	3.22	6.71	0.367	38.3	13.33	157	58.4	259	461	90.8	-3300	2.2	1680	3.45	9390	103.75	167	368	­	0.453804	-0.097853	-2.12588	0.06996
	Zircon-02	0.0084	25.8	0.139	2.34	6.05	1.91	30	10.64	125.7	47.2	212.2	399	79.9	900	7	1398	2.7	9410	0.85	107	161	­	0.664596	-0.394147	-2.16961	0.433254
	Zircon-03	9.4	56.7	2.7	14.4	6.5	1.5	24.5	7.1	79.9	28.2	125.9	248	51.2	2300	10.2	893	2.98	10850	3.735	259	349	­	0.74212	0.148374	-1.92023	0.363244
	Zircon-04	32.4	90	9.8	51.2	13.6	1.48	32.6	8.49	85	28.7	119.9	210.8	40.5	17200	14.9	870	0.78	9940	3.45	153	248	­	0.616935	0.070581	-2.43178	0.214798
	Zircon-05	0.47	28.5	0.69	10.6	20	2.68	130.6	44.4	535	197.4	817	1263	231	1500	0	7000	15.6	9670	11.95	325	593	­	0.548061	-0.328349	-1.90828	0.160249
	Zircon-06	0.22	12.93	0.068	1.39	1.95	0.681	10.74	3.74	48.5	20.6	104.8	255	59.7	2000	4.7	675	1.26	9930	3.0625	122	229	­	0.532751	-0.046705	-2.30617	0.454753
	Zircon-07	0.367	27.9	0.478	5.91	8.8	3	30.5	8.6	81	28.3	126	280	64.7	1400	3.7	920	1.97	8440	114.5	336	372	­	0.903226	0.123385	-2.15269	0.5596
	Zircon-08	0.85	345	1.04	15.8	29.4	8.44	144.6	48.9	582	217	973	1817	354	3300	11.3	8640	25.7	8840	8.925	7723	2913	­	2.65122	0.204986	-1.84942	0.395578
	Zircon-09	0.0017	73.3	0.094	1.69	4.24	1.57	30.9	11.95	156.5	67.6	340	826	182.2	1100	2	2210	7.25	10320	4.245	1056	823	­	1.28311	-0.00158	-2.05664	0.419165
	Zircon-10	0.13	22.67	1.74	26.9	32.7	11.73	107.9	27	235	64.7	222	304	54.6	2400	4.2	1908	2.58	8720	5.3275	257	357	­	0.719888	0.069795	-2.07125	0.603477
	Zircon-11	0.254	43.4	0.419	5.95	10.5	3.96	54.4	18.8	232	91	419	865	179.8	3000	14.6	3360	2.79	9090	2.165	419	462	­	0.906926	-0.272374	-2.49141	0.506347
	Zircon-12	0	111.5	0.082	1.59	4.92	0.454	38.2	15.73	212.6	87.6	407	768	146.7	3600	2.8	3020	18.95	11420	3.5125	696	635	­	1.09606	-0.082587	-1.60775	0.101202
	Zircon-13	2.9	19.8	0.43	2.82	3.83	0.098	23.3	8.17	97.8	36.5	157	278	52.4	1400	7	1036	5.93	10260	1.8275	135	355	­	0.380282	0.106184	-1.67099	0.031703
	Zircon-14	0.39	32.7	0.154	1.4	2.45	0.516	16.75	6.43	86	35.4	176.5	405	86.6	2200	4.4	1136	4.15	10530	2.5325	365	512	­	0.712891	0.101815	-1.98941	0.246154
	Zircon-15	3.9	30.7	1.07	9.4	9.3	1.4	49.7	18.2	226	93.8	452	951	202	5200	0	3560	3.78	9320	20.3	603	911	­	0.66191	-0.018662	-2.40069	0.199001
	Zircon-16	0.019	13.41	0.105	2	4.88	1.18	25.4	9.63	118.6	45.3	211	424	85.2	1400	0	1367	2.33	11120	287	309	966	­	0.319876	0.357611	-2.26001	0.323894
	Zircon-18	0.071	11.51	0.088	1.82	3.42	0.92	16.8	5.54	66.7	26.4	125	292	66.7	400	4.2	827	1.06	10500	5.0075	162	322	­	0.503106	0.042473	-2.44008	0.370909
	Zircon-19	0.79	14.96	0.169	2.5	4.53	1.28	25	8.15	98.7	39	178	355	75.9	1200	3.5	1168	1.45	9480	5.075	207	411	­	0.50365	0.063613	-2.38886	0.367569
	Zircon-20	0.031	12.12	0.185	2.84	4.67	1.68	19.7	6.04	69.5	25.5	122.1	286	62.2	1300	6.6	844	0.831	10020	3.84	196	252	­	0.777778	-0.054965	-2.53676	0.53526
	Zircon-21	0.0025	1.61	0.038	0.87	2.93	0.245	20.5	7.31	89.8	34.7	157.9	306	64.7	1700	0	1050	1.21	9920	4.0125	67	230	­	0.291304	-0.123994	-2.40294	0.096606
	Zircon-22	0.035	15.9	0.057	0.95	2.36	0.97	13	4.94	65.7	27.9	149	444	109.7	900	2.2	934	1.17	15640	38.5	555	4763	­	0.116523	1.0305	-2.5792	0.53517
	Zircon-23	6.6	78.6	2.22	14	16.4	2.44	73.5	26	310	118.4	537	1100	219	3400	1.3	4720	10	10210	27.925	2661	4225	­	0.629822	0.584434	-2.04139	0.214769
	Zircon-24	0.44	10.74	0.215	2.24	2.49	0.469	12.09	3.82	45.5	16.99	77.4	164.8	34	800	7520	525	10.6	9200	3.21	94	189	­	0.497354	0.059505	-1.19165	0.261221
	Zircon-25	0.025	21.89	0.093	1.45	2.69	0.941	13.46	4.2	45.5	16.67	74.2	165.6	36.5	1020	2.8	546	1.9	10420	2.8025	279	295	­	0.945763	0.250762	-1.94031	0.477902
	Zircon-26	0.0108	11.21	0.071	1.17	3.12	0.627	20.1	6.95	83.2	31.9	152.5	340	75.6	1100	0.39	1035	1.12	11840	7.625	222	517	­	0.4294	0.182012	-2.48226	0.241958
	Zircon-27	14.2	50.4	5.5	31.5	22.9	1.54	84.9	24.09	254	85.4	330.1	507	90.1	2000	6.8	2428	8.5	8380	1.935	357	436	­	0.818807	-0.065521	-1.77559	0.106732
	Zircon-28	4.7	25	0.95	4.2	3.02	0.88	12.95	4.45	53.6	22.2	109.6	270.9	61.7	1000	44	720	1.6	9960	7.225	348	514	­	0.677043	0.278154	-2.22869	0.430023
	Zircon-29	0.0134	5.77	0.0118	0.5	1.36	0.268	6.92	2.57	32.9	13.89	68.5	175.4	39.1	200	520	459	1.49	11870	6.675	149	407	­	0.366093	0.365565	-2.07084	0.266968
	Zircon-30	0.03	3.71	0.081	1.45	4.49	0.129	31.3	12.98	160.7	62.4	275	503	94	2100	0	1884	1.18	10370	181.25	98	612	­	0.160131	0.085183	-2.62969	0.033254
	Zircon-31	0.026	59.4	0.337	5.7	10.6	4.18	51.2	16.7	199	79.5	358	800	172	2000	7.1	3010	2.69	8700	1.5175	502	297	­	1.69024	-0.430334	-2.47334	0.548322
	Zircon-32	0	44.9	0.059	1.19	3.26	0.753	22.5	8.59	116.8	49.1	243.9	582	126.4	620	3.1	1551	4.18	11530	2.435	348	522	­	0.666667	-0.047252	-2.14375	0.268684
	Zircon-33	1.26	211	1.3	14.1	17.1	3.55	73.6	23.6	264	93.5	392	692	131.8	1000	7.9	3070	6.32	9180	11.4	654	740	­	0.883784	0.029126	-2.03939	0.305801
	Zircon-34	0.37	21.3	0.59	8	13.5	5.25	54.3	17	186	68.3	285	507	98.5	2800	6.2	2000	2.48	8740	0.76	102	130	­	0.784615	-0.591065	-2.31056	0.59257
	Zircon-35	0	16.7	0.151	2.2	3.71	0.478	18.7	6.13	72.9	27.5	122.2	247	48.6	1400	8.1	828	3.05	9140	2.5875	123	123	­	1	-0.302792	-1.9084	0.175375
	Zircon-36	0.265	29.6	0.259	3	3.32	1.67	17.9	6.79	84.3	35.8	174.4	418	93	1100	5.4	1136	2.86	12310	1.69	200	361	­	0.554017	-0.063669	-2.16481	0.662016
	Zircon-37	0.094	94.3	1.01	18.2	31.2	10.7	154	49.8	544	193	794	1342	256	1700	8.4	7540	4.76	8670	1.645	443	345	­	1.28406	-0.589933	-2.45015	0.47173
	Zircon-38	0.46	16.11	0.568	8.16	12.54	4.26	51.7	15.17	162.9	55.8	238.2	460	96.8	1830	4.1	1721	1.37	11080	7.025	265	470	­	0.56383	0.00934	-2.52604	0.511285
	Zircon-39	72.2	226	29.6	151	44.7	0.92	83.7	22	236.7	87.5	363	636	121.4	6100	0	2510	6.7	12150	2.4975	238	477	­	0.498952	-0.124939	-1.97738	0.045964
	Zircon-40	21.6	142.5	8.13	44	28.4	8.59	114.5	36.5	418	154.7	672	1222	249	7800	8	6040	6.62	8860	4.525	1304	880	­	1.48182	-0.142589	-2.26621	0.46034
	Zircon-41	0.0063	2.74	0.038	0.96	2.26	0.353	13.21	4.51	52.3	20.05	91	194.5	41.4	110	0	616	1.13	10190	4.65	86	326	­	0.263804	0.224298	-2.23584	0.197432
	Zircon-42	0.0065	4.86	0.051	0.9	1.8	0.446	8.85	3.35	46.3	18.92	95.4	247	58.7	300	2.8	613	1.08	9420	2.29	52	133	­	0.390977	-0.268845	-2.35927	0.341487
	Zircon-43	0.46	10.6	0.277	3.39	5.08	1.38	24.8	7.21	75.1	24.7	103.5	183.1	37.5	1000	0.7	778	1.64	10680	4.45	113	327	­	0.345566	0.251859	-2.04784	0.375724
	Zircon-44	3.04	76.4	1.17	8.22	11.46	3.5	55.3	19.4	242	96.1	455	1005	211.4	2300	6.9	3970	4.87	11910	4	980	922	­	1.06291	-0.037435	-2.31464	0.424874
	Zircon-45	0.042	37.4	0.212	3.88	8.62	1.7	45.6	14.71	167.4	59.9	270	560	113.4	80	5.6	1898	3.11	12650	22.875	864	2782	­	0.310568	0.696169	-2.25543	0.262036
	Zircon-46	1.35	17.2	0.42	2.53	3.02	0.828	15.57	5.37	64.5	25.5	125.4	295	64.5	700	3	844	1.42	10490	8.8	370	608	­	0.608553	0.314082	-2.31753	0.369003
	Zircon-47	0.028	26.9	0.098	1.67	2.96	0.86	16.75	5.85	77.8	32.7	164.3	402	87.7	830	4.1	1081	2.78	9980	12.25	647	891	­	0.72615	0.345652	-2.16018	0.373244
	Zircon-48	0.59	109.1	0.302	3.64	5.3	1.1	37	13.31	169.9	69.2	322	720	147.8	500	4.5	2250	9.26	12990	6.275	3284	2611	­	1.25776	0.559474	-1.89072	0.24005
	Zircon-49	1.86	18.9	0.9	7.2	7.27	1.1	36.9	11.58	135	47.9	210.5	373	72.2	1710	7.9	1470	1.43	9150	3.5425	225	294	­	0.765306	-0.103362	-2.41637	0.205239
	Zircon-50	25.1	97.3	17.1	96.3	24.9	6.98	27.9	6.31	66.5	25.8	123.6	305	69.9	700	25.5	829	1.2	7020	0.73	126	112	­	1.125	-0.435082	-2.40512	0.809284
	Zircon-51	0.015	17.37	0.056	0.96	2.1	0.802	11.88	4.18	55.8	22.01	109.5	264	59.7	910	4.3	725	1.68	11030	6.41	350	447	­	0.782998	0.228704	-2.1963	0.490686
	Zircon-52	0.43	20.5	0.104	0.85	1.82	0.227	9.27	3.03	37	14.5	67.9	148.3	30.4	740	23	455	1.83	9980	3.0325	157	272	­	0.577206	0.263428	-1.90869	0.168888
	Zircon-53	0.049	24.9	0.096	1.38	2.47	1	14.77	4.99	59.5	24.43	117.7	298.6	68.6	970	1.6	792	3.27	10260	9.175	461	899	­	0.512792	0.47867	-1.96054	0.505951
	Zircon-54	32.4	139	9.9	45.5	14.5	1.4	48.5	17.1	222	91.5	426	870	170.3	4900	3.8	3490	10.78	12020	5.75	752	1210	­	0.621488	0.143266	-1.9069	0.161332
	Zircon-55	10.8	72	3.55	19.8	11.55	1.7	47.9	15.84	193.2	73.9	330	651	130.5	790	78	2218	4.8	10240	121.25	308	509	­	0.605108	-0.106863	-2.13234	0.22087
	Zircon-56	6.5	84.7	2.51	17	16.4	5	62.2	19.6	235	87.5	404	869	181	2220	7.3	3380	5.87	10000	4.425	852	990	­	0.860606	0.056615	-2.17038	0.47841
	Zircon-57	215	740	144	830	271	48.3	295	48.4	328	73.8	238	340	62.2	7400	182	2940	3.18	8690	4.2325	123	162	­	0.759259	-0.321964	-2.02905	0.522034
	Zircon-58	3.1	16.1	1.06	6.5	5.31	0.66	26.2	8.55	102.3	38.7	169.9	300	59	1140	7.7	1154	0.55	10050	2.345	96	140	­	0.685714	-0.330993	-2.73676	0.170999
	Zircon-59	0.123	6.22	0.105	1.21	1.76	0.87	8.97	2.85	35.3	14.27	68.4	173.4	40.4	1200	0.5	455	0.495	8490	1.6425	67	119	­	0.563025	-0.163502	-2.54444	0.669136
	Zircon-60	0	1.49	0.036	0.94	4.31	0.222	44.3	19.9	264	95.9	387	651	119.1	2630	0	3750	1.91	13300	21.975	135	949	­	0.142255	0.163685	-2.53255	0.049098
	Zircon-61	0.76	69.7	0.76	5.89	5.57	0.87	29	11.7	160.9	73.6	384	938	199.3	740	9.7	2920	22.9	10990	17.1	5739	5509	­	1.04175	0.76887	-1.61237	0.20919
	Zircon-62	0.0018	2.45	0.07	1.31	2.27	0.702	12.8	4.75	61.8	25.1	120.3	281	59.9	590	6	797	0.51	8370	1.83	48	112	­	0.428571	-0.399488	-2.74114	0.397985
	Zircon-63	0.017	18.6	0.201	3.35	5.15	1.29	23.1	7.55	85.7	31.6	141.1	291	61.3	-130	5.4	972	1.88	9860	3.33	190	256	­	0.742188	-0.055653	-2.18974	0.361433
	Zircon-64	0.02	1.2	0.04	0.67	1.78	0.245	13.77	5.53	71.4	30.1	145.2	319	69.5	630	9.3	887	1.047	9980	3.87	38	187	­	0.203209	-0.231949	-2.48384	0.15123
	Zircon-65	12.3	32	3.9	19.3	9	1.81	32.2	9.22	99.6	36.8	157.5	303	61.8	1500	13.2	1095	1.12	9070	1.915	181	383	­	0.472585	0.101756	-2.43222	0.32492
	Zircon-66	4.7	17.3	1.08	3.5	1.67	0.383	4.4	1.43	18.9	7.35	35.7	93.1	21.29	530	14.3	237	1.22	11730	2.45	71	237	­	0.299578	0.405799	-1.88259	0.431779
	Zircon-67	97	201	25.2	102	26.3	4.54	47.3	13.4	161	61.7	277	553	108.1	3820	34.3	1850	9.54	11110	15.975	359	804	­	0.446517	0.162531	-1.76318	0.393364
	Zircon-68	0.62	17.6	0.36	4.06	6.04	1.71	32.7	11.45	133.3	50.7	226	406	82.8	740	7.7	1491	0.95	9320	4.325	139	248	­	0.560484	-0.214074	-2.6308	0.371836
	Zircon-69	1.13	26.6	0.92	10.4	15.4	4.84	76.9	22.7	237	78	304	478	89.5	590	6.7	2230	1.7	8320	4.6825	330	309	­	1.06796	-0.189469	-2.44898	0.429803
	Zircon-70	0	9.7	0.024	0.69	1.8	0.23	13.35	5.22	69.6	28	128.2	251.5	50	850	1.7	825	3.89	10210	59.025	80	164	­	0.487805	-0.185694	-1.81059	0.143383
	Zircon-71	2	9.8	0.72	2.7	3.1	0.74	16.3	7.4	82.6	36.8	168	398	86.4	800	12	1040	3.9	9490	38.75	52	313	­	0.166134	-0.104339	-2.00882	0.31813
	Zircon-72	78	191	19.9	83	14.3	1.56	25	6.64	73.8	27.6	126.2	256	54.7	2480	84	834	2.96	7240	11.3	393	592	­	0.663851	0.364082	-1.93695	0.252136
	Zircon-73	23.8	137	8.3	61	47.5	2.82	168	49.9	531	177.2	714	1130	205.1	700	21.8	6340	33	7560	87.75	453	477	­	0.949686	-0.37456	-1.53456	0.096471
	Zircon-74	2.13	56.6	0.8	6.5	7.8	1.92	39.6	13.38	157.5	58.5	254.7	465	91.2	670	8.2	1738	4.68	10110	5.6975	427	496	­	0.860887	0.028029	-1.99721	0.333852
	Zircon-75	0.054	5.81	0.098	2.23	5.02	0.208	29	9.83	115.1	43.7	178	311	60.3	-410	3.2	1190	2.84	11240	1.3025	111	227	­	0.488987	-0.136735	-2.03944	0.052682
	Zircon-76	0.67	19.12	0.256	3.17	7.39	0.529	48.1	16.99	211.1	80.3	344	578	108.6	550	3.7	2253	9	10010	3.3025	386	711	­	0.542897	0.089942	-1.80768	0.085745
	Zircon-77	3.43	17.08	1.38	7.41	4.61	0.669	23.4	7.91	94.3	38.6	184.4	416	88.2	1600	0	1246	2.79	11280	14.875	317	1004	­	0.315737	0.38264	-2.17349	0.196841
	Zircon-78	3.2	28.6	0.93	5.4	2.84	0.93	11.7	4.17	51.3	19.9	100.3	254	57.6	1040	16.5	676	2.33	9310	7.7	3965	1765	­	2.24646	0.841911	-2.03748	0.493036
	Zircon-79	25.5	204	23.5	188	128	23.3	282	69.7	659	211	841	1474	287.1	3030	6	8930	9.8	10070	3.5325	940	720	­	1.30556	-0.311165	-2.17727	0.374778
	Zircon-80	10.3	55.2	3.01	15.4	8.4	1.62	38	11.68	147.9	55.4	251	495	99.9	1700	5.2	1720	3.31	9940	5.65	307	373	­	0.823056	-0.122896	-2.17478	0.277096
	Zircon-81	0.46	17.8	0.129	1.63	2.45	0.81	12.4	4.1	45.8	17.61	79.8	180.3	40.9	700	0	567	1.59	9760	2.4625	198	232	­	0.853448	0.109492	-2.0546	0.449095
	Zircon-82	0	24.64	0.096	1.79	4.85	1.76	26.4	9.11	108.5	41.5	185.5	388	79.1	150	4	1246	1.62	8700	2.2075	136	228	­	0.596491	-0.230897	-2.37932	0.475321
	Zircon-83	0.303	17.9	0.254	3.45	5.41	1.59	22.9	7.64	85.4	30.5	127.6	251	51	490	7.7	901	2.01	9330	3.65	193	268	­	0.720149	0.028461	-2.09648	0.436544
	Zircon-84	0.065	14.55	0.082	1.24	2.16	0.77	12.7	4.49	56.2	23.2	117.7	294	67.2	720	4.6	762	1.51	9800	5.775	258	436	­	0.591743	0.171139	-2.28937	0.449272
	Zircon-85	0.116	11.71	0.148	1.47	2.24	0.754	13.81	4.62	59.2	24.5	120.4	295	67.3	10	6.5	794	1.44	9780	4.91	174	345	­	0.504348	0.067997	-2.31146	0.414284
	Zircon-86	2.52	24.6	1.1	8.62	10.1	2.52	52	17.77	191.9	72	316	602	120.4	1000	6.9	2170	1.86	10050	7	383	507	­	0.755424	-0.074589	-2.51008	0.336036
	Zircon-87	0	5.11	0.075	1.52	5.07	0.94	34.5	12.41	149.7	57	259	523	111.3	600	2.1	1705	1.58	10170	8.75	230	570	­	0.403509	0.037373	-2.51985	0.217201
	Zircon-88	0.84	25.4	0.28	1.48	1.46	0.578	8.4	2.57	30.2	11.93	56	127.6	29.8	620	3.4	400	1.83	10740	1.9225	144	191	­	0.753927	0.175183	-1.8434	0.504382
	Sample: Yaq-49 (EL Salto Formation sandstone)
	Zircon-01	0.01	22.9	0.178	3.22	6.71	0.367	38.3	13.33	157	58.4	259	461	90.8	-3300	2.2	1680	3.45	9390	103.75	167	368	­	0.453804	-0.097853	-2.12588	0.06996
	Zircon-02	0.0084	25.8	0.139	2.34	6.05	1.91	30	10.64	125.7	47.2	212.2	399	79.9	900	7	1398	2.7	9410	0.85	107	161	­	0.664596	-0.394147	-2.16961	0.433254
	Zircon-03	9.4	56.7	2.7	14.4	6.5	1.5	24.5	7.1	79.9	28.2	125.9	248	51.2	2300	10.2	893	2.98	10850	3.735	259	349	­	0.74212	0.148374	-1.92023	0.363244
	Zircon-04	32.4	90	9.8	51.2	13.6	1.48	32.6	8.49	85	28.7	119.9	210.8	40.5	17200	14.9	870	0.78	9940	3.45	153	248	­	0.616935	0.070581	-2.43178	0.214798
	Zircon-05	0.47	28.5	0.69	10.6	20	2.68	130.6	44.4	535	197.4	817	1263	231	1500	0	7000	15.6	9670	11.95	325	593	­	0.548061	-0.328349	-1.90828	0.160249
	Zircon-06	0.22	12.93	0.068	1.39	1.95	0.681	10.74	3.74	48.5	20.6	104.8	255	59.7	2000	4.7	675	1.26	9930	3.0625	122	229	­	0.532751	-0.046705	-2.30617	0.454753
	Zircon-07	0.367	27.9	0.478	5.91	8.8	3	30.5	8.6	81	28.3	126	280	64.7	1400	3.7	920	1.97	8440	114.5	336	372	­	0.903226	0.123385	-2.15269	0.5596
	Zircon-08	0.85	345	1.04	15.8	29.4	8.44	144.6	48.9	582	217	973	1817	354	3300	11.3	8640	25.7	8840	8.925	7723	2913	­	2.65122	0.204986	-1.84942	0.395578
	Zircon-09	0.0017	73.3	0.094	1.69	4.24	1.57	30.9	11.95	156.5	67.6	340	826	182.2	1100	2	2210	7.25	10320	4.245	1056	823	­	1.28311	-0.00158	-2.05664	0.419165
	Zircon-10	0.13	22.67	1.74	26.9	32.7	11.73	107.9	27	235	64.7	222	304	54.6	2400	4.2	1908	2.58	8720	5.3275	257	357	­	0.719888	0.069795	-2.07125	0.603477
	Zircon-11	0.254	43.4	0.419	5.95	10.5	3.96	54.4	18.8	232	91	419	865	179.8	3000	14.6	3360	2.79	9090	2.165	419	462	­	0.906926	-0.272374	-2.49141	0.506347
	Zircon-12	0	111.5	0.082	1.59	4.92	0.454	38.2	15.73	212.6	87.6	407	768	146.7	3600	2.8	3020	18.95	11420	3.5125	696	635	­	1.09606	-0.082587	-1.60775	0.101202
	Zircon-13	2.9	19.8	0.43	2.82	3.83	0.098	23.3	8.17	97.8	36.5	157	278	52.4	1400	7	1036	5.93	10260	1.8275	135	355	­	0.380282	0.106184	-1.67099	0.031703
	Zircon-14	0.39	32.7	0.154	1.4	2.45	0.516	16.75	6.43	86	35.4	176.5	405	86.6	2200	4.4	1136	4.15	10530	2.5325	365	512	­	0.712891	0.101815	-1.98941	0.246154
	Zircon-15	3.9	30.7	1.07	9.4	9.3	1.4	49.7	18.2	226	93.8	452	951	202	5200	0	3560	3.78	9320	20.3	603	911	­	0.66191	-0.018662	-2.40069	0.199001
	Zircon-16	0.019	13.41	0.105	2	4.88	1.18	25.4	9.63	118.6	45.3	211	424	85.2	1400	0	1367	2.33	11120	287	309	966	­	0.319876	0.357611	-2.26001	0.323894
	Zircon-18	0.071	11.51	0.088	1.82	3.42	0.92	16.8	5.54	66.7	26.4	125	292	66.7	400	4.2	827	1.06	10500	5.0075	162	322	­	0.503106	0.042473	-2.44008	0.370909
	Zircon-19	0.79	14.96	0.169	2.5	4.53	1.28	25	8.15	98.7	39	178	355	75.9	1200	3.5	1168	1.45	9480	5.075	207	411	­	0.50365	0.063613	-2.38886	0.367569
	Zircon-20	0.031	12.12	0.185	2.84	4.67	1.68	19.7	6.04	69.5	25.5	122.1	286	62.2	1300	6.6	844	0.831	10020	3.84	196	252	­	0.777778	-0.054965	-2.53676	0.53526
	Zircon-21	0.0025	1.61	0.038	0.87	2.93	0.245	20.5	7.31	89.8	34.7	157.9	306	64.7	1700	0	1050	1.21	9920	4.0125	67	230	­	0.291304	-0.123994	-2.40294	0.096606
	Zircon-22	0.035	15.9	0.057	0.95	2.36	0.97	13	4.94	65.7	27.9	149	444	109.7	900	2.2	934	1.17	15640	38.5	555	4763	­	0.116523	1.0305	-2.5792	0.53517
	Zircon-23	6.6	78.6	2.22	14	16.4	2.44	73.5	26	310	118.4	537	1100	219	3400	1.3	4720	10	10210	27.925	2661	4225	­	0.629822	0.584434	-2.04139	0.214769
	Zircon-24	0.44	10.74	0.215	2.24	2.49	0.469	12.09	3.82	45.5	16.99	77.4	164.8	34	800	7520	525	10.6	9200	3.21	94	189	­	0.497354	0.059505	-1.19165	0.261221
	Zircon-25	0.025	21.89	0.093	1.45	2.69	0.941	13.46	4.2	45.5	16.67	74.2	165.6	36.5	1020	2.8	546	1.9	10420	2.8025	279	295	­	0.945763	0.250762	-1.94031	0.477902
	Zircon-26	0.0108	11.21	0.071	1.17	3.12	0.627	20.1	6.95	83.2	31.9	152.5	340	75.6	1100	0.39	1035	1.12	11840	7.625	222	517	­	0.4294	0.182012	-2.48226	0.241958
	Zircon-27	14.2	50.4	5.5	31.5	22.9	1.54	84.9	24.09	254	85.4	330.1	507	90.1	2000	6.8	2428	8.5	8380	1.935	357	436	­	0.818807	-0.065521	-1.77559	0.106732
	Zircon-28	4.7	25	0.95	4.2	3.02	0.88	12.95	4.45	53.6	22.2	109.6	270.9	61.7	1000	44	720	1.6	9960	7.225	348	514	­	0.677043	0.278154	-2.22869	0.430023
	Zircon-29	0.0134	5.77	0.0118	0.5	1.36	0.268	6.92	2.57	32.9	13.89	68.5	175.4	39.1	200	520	459	1.49	11870	6.675	149	407	­	0.366093	0.365565	-2.07084	0.266968
	Zircon-30	0.03	3.71	0.081	1.45	4.49	0.129	31.3	12.98	160.7	62.4	275	503	94	2100	0	1884	1.18	10370	181.25	98	612	­	0.160131	0.085183	-2.62969	0.033254
	Zircon-31	0.026	59.4	0.337	5.7	10.6	4.18	51.2	16.7	199	79.5	358	800	172	2000	7.1	3010	2.69	8700	1.5175	502	297	­	1.69024	-0.430334	-2.47334	0.548322
	Zircon-32	0	44.9	0.059	1.19	3.26	0.753	22.5	8.59	116.8	49.1	243.9	582	126.4	620	3.1	1551	4.18	11530	2.435	348	522	­	0.666667	-0.047252	-2.14375	0.268684
	Zircon-33	1.26	211	1.3	14.1	17.1	3.55	73.6	23.6	264	93.5	392	692	131.8	1000	7.9	3070	6.32	9180	11.4	654	740	­	0.883784	0.029126	-2.03939	0.305801
	Zircon-34	0.37	21.3	0.59	8	13.5	5.25	54.3	17	186	68.3	285	507	98.5	2800	6.2	2000	2.48	8740	0.76	102	130	­	0.784615	-0.591065	-2.31056	0.59257
	Zircon-35	0	16.7	0.151	2.2	3.71	0.478	18.7	6.13	72.9	27.5	122.2	247	48.6	1400	8.1	828	3.05	9140	2.5875	123	123	­	1	-0.302792	-1.9084	0.175375
	Zircon-36	0.265	29.6	0.259	3	3.32	1.67	17.9	6.79	84.3	35.8	174.4	418	93	1100	5.4	1136	2.86	12310	1.69	200	361	­	0.554017	-0.063669	-2.16481	0.662016
	Zircon-37	0.094	94.3	1.01	18.2	31.2	10.7	154	49.8	544	193	794	1342	256	1700	8.4	7540	4.76	8670	1.645	443	345	­	1.28406	-0.589933	-2.45015	0.47173
	Zircon-38	0.46	16.11	0.568	8.16	12.54	4.26	51.7	15.17	162.9	55.8	238.2	460	96.8	1830	4.1	1721	1.37	11080	7.025	265	470	­	0.56383	0.00934	-2.52604	0.511285
	Zircon-39	72.2	226	29.6	151	44.7	0.92	83.7	22	236.7	87.5	363	636	121.4	6100	0	2510	6.7	12150	2.4975	238	477	­	0.498952	-0.124939	-1.97738	0.045964
	Zircon-40	21.6	142.5	8.13	44	28.4	8.59	114.5	36.5	418	154.7	672	1222	249	7800	8	6040	6.62	8860	4.525	1304	880	­	1.48182	-0.142589	-2.26621	0.46034
	Zircon-41	0.0063	2.74	0.038	0.96	2.26	0.353	13.21	4.51	52.3	20.05	91	194.5	41.4	110	0	616	1.13	10190	4.65	86	326	­	0.263804	0.224298	-2.23584	0.197432
	Zircon-42	0.0065	4.86	0.051	0.9	1.8	0.446	8.85	3.35	46.3	18.92	95.4	247	58.7	300	2.8	613	1.08	9420	2.29	52	133	­	0.390977	-0.268845	-2.35927	0.341487
	Zircon-43	0.46	10.6	0.277	3.39	5.08	1.38	24.8	7.21	75.1	24.7	103.5	183.1	37.5	1000	0.7	778	1.64	10680	4.45	113	327	­	0.345566	0.251859	-2.04784	0.375724
	Zircon-44	3.04	76.4	1.17	8.22	11.46	3.5	55.3	19.4	242	96.1	455	1005	211.4	2300	6.9	3970	4.87	11910	4	980	922	­	1.06291	-0.037435	-2.31464	0.424874
	Zircon-45	0.042	37.4	0.212	3.88	8.62	1.7	45.6	14.71	167.4	59.9	270	560	113.4	80	5.6	1898	3.11	12650	22.875	864	2782	­	0.310568	0.696169	-2.25543	0.262036
	Zircon-46	1.35	17.2	0.42	2.53	3.02	0.828	15.57	5.37	64.5	25.5	125.4	295	64.5	700	3	844	1.42	10490	8.8	370	608	­	0.608553	0.314082	-2.31753	0.369003
	Zircon-47	0.028	26.9	0.098	1.67	2.96	0.86	16.75	5.85	77.8	32.7	164.3	402	87.7	830	4.1	1081	2.78	9980	12.25	647	891	­	0.72615	0.345652	-2.16018	0.373244
	Zircon-48	0.59	109.1	0.302	3.64	5.3	1.1	37	13.31	169.9	69.2	322	720	147.8	500	4.5	2250	9.26	12990	6.275	3284	2611	­	1.25776	0.559474	-1.89072	0.24005
	Zircon-49	1.86	18.9	0.9	7.2	7.27	1.1	36.9	11.58	135	47.9	210.5	373	72.2	1710	7.9	1470	1.43	9150	3.5425	225	294	­	0.765306	-0.103362	-2.41637	0.205239
	Zircon-50	25.1	97.3	17.1	96.3	24.9	6.98	27.9	6.31	66.5	25.8	123.6	305	69.9	700	25.5	829	1.2	7020	0.73	126	112	­	1.125	-0.435082	-2.40512	0.809284
	Zircon-51	0.015	17.37	0.056	0.96	2.1	0.802	11.88	4.18	55.8	22.01	109.5	264	59.7	910	4.3	725	1.68	11030	6.41	350	447	­	0.782998	0.228704	-2.1963	0.490686
	Zircon-52	0.43	20.5	0.104	0.85	1.82	0.227	9.27	3.03	37	14.5	67.9	148.3	30.4	740	23	455	1.83	9980	3.0325	157	272	­	0.577206	0.263428	-1.90869	0.168888
	Zircon-53	0.049	24.9	0.096	1.38	2.47	1	14.77	4.99	59.5	24.43	117.7	298.6	68.6	970	1.6	792	3.27	10260	9.175	461	899	­	0.512792	0.47867	-1.96054	0.505951
	Zircon-54	32.4	139	9.9	45.5	14.5	1.4	48.5	17.1	222	91.5	426	870	170.3	4900	3.8	3490	10.78	12020	5.75	752	1210	­	0.621488	0.143266	-1.9069	0.161332
	Zircon-55	10.8	72	3.55	19.8	11.55	1.7	47.9	15.84	193.2	73.9	330	651	130.5	790	78	2218	4.8	10240	121.25	308	509	­	0.605108	-0.106863	-2.13234	0.22087
	Zircon-56	6.5	84.7	2.51	17	16.4	5	62.2	19.6	235	87.5	404	869	181	2220	7.3	3380	5.87	10000	4.425	852	990	­	0.860606	0.056615	-2.17038	0.47841
	Zircon-57	215	740	144	830	271	48.3	295	48.4	328	73.8	238	340	62.2	7400	182	2940	3.18	8690	4.2325	123	162	­	0.759259	-0.321964	-2.02905	0.522034
	Zircon-58	3.1	16.1	1.06	6.5	5.31	0.66	26.2	8.55	102.3	38.7	169.9	300	59	1140	7.7	1154	0.55	10050	2.345	96	140	­	0.685714	-0.330993	-2.73676	0.170999
	Zircon-59	0.123	6.22	0.105	1.21	1.76	0.87	8.97	2.85	35.3	14.27	68.4	173.4	40.4	1200	0.5	455	0.495	8490	1.6425	67	119	­	0.563025	-0.163502	-2.54444	0.669136
	Zircon-60	0	1.49	0.036	0.94	4.31	0.222	44.3	19.9	264	95.9	387	651	119.1	2630	0	3750	1.91	13300	21.975	135	949	­	0.142255	0.163685	-2.53255	0.049098
	Zircon-61	0.76	69.7	0.76	5.89	5.57	0.87	29	11.7	160.9	73.6	384	938	199.3	740	9.7	2920	22.9	10990	17.1	5739	5509	­	1.04175	0.76887	-1.61237	0.20919
	Zircon-62	0.0018	2.45	0.07	1.31	2.27	0.702	12.8	4.75	61.8	25.1	120.3	281	59.9	590	6	797	0.51	8370	1.83	48	112	­	0.428571	-0.399488	-2.74114	0.397985
	Zircon-63	0.017	18.6	0.201	3.35	5.15	1.29	23.1	7.55	85.7	31.6	141.1	291	61.3	-130	5.4	972	1.88	9860	3.33	190	256	­	0.742188	-0.055653	-2.18974	0.361433
	Zircon-64	0.02	1.2	0.04	0.67	1.78	0.245	13.77	5.53	71.4	30.1	145.2	319	69.5	630	9.3	887	1.047	9980	3.87	38	187	­	0.203209	-0.231949	-2.48384	0.15123
	Zircon-65	12.3	32	3.9	19.3	9	1.81	32.2	9.22	99.6	36.8	157.5	303	61.8	1500	13.2	1095	1.12	9070	1.915	181	383	­	0.472585	0.101756	-2.43222	0.32492
	Zircon-66	4.7	17.3	1.08	3.5	1.67	0.383	4.4	1.43	18.9	7.35	35.7	93.1	21.29	530	14.3	237	1.22	11730	2.45	71	237	­	0.299578	0.405799	-1.88259	0.431779
	Zircon-67	97	201	25.2	102	26.3	4.54	47.3	13.4	161	61.7	277	553	108.1	3820	34.3	1850	9.54	11110	15.975	359	804	­	0.446517	0.162531	-1.76318	0.393364
	Zircon-68	0.62	17.6	0.36	4.06	6.04	1.71	32.7	11.45	133.3	50.7	226	406	82.8	740	7.7	1491	0.95	9320	4.325	139	248	­	0.560484	-0.214074	-2.6308	0.371836
	Zircon-69	1.13	26.6	0.92	10.4	15.4	4.84	76.9	22.7	237	78	304	478	89.5	590	6.7	2230	1.7	8320	4.6825	330	309	­	1.06796	-0.189469	-2.44898	0.429803
	Zircon-70	0	9.7	0.024	0.69	1.8	0.23	13.35	5.22	69.6	28	128.2	251.5	50	850	1.7	825	3.89	10210	59.025	80	164	­	0.487805	-0.185694	-1.81059	0.143383
	Zircon-71	2	9.8	0.72	2.7	3.1	0.74	16.3	7.4	82.6	36.8	168	398	86.4	800	12	1040	3.9	9490	38.75	52	313	­	0.166134	-0.104339	-2.00882	0.31813
	Zircon-72	78	191	19.9	83	14.3	1.56	25	6.64	73.8	27.6	126.2	256	54.7	2480	84	834	2.96	7240	11.3	393	592	­	0.663851	0.364082	-1.93695	0.252136
	Zircon-73	23.8	137	8.3	61	47.5	2.82	168	49.9	531	177.2	714	1130	205.1	700	21.8	6340	33	7560	87.75	453	477	­	0.949686	-0.37456	-1.53456	0.096471
	Zircon-74	2.13	56.6	0.8	6.5	7.8	1.92	39.6	13.38	157.5	58.5	254.7	465	91.2	670	8.2	1738	4.68	10110	5.6975	427	496	­	0.860887	0.028029	-1.99721	0.333852
	Zircon-75	0.054	5.81	0.098	2.23	5.02	0.208	29	9.83	115.1	43.7	178	311	60.3	-410	3.2	1190	2.84	11240	1.3025	111	227	­	0.488987	-0.136735	-2.03944	0.052682
	Zircon-76	0.67	19.12	0.256	3.17	7.39	0.529	48.1	16.99	211.1	80.3	344	578	108.6	550	3.7	2253	9	10010	3.3025	386	711	­	0.542897	0.089942	-1.80768	0.085745
	Zircon-77	3.43	17.08	1.38	7.41	4.61	0.669	23.4	7.91	94.3	38.6	184.4	416	88.2	1600	0	1246	2.79	11280	14.875	317	1004	­	0.315737	0.38264	-2.17349	0.196841
	Zircon-78	3.2	28.6	0.93	5.4	2.84	0.93	11.7	4.17	51.3	19.9	100.3	254	57.6	1040	16.5	676	2.33	9310	7.7	3965	1765	­	2.24646	0.841911	-2.03748	0.493036
	Zircon-79	25.5	204	23.5	188	128	23.3	282	69.7	659	211	841	1474	287.1	3030	6	8930	9.8	10070	3.5325	940	720	­	1.30556	-0.311165	-2.17727	0.374778
	Zircon-80	10.3	55.2	3.01	15.4	8.4	1.62	38	11.68	147.9	55.4	251	495	99.9	1700	5.2	1720	3.31	9940	5.65	307	373	­	0.823056	-0.122896	-2.17478	0.277096
	Zircon-81	0.46	17.8	0.129	1.63	2.45	0.81	12.4	4.1	45.8	17.61	79.8	180.3	40.9	700	0	567	1.59	9760	2.4625	198	232	­	0.853448	0.109492	-2.0546	0.449095
	Zircon-82	0	24.64	0.096	1.79	4.85	1.76	26.4	9.11	108.5	41.5	185.5	388	79.1	150	4	1246	1.62	8700	2.2075	136	228	­	0.596491	-0.230897	-2.37932	0.475321
	Zircon-83	0.303	17.9	0.254	3.45	5.41	1.59	22.9	7.64	85.4	30.5	127.6	251	51	490	7.7	901	2.01	9330	3.65	193	268	­	0.720149	0.028461	-2.09648	0.436544
	Zircon-84	0.065	14.55	0.082	1.24	2.16	0.77	12.7	4.49	56.2	23.2	117.7	294	67.2	720	4.6	762	1.51	9800	5.775	258	436	­	0.591743	0.171139	-2.28937	0.449272
	Zircon-85	0.116	11.71	0.148	1.47	2.24	0.754	13.81	4.62	59.2	24.5	120.4	295	67.3	10	6.5	794	1.44	9780	4.91	174	345	­	0.504348	0.067997	-2.31146	0.414284
	Zircon-86	2.52	24.6	1.1	8.62	10.1	2.52	52	17.77	191.9	72	316	602	120.4	1000	6.9	2170	1.86	10050	7	383	507	­	0.755424	-0.074589	-2.51008	0.336036
	Zircon-87	0	5.11	0.075	1.52	5.07	0.94	34.5	12.41	149.7	57	259	523	111.3	600	2.1	1705	1.58	10170	8.75	230	570	­	0.403509	0.037373	-2.51985	0.217201
	Zircon-88	0.84	25.4	0.28	1.48	1.46	0.578	8.4	2.57	30.2	11.93	56	127.6	29.8	620	3.4	400	1.83	10740	1.9225	144	191	­	0.753927	0.175183	-1.8434	0.504382
	Sample: Yaq-43 (EL Salto Formation sandstone)
	Zircon-01	3.55	20.7	0.8	3.66	2.29	0.523	10.81	3.8	48.2	19.52	96.5	233.4	50.6	790	7.2	631	1.81	10580	3.485	125	284	­	0.440141	0.085217	-2.11042	0.321232
	Zircon-02	4.73	26	1.38	7.32	5.71	1.55	25	8	90	33.9	156.2	338	72	280	37	1099	1.72	9630	3.275	207	254	­	0.814961	-0.124083	-2.29339	0.396452
	Zircon-03	2.2	26.2	0.56	2.71	1.99	0.478	10.88	3.65	45.2	18.39	87.3	199	41.5	530	6.7	578	2.22	10530	2.625	176	253	­	0.695652	0.104267	-1.9525	0.313931
	Zircon-04	5.7	26.2	0.54	3.16	3.35	0.853	15.2	5.14	59.6	21.8	97.9	199.9	42.8	740	6.9	681	1.36	10000	1.765	128	165	­	0.775758	-0.083329	-2.16727	0.365302
	Zircon-05	0.151	41	0.056	1	2.5	1.34	16.92	6.39	88.2	39.6	213.7	599	145.1	270	4.2	1348	5.15	9330	29.85	705	766	­	0.920366	0.106802	-2.06562	0.629625
	Zircon-06	17.5	74	6.6	33.9	13.7	2.28	36	10.6	122.6	44.6	198	388	75.5	1320	3.3	1268	3.37	10670	67.75	147	319	­	0.460815	-0.085041	-2.0612	0.313741
	Zircon-07	0	22.5	0.031	0.75	1.86	0.32	12.41	4.56	55.4	22.88	109.2	242	51	1040	14.5	710	2.46	11220	6.8	188	242	­	0.77686	0	-1.99288	0.203542
	Zircon-08	0.276	54.2	0.224	2.19	2.58	1.13	13.6	5.04	66.3	26.5	139.3	384	89.1	490	10.3	927	6.1	9850	87.25	105	302	­	0.347682	-0.104324	-1.799	0.582971
	Zircon-09	24	59	5.1	18	4.2	0.95	12.8	3.89	48.1	20.02	100.2	257	58.5	4200	9.1	645	1.77	10870	5.825	311	500	­	0.622	0.289037	-2.16196	0.395951
	Zircon-10	0.112	34.4	0.457	7.15	12.93	4.46	65.3	21.6	249	91.2	401	788	161.9	510	6.5	2850	2.37	9130	1.195	224	241	­	0.929461	-0.514509	-2.52178	0.469058
	Zircon-11	0.236	27.7	0.097	1.03	1.78	0.58	11.64	4.26	47.2	17.9	76.7	156.2	31.6	350	7.7	548	1.195	9910	4.7	170	344	­	0.494186	0.342877	-2.11631	0.389394
	Zircon-12	0	21.8	0.062	1.25	2.37	0.794	13.73	4.9	63.6	26.72	135	339	75.8	230	8.6	858	2.32	8450	8.625	221	318	­	0.694969	-0.027773	-2.16471	0.425362
	Zircon-13	0	34.2	0.148	2.48	5.12	1.07	27.5	9.44	109.4	41.3	181.9	356	73.9	1130	6.4	1260	3.11	10080	5.525	441	453	­	0.97351	0.104648	-2.05869	0.275569
	Zircon-14	96	255	29.8	128	21.5	2.36	29.9	5.79	57.4	20.1	92.9	191.8	40	6700	10.2	630	3.04	11300	59.75	153	233	­	0.656652	0.084507	-1.79998	0.284449
	Zircon-15	0.45	6.33	0.205	1.8	3.31	0.364	21.9	7.22	89.9	34.9	153.7	269	52.8	220	6.5	1027	1.45	10200	5.375	121	284	­	0.426056	0.023566	-2.26838	0.130651
	Zircon-16	0.059	11.59	0.041	0.78	1.29	0.463	10.4	3.89	49.7	20.2	94.5	202	42.9	600	2.6	623	0.82	10310	2.725	77	110	­	0.7	-0.263959	-2.39154	0.386293
	Zircon-17	0.026	12.4	0.035	0.75	1.43	0.386	9.6	4.29	64.1	27.3	145	410	88.3	600	12.2	779	6.24	11810	208.75	58	1049	­	0.055291	0.407992	-1.8176	0.318369
	Zircon-18	0.088	61.7	0.247	2.71	4.9	1.05	26.7	9.24	111.2	43	197	406	80.5	320	6.5	1303	3.83	10690	10.45	569	1099	­	0.517743	0.432472	-2.02533	0.280532
	Zircon-19	0.069	9.27	0.034	0.5	1.06	0.212	6.98	2.66	36.5	16.2	81.9	198	43.1	-90	2.2	523	2.39	12060	6.3	124	503	­	0.246521	0.404903	-1.91827	0.238179
	Zircon-20	0	29	0.125	3.06	6.16	3.18	28.7	8.45	87.2	31.4	135.8	289	63.8	0	0	979	2.14	10090	5.525	110	490	­	0.22449	0.229298	-2.13048	0.730875
	Zircon-21	0.07	81	0.293	4.76	8.9	2.92	42	12.9	137	47.9	206	396	80.4	110	0.5	1480	5.41	9270	6.825	736	636	­	1.15723	0.205762	-1.8645	0.461541
	Zircon-22	0	27.2	0.105	1.85	3.54	1.18	17.4	5.8	69.6	26.9	125.8	301	67.8	490	2.8	888	2.98	10260	6.125	448	551	­	0.813067	0.262585	-2.00435	0.459466
	Zircon-23	1.61	144	1.18	13.8	17	5.01	62.2	18.5	199	72.8	316	619	121.6	440	20.1	2590	5.97	8770	128.5	539	602	­	0.895349	-0.012094	-2.01572	0.470832
	Zircon-24	10.7	57.3	2.78	14	6.74	1.36	25.8	7.7	88.6	35.2	161.5	358	75.6	1090	900	1099	5.16	9220	5.875	586	504	­	1.1627	0.148548	-1.84123	0.315171
	Zircon-25	0.15	34.2	0.124	1.79	3.08	0.88	16.6	5.97	77.7	32.7	161.8	388	86	50	72	1038	4.1	7740	8.6	272	293	­	0.928328	-0.121964	-1.97605	0.376098
	Zircon-26	0.012	7.3	0.058	0.62	1.59	0.37	8.65	3.13	36.7	14.78	72.9	180.2	40	60	2.2	490	0.96	10920	8.175	164	694	­	0.236311	0.585605	-2.27348	0.30489
	Zircon-27	0.03	15.68	0.05	0.69	1.55	0.085	8.65	3.5	45.2	17.29	81.9	162.5	31.3	-250	3.4	501	8.05	10580	14.4	37	79	­	0.468354	-0.313226	-1.30506	0.07094
	Zircon-28	15.5	32.2	1.8	7.11	2.23	0.72	8.27	2.91	35.1	16.1	76.2	194.1	45.5	4630	12.9	500	1.25	9770	4.705	156	317	­	0.492114	0.213034	-2.19112	0.512359
	Zircon-29	0	52.3	0.123	2.34	4.6	2.08	33.3	12.11	159.5	66.7	327	732	157.7	270	16.9	2160	4.21	7660	1.915	494	412	­	1.19903	-0.249614	-2.24023	0.513582
	Zircon-30	0.114	13.84	0.119	1.78	2.3	0.888	11.11	3.48	41.7	16.13	74.2	170.6	36.9	110	9.1	515	1.06	9020	2.125	134	193	­	0.694301	0.053578	-2.20667	0.536833
	Zircon-31	1.36	42.1	0.392	3.76	4.65	1.23	23.2	7.57	87.5	34.1	158.9	365	79.8	400	7.5	1116	4.34	9320	8.65	888	831	­	1.06859	0.357308	-1.9248	0.361895
	Zircon-32	0.0061	46.2	0.098	1.73	3.35	1.15	19	7.2	95.1	41	210	489	107.3	-60	3.9	1317	4.06	8290	13.925	469	526	­	0.891635	0.031677	-2.08078	0.4405
	Zircon-33	15.1	53.1	3.6	14.8	5.19	1.4	14.8	4.34	46.7	17.28	80	186.2	42.5	1150	1.8	561	1.99	9980	5.3075	223	396	­	0.563131	0.327716	-1.97113	0.488159
	Zircon-34	1.02	16.87	0.207	1.49	1.34	0.473	7.19	2.69	35.3	15.04	78.1	210	48.8	-90	1.5	494	1.48	10830	5.65	195	387	­	0.503876	0.265492	-2.15196	0.465684
	Zircon-35	13.8	53.5	2.4	10.7	3.31	0.702	11.34	4.06	52.4	22.4	113.2	291	68.2	780	3.6	746	2.79	10050	5.695	423	463	­	0.913607	0.201688	-2.01829	0.350158
	Zircon-36	3.3	20.6	1.24	6	3.33	0.601	13.97	4.55	53.1	19.66	92.9	208.7	47	740	4830	663	10.1	9830	10.3	305	686	­	0.444606	0.516802	-1.3152	0.269278
	Zircon-37	0.071	3.43	0.191	2.94	6.13	0.388	33.6	11.53	136.6	52.8	227	391	75.2	210	9.9	1532	1.02	9830	3.995	106	257	­	0.412451	-0.182244	-2.58358	0.082619
	Zircon-38	0.206	17.5	0.043	0.54	1.36	0.528	8.35	3.01	38.5	16.34	79.6	218.4	54	570	1.9	567	3.17	10600	5.8775	203	514	­	0.394942	0.37171	-1.83819	0.478816
	Zircon-39	0.185	20.42	0.367	5.63	10.09	0.157	54.3	18.59	221.7	82	346	545	98.7	-10	4.5	2334	7.25	7580	2.425	228	549	­	0.415301	0.003176	-1.87606	0.020498
	Zircon-40	0.026	49.7	0.07	1.58	4.64	1.15	36.9	14.88	199.1	82.5	390	791	162.1	790	2.6	2740	8.92	10770	4.995	569	1058	­	0.537807	0.126309	-1.94781	0.26858
	Zircon-41	2.17	23.2	0.67	4.62	5.4	0.722	25.7	8.4	101.1	40	186	379	75.5	640	12.5	1264	2.08	9490	4.425	295	447	­	0.659955	0.071668	-2.26058	0.187293
	Zircon-42	0.26	84	0.35	3.42	6.9	2.19	32.4	10.4	118	43.5	187	372	78.8	230	12.5	1330	3.95	11730	5.1	520	407	­	1.27764	0.039051	-1.97395	0.447605
	Zircon-43	0	13.57	0.0043	0.32	0.79	0.247	4.72	1.8	22.6	9.65	50.6	135.7	31.9	210	2.6	320	1.19	10850	3.8825	145	279	­	0.519713	0.313024	-2.05703	0.390895
	Zircon-44	0.044	16.93	0.036	1.66	3.97	0.199	30.2	12.53	158.2	64.2	287	529	102.8	410	28.5	1876	15.9	13300	190.5	248	880	­	0.281818	0.221027	-1.52206	0.055539
	Zircon-45	6.2	35.2	1.78	9.2	6.9	0.5	33.9	11.84	136.4	52.2	226.4	417	78.4	520	15	1490	6.17	6290	4.375	95	189	­	0.502646	-0.343674	-1.82985	0.099906
	Zircon-46	52.7	112	11.74	51.6	13.71	3.89	28.4	8.14	95	35.7	164.5	334	67	3760	140	1117	2.08	8610	7.95	227	349	­	0.65043	0.019079	-2.20568	0.602447
	Zircon-47	1.2	35.4	0.59	6.4	11.2	3.53	54.9	17.94	215	82.3	360	718	143.1	510	9.4	2530	2.5	9290	1.17	243	275	­	0.883636	-0.416792	-2.45818	0.435038
	Zircon-48	0.135	17.52	0.064	0.88	2.08	0.292	15.83	6.14	81.9	36.3	182.4	419	88.9	10	7	1180	1.75	11240	10.525	380	645	­	0.589147	0.187346	-2.37918	0.15551
	Zircon-49	0.91	235	1.44	20.4	33.3	11.02	158	50.8	558	200	822	1420	259	620	8.4	7760	14.8	9110	13.075	4417	2553	­	1.73012	0.254762	-1.98203	0.464278
	Zircon-50	4.5	38.9	1.22	6.5	4.19	1.32	16.8	5.91	78.4	32.7	156.1	390	88.9	440	18.4	1059	3.16	10350	12.85	599	1659	­	0.361061	0.628782	-2.09138	0.480795
	Zircon-51	6.14	30.7	1.46	7.26	4.78	1.16	20.3	6.28	73.2	27.7	126.8	272.8	57.6	670	10.5	864	1.87	9110	3.6025	221	322	­	0.686335	0.072012	-2.164	0.359868
	Zircon-52	1.02	80.1	0.73	9.55	13.71	4.62	62.8	20.5	236.8	88.9	400	795	160.9	640	11.5	3190	3.89	7960	11.125	644	463	­	1.39093	-0.234786	-2.31042	0.481162
	Zircon-53	0	5.96	0.026	0.91	2.44	0.698	13.03	4.58	53.3	21.71	104.8	244.4	55.4	-40	5.6	697	2.04	9860	8.6	238	675	­	0.352593	0.441203	-2.07847	0.378299
	Zircon-54	0.59	12.9	0.21	1.56	2.37	0.79	10.23	3.3	40.9	16.3	80.5	196	46.5	360	1.2	531	0.91	10620	2.7275	91	171	­	0.532164	-0.05926	-2.33322	0.490301
	Zircon-55	0	15.45	0.056	0.66	1.46	0.534	8.29	3.15	41.4	18.24	95.7	264	63.5	-160	3.8	617	1.88	9700	6.425	258	475	­	0.543158	0.25509	-2.14745	0.469067
	Zircon-56	22.1	53.8	5.61	24.5	7.72	1.25	20	6.25	71.9	27.7	125.8	243.7	49.8	1400	36	818	3.51	10370	34.35	70	119	­	0.588235	-0.311309	-1.84155	0.307421
	Zircon-57	9	30.6	2.58	11.1	3.11	0.472	9.9	3.4	41.4	17.13	83.2	196.3	44.2	1260	75	554	1.32	9340	6.25	97	382	­	0.253927	0.289143	-2.17235	0.259951
	Zircon-58	2.86	58.7	1.27	9.4	10.09	3.39	56.2	20.45	251	103.2	481	981	205.1	680	9.9	4020	4.26	8810	2.24	529	448	­	1.1808	-0.340391	-2.36226	0.435044
	Zircon-59	0.211	22.1	0.394	6.08	8.59	2.93	37.7	11.23	124.8	45.1	198	406	82.8	380	9.6	1391	1.55	8100	6.475	373	504	­	0.740079	0.093905	-2.41819	0.497563
	Zircon-60	0.086	35.3	0.672	10.17	14.25	0.93	51.4	14.85	157.2	54.2	222.1	369	68.4	40	23.4	1604	1.48	10480	5.65	369	206	­	1.79126	-0.253159	-2.39676	0.105013
	Zircon-61	0.15	10.58	0.069	1.02	2.06	0.505	11.25	3.97	48.6	19.37	91.7	199.1	43.1	300	7.4	610	1.21	9880	3.675	89	232	­	0.383621	0.066417	-2.21629	0.320574
	Zircon-62	0.025	11.59	0.048	0.64	1.56	0.439	9.37	3.31	39.6	15.7	75.3	171.5	37.7	-170	3.8	502	1.04	11160	3.6425	112	237	­	0.472574	0.140484	-2.21723	0.350897
	Zircon-63	0.0063	3.66	0.203	3.67	8.84	0.68	48.3	16	183.1	68	289	515	103	-40	4.9	1878	2.43	8970	4.235	154	265	­	0.581132	-0.288561	-2.3262	0.100567
	Zircon-64	0.076	5.27	0.341	4.71	9.14	2.68	39.7	10.82	109.5	35.9	141.8	257	53.8	370	4	1101	1.29	9170	3.1125	108	227	­	0.475771	-0.053907	-2.29934	0.429946
	Zircon-65	5.8	90	2.56	12.3	7.1	1.29	25.3	8.9	103.1	40.4	193	420	85.4	600	32.5	1262	2.36	10840	4.85	296	487	­	0.607803	0.06428	-2.25034	0.294136
	Zircon-66	0.039	0.117	0.046	1.44	8.37	0.214	34.1	7.47	40.2	7.04	18.9	20.1	3.15	470	210	178.4	0.106	0	0.03775	0	0	­			-2.27789	0.03871
	Zircon-67	73.9	202	19.42	80.9	17.8	2.12	26.7	7.66	91	35.9	178	402	85	1990	2	1157	3.91	10040	11.625	368	435	­	0.845977	0.034263	-2.01205	0.297179
	Zircon-68	0.052	47.6	0.232	5.62	15.34	2.81	95.6	29.6	330	116.5	472	731	137.7	670	5.3	4180	11.09	7550	3.2125	675	689	­	0.979681	-0.025698	-1.81899	0.22424
	Zircon-69	0.102	53.5	0.169	2.15	5	0.85	28	9.44	114.6	45.1	208.8	406	80.7	510	21	1308	6.43	9370	74.725	246	301	­	0.817276	-0.12996	-1.80032	0.219534
	Zircon-70	15.9	139.3	5.03	27.6	19.1	2.11	89.3	31.7	402	158.9	735	1407	269	1470	10.7	6520	17.19	11010	6.7	2143	2640	­	0.811742	0.27331	-1.91302	0.15613
	Zircon-71	10.97	39.2	1.3	6.46	4.3	1.58	19.9	5.89	66	24.3	112	247	55.1	2850	1.4	776	2	11570	7.825	226	659	­	0.342944	0.426188	-2.09167	0.521968
	Zircon-72	0	7.06	0.057	1.71	5.16	0.918	29.4	10.17	116.7	44.1	194.9	345	68.3	-60	3.6	1299	2.31	9520	0.7475	61	143	­	0.426573	-0.382483	-2.17421	0.227767
	Zircon-73	0.33	10.11	0.232	2.61	4.8	1.94	25.3	8.18	96.9	37.7	169.1	315	66.2	310	3.3	1136	1.9	7800	0.83	97	159	­	0.610063	-0.296913	-2.21956	0.537983
	Zircon-74	275	723	100	500	114	7.14	139	27.2	243	80.3	331	582	117.1	8600	2.7	2350	6.32	11090	1.9725	316	332	­	0.951807	-0.243785	-1.96421	0.173335
	Zircon-75	1.27	28.7	0.4	5.1	5.33	1.4	27	9.22	116.1	44.2	212	438	89.7	670	6.7	1388	1.4	11210	1.2	174	243	­	0.716049	-0.255868	-2.49535	0.35664
	Zircon-76	48.1	169	17.6	92.6	34.1	2.6	113.5	32.7	379	141.4	591	1006	193	1950	0	5450	10.03	10800	3.525	685	674	­	1.01632	-0.173938	-2.0013	0.127716
	Zircon-77	0.039	19.8	0.069	1.14	2.68	0.91	13.5	4.76	56.7	23	115.2	266	59.6	60	8.1	758	2.9	10390	1.5425	112	131	­	0.854962	-0.30761	-1.96248	0.462333
	Zircon-78	0.117	24.6	0.288	4.69	8.03	2.06	39	11.71	129.7	48.4	221	448	92.3	360	16.4	1509	1.48	11720	6.8	389	528	­	0.736742	0.071356	-2.48102	0.355733
	Zircon-79	0.423	19.9	0.213	3.98	6.15	2.38	34.6	9.55	95.2	30.7	127.5	233	49.4	150	4	1007	1.62	11210	6.95	241	492	­	0.489837	0.324609	-2.15784	0.498596
	Zircon-80	5.5	24.6	1.75	9.3	4.65	0.59	19.4	7.54	94.5	39.6	200	430	91.6	670	2.7	1268	2.49	9740	1.7725	238	381	­	0.624672	-0.052543	-2.23727	0.189833
	Zircon-81	0.068	6.46	0.08	1.58	2.94	1.03	18.5	6.19	76.2	29.5	136	286	61.8	340	5.7	909	0.76	9520	2.68	50	122	­	0.409836	-0.370006	-2.57555	0.426801
	Zircon-82	0.02	23.15	0.105	1.81	2.8	0.958	15.34	5.11	64.8	26.7	133.1	324	73.5	-40	1.9	872	3.52	11010	6.875	430	641	­	0.670827	0.296313	-1.964	0.446705
	Sample: Yaq-26-1 (EL Salto Formation sandstone)
	Zircon-01	0.0009	10	0.115	2.17	4.86	1.05	25.2	8.6	98	34.2	156	275	59	106	6.2	1050	1.24	11700	3.4	104	222	139	0.468468	-0.09298	-2.34591	0.289947
	Zircon-02	1.01	11.3	0.47	2.58	2.74	0.75	16.1	5.2	60	24.5	111	226	48	145	7.7	720	1.33	12500	2.7	72	187	154	0.385027	-0.082267	-2.23026	0.345081
	Zircon-03	0.0098	17.7	0.192	3.9	7.7	1.84	42	14.1	162	64.6	283	605	126	108	5.4	1940	2.03	11400	3.25	181	317	209	0.570978	-0.280696	-2.47426	0.312677
	Zircon-04	0.74	19.2	0.83	4.77	4.4	2.92	14.5	4.77	55	18.9	82	175	36.5	91	5.4	590	2.03	9300	2.7	227	318	92	0.713836	0.259389	-1.93554	1.11717
	Zircon-05	4.54	13.3	0.785	3.5	1.4	0.439	6.15	2.28	27.3	11.2	56.7	143	33.4	131	1.88	366	0.8	5560	2.5675	95.6	158	63	0.605063	0.043321	-2.25225	0.457204
	Zircon-06	0	17.06	0.0495	1.14	2.52	2.41	19.6	6.77	85.3	33.8	151.6	267	54.6	43	9.1	975	0.99	2630	0.34	79.9	63	99.8	1.26825	-0.627171	-2.43088	1.04794
	Zircon-07	0.0007	10.17	0.045	1.11	3.03	1.13	17.4	6.52	83.9	34.8	170	392	85.2	91	2.34	1099	1.102	3850	2.7875	140.7	174	80.1	0.808621	-0.352737	-2.5511	0.475587
	Zircon-08	0.0136	21.7	0.097	1.51	2.77	0.95	15.3	5.36	66.4	27	126	261	53.6	37	5.25	804	1.91	2620	1.925	120.3	82.5	54.7	1.45818	-0.500187	-2.13561	0.445949
	Zircon-09	0.0031	44.8	0.111	2.01	3.76	1.08	20.6	6.76	82	30.3	131.5	240	47.8	52	5	866	2.94	2840	3.875	422	167	50.9	2.52695	-0.157495	-1.91186	0.375011
	Zircon-10	0.63	40	0.25	2.63	5.8	0.59	29.8	10.5	130	52	231	440	89	94	5.3	1490	3.19	3740	2.05	440	420	59	1.04762	-0.020203	-2.13966	0.137144
	Zircon-11	0.0023	29.8	0.053	1.07	2.41	1.09	18.3	6.9	94	40.5	197	440	94	32	4.6	1230	2.53	6800	1.9	366	362	96	1.01105	-0.084744	-2.24033	0.50158
	Zircon-12	0.068	13.2	0.0227	0.311	0.97	0.052	8	3.41	45.3	19.5	96	222	44.7	103	2.7	590	3.76	8600	0.805	69	176	54	0.392045	-0.10084	-1.77117	0.057045
	Zircon-13	0.0007	6.52	0.074	1.67	3.46	0.514	23.2	7.7	89	33.2	143	256	49.5	151	12	990	0.74	8000	1.6375	75	98	87	0.765306	-0.417014	-2.53901	0.175319
	Zircon-14	0.0008	9.1	0.018	0.68	1.68	0.221	12.2	4.77	62.7	24.8	117	235	48	134	9.5	768	1.33	9800	2.25	79	139	102	0.568345	-0.228053	-2.24722	0.149178
	Zircon-15	0.001	10.3	0.096	1.9	3.45	1.05	14.8	5.14	58.4	24.1	113	246	54	117	4.1	745	1.56	6910	2.9	104	230	no value	0.452174	-0.029207	-2.19781	0.449052
	Zircon-16	0	9.2	0.163	3.39	6.52	0.456	36.8	11.1	118	40.7	167	258	47.9	23	12	1180	0.9	8300	2.75	110	171	92	0.643275	-0.178624	-2.45738	0.089963
	Zircon-17	0.0018	9.4	0.075	1.82	4.13	1.23	21.2	6.32	71.8	26.4	113	215	44.1	40	6.6	771	0.74	8360	1.22	49.2	74.3	123	0.66218	-0.46145	-2.46321	0.401707
	Zircon-18	2.1	11	0.47	2.1	1.1	0.368	4.66	1.63	20.2	8.36	39.5	97.5	22.4	330	6	268	0.71	9400	1.3175	33.5	83.6	85.7	0.400718	-0.066798	-2.13775	0.496714
	Zircon-19	0.014	6.4	0.287	4.98	8.3	2.16	41.3	12.1	135	48.1	209	405	84	70	4.5	1410	1.34	8280	5.3	155	344	130	0.450581	-0.070897	-2.48035	0.356523
	Zircon-20	0.84	9.7	0.41	3.36	4.66	0.74	25.1	8.64	103	37.9	158	294	58.6	193	4.4	1110	2.17	8860	5.95	121	371	112	0.326146	0.101027	-2.13189	0.209098
	Zircon-21	19.5	57.8	5.42	24.2	6.6	1.15	13.6	3.72	44	17	78	193	44.2	990	62.5	551	2.95	8730	6.7	201	408	88.2	0.492647	0.325103	-1.81574	0.37094
	Zircon-22	0	18.8	0.051	1.02	2.02	0.83	13.37	5.21	67.3	28.8	144.2	355	81.1	78	6.3	936	2.14	10050	2.155	186	386	144.8	0.481865	0.036359	-2.21982	0.488072
	Zircon-23	0	30.4	0.109	1.44	4.5	1.74	30.7	11.17	141.3	60.3	294	631	139	320	6.9	1820	2.29	8410	1.09	155	184	206	0.842391	-0.535212	-2.44019	0.452399
	Zircon-24	0.0057	15.2	0.134	2.27	4.44	0.46	21.1	6.62	75.8	25.2	107	191	34.8	50	19.5	756	1.26	10740	2.25	187	194	93	0.963918	0.006768	-2.18066	0.145235
	Zircon-25	0	13	0.1	1.66	2.84	1.13	14.4	5.13	60.7	23.3	107	225	47.6	30	11	717	1.2	9310	1.505	75	132	101.5	0.568182	-0.231609	-2.273	0.53999
	Zircon-26	0.0106	10.02	0.048	1.19	2.5	0.752	12.88	4.27	51.5	20.7	100	240	54.9	-10	5.7	673	0.966	10760	4.3825	178.7	318	106.9	0.56195	0.122216	-2.39523	0.404984
	Zircon-27	0	9.13	0.033	0.51	1.67	0.245	11.42	4.28	52.4	21.59	99.4	210	43.5	250	7.6	663	1.23	11540	1.9225	58.5	125.3	104.2	0.466879	-0.224268	-2.23231	0.171444
	Zircon-28	0	19.6	0.025	0.78	2.27	0.22	13.73	5.54	70.2	30.5	150.8	340	72.2	130	3.13	954	2.76	15120	9.3	247	612	95.4	0.403595	0.255273	-2.09057	0.120426
	Zircon-29	0	9.66	0.043	0.96	2.17	0.751	13	5.08	61.4	25.2	119	272	61.2	330	3.7	773	1.5	8300	3.2075	97	247	135	0.392713	-0.041872	-2.25848	0.432102
	Zircon-30	0.54	43.6	0.6	6.86	9.6	1.51	49.7	17.2	200	78.8	346	672	135.9	560	6.9	2290	3.31	10140	15	624	545	138.2	1.14495	-0.090973	-2.30754	0.211257
	Zircon-31	5.1	28.1	1.19	6.2	4.2	1.22	18.5	5.76	67.3	27.4	133	316	74.1	920	4.1	874	1.66	9910	7.175	316	509	135.7	0.620825	0.207031	-2.27958	0.422958
	Zircon-32	0.033	4.81	0.151	2.53	6.01	0.47	28.2	8.76	94.6	33.8	144	248	49.8	500	1.65	959	1.34	10000	4.125	97.8	261	130.7	0.374713	0.022189	-2.26735	0.110327
	Zircon-33	0	7.95	0.09	1.22	2.55	1.19	14.4	4.37	51.1	20.1	92.5	218	53.1	40	2.9	629	0.86	10080	2.4675	71.8	147.6	176.5	0.48645	-0.16937	-2.40396	0.600127
	Zircon-34	0.14	8.79	0.181	2.91	6.16	1.035	32.8	11.1	129.3	49.3	217	387	77.6	230	11.1	1486	0.87	9420	3.105	140.5	187.9	110.8	0.747738	-0.313784	-2.64819	0.222516
	Zircon-35	1.01	5.05	0.373	3.47	7.36	1.51	39.9	12.63	144.4	52.8	226	423	88	80	33.7	1551	2.5	7420	1.6175	108	161.1	268	0.670391	-0.419245	-2.2284	0.269277
	Zircon-36	0	9.42	0.181	3.22	6.2	1.57	30.1	10.47	122.3	47.3	213	433	90.7	190	5.3	1415	1.08	9110	3.235	172.7	274	107.8	0.630292	-0.198737	-2.60306	0.351211
	Zircon-37	0	15.7	0.042	1.08	2.52	1.03	17.4	7.24	91.5	39.3	194	441	no value	610	5.3	1218	1.71	10640	0.935	83.5	168	141.6	0.497024	-0.419129	-2.41144	0.475346
	Zircon-38	0	50.3	0.079	1.47	4.5	1.77	31.1	11.65	147.5	61.4	293	639	134.6	320	6.2	1872	4.92	11290	2.205	312	413	147.6	0.755448	-0.189551	-2.11354	0.45723
	Zircon-39	0.62	45.5	0.185	1.37	3.36	1.24	20.6	6.6	73.9	27.4	122.9	252	54	50	5200	867	13.8	10470	6.1	442	479	106.6	0.922756	0.278935	-1.26152	0.455476
	Zircon-40	0.0031	10.77	0.089	2.34	3.65	0.89	18.6	6.01	68.1	25.5	116	236	48.4	170	5.6	812	0.88	10870	5.1	206	371	91.6	0.555256	0.196462	-2.42843	0.330092
	Zircon-41	0.88	27.4	0.39	1.76	2.5	0.464	13.8	4.69	62.2	25.2	121.6	267	58.4	500	8.6	794	2.45	10910	9.1	260	317	122.2	0.820189	0.074548	-2.03735	0.24141
	Zircon-42	62	127	12	47	7.8	1.25	12.7	3.68	43.4	18.07	89.2	226	54.5	7300	4.2	582	1.57	10920	3.975	165.8	298	136.7	0.556376	0.120108	-2.15821	0.383803
	Zircon-43	0	14.55	0.062	1.15	2.34	0.635	12.7	4.51	55.6	23	109.5	260	60	630	6.1	716	1.7	10620	6.05	222	401	134.2	0.553616	0.188171	-2.18452	0.355968
	Zircon-44	0.138	18.65	0.046	0.79	2.02	0.412	12.23	5.49	76.2	34.1	185	505	118.1	370	6.4	1128	2.82	10940	1.9675	191.1	364	102.3	0.525	-0.14219	-2.25304	0.253312
	Zircon-45	0.033	16.12	0.05	0.8	1.77	0.574	10.54	3.4	45	18.41	93.2	240	55.5	210	2.02	610	1.81	11720	5.9	208	382	94.6	0.544503	0.201852	-2.12253	0.406118
	Zircon-46	0	1.01	0	-1e-06	0.101	0.027	0.87	0.412	6.22	3.17	19.74	69.6	19.84	30	1.82	111.7	0.642	11170	6.975	18.22	389	71.3	0.046838	0.74734	-2.03507	0.27835
	Zircon-47	0	49.6	0.025	0.88	2.02	0.87	14.2	5.11	64.8	27.1	132	322	75.3	510	2.5	900	3.51	10600	9	565	945	155.1	0.597884	0.467576	-1.96255	0.496417
	Zircon-48	0.039	21.7	0.052	0.83	2.41	0.63	15.8	5.85	72.6	29.4	141	307	68.6	270	3.4	933	1.96	11120	1.335	145	248	115.1	0.584677	-0.092687	-2.19488	0.311997
	Zircon-49	0	14.6	0.058	1.3	2.81	0.96	16	5.6	68	27.2	126	281	64.1	410	3.3	860	2.06	10510	5.3	205	325	148.6	0.630769	0.063177	-2.13484	0.437528
	Zircon-50	0.132	11.17	0.092	1.04	2.01	0.872	9.94	3.48	42.8	17.7	88	220	52.9	580	5.8	570	1.06	9610	2.6275	103.6	193.6	130.2	0.535124	-0.055517	-2.31712	0.596174
	Zircon-51	0.018	11.49	0.014	0.7	1.21	0.485	7.27	2.59	33.4	14.16	73.1	198	48.3	-30	8.8	474	1.48	11170	2.9675	103.1	212.4	134.9	0.485405	0.030489	-2.1264	0.499723
	Zircon-52	13.9	35	2.7	9.5	2.45	0.56	7.9	2.63	31.8	13.42	64.9	159	37.4	2450	6.2	427	1.03	11600	3.5	99.1	247	90.7	0.401215	0.1913	-2.18856	0.38899
	Zircon-53	0	7.2	0.068	1.46	2.35	0.56	12.3	4.13	47	18.3	80	160	35.8	110	3.9	533	0.67	12830	4.35	68	270	80.5	0.251852	0.227244	-2.37805	0.318309
	Zircon-54	1.64	16.3	0.727	5.99	7.14	1.43	29.6	8.57	102	36.1	160	335	75.7	480	137	1090	4.38	7900	7	202	533	103.5	0.378987	0.201682	-1.88357	0.3006
	Zircon-55	0.56	49.6	0.304	2.6	3.71	1.1	25.7	10.14	128.7	56.4	278	624	134.7	440	4	1745	4.89	11460	2.6575	394	539	122.6	0.730983	-0.063596	-2.10588	0.34426
	Zircon-56	0	13.64	0.075	1.32	3.16	1.07	18.3	6.88	87.9	36.6	180.7	427	98.3	560	6.9	1156	1.32	9570	0.9125	101.6	167.6	121.8	0.606205	-0.406154	-2.50985	0.429994
	Zircon-57	0	41.6	0.058	1.55	2.92	1.03	20.6	8.25	103.2	44.3	214	498	109.1	390	7.5	1378	3.88	11180	2.905	513	592	117.2	0.866554	0.075092	-2.1084	0.405844
	Zircon-58	0	6.46	0.0155	0.41	1.24	0.414	8.68	3.43	47.8	21.05	109.2	286	69.7	20	4.6	697	1.42	9740	1.96	49.5	115.6	118.1	0.428201	-0.393408	-2.30408	0.385636
	Zircon-59	0	6.78	0.015	0.266	0.95	0.222	5.88	2.53	35.9	14.8	76.8	201	48.7	200	4	483	1.19	13270	2.645	56.9	158.6	110.3	0.358764	-0.102893	-2.22765	0.287045
	Zircon-60	0	19.1	0.018	0.96	2.36	0.87	10	3.39	40.1	15.6	74.6	165	38.6	230	5.7	524	1.81	10250	2.6775	101.4	213	102	0.476056	0.110896	-1.95981	0.547281
	Zircon-61	0.21	16.9	0.38	4.81	6.95	2.87	28.4	7.87	81.4	28.3	121	240.3	52.5	430	10.8	888	1.39	8360	3.115	165.8	234	116.7	0.708547	-0.011538	-2.23774	0.624278
	Zircon-62	0.31	144	0.59	10.1	17.9	3.92	92	30.2	350	132	563	1020	202	890	5.5	3870	8.8	9940	2.23	740	388	127.1	1.90722	-0.419768	-2.06412	0.295198
	Zircon-63	0.12	20	0.34	3.79	5.06	0.853	22.6	6.7	72.7	25.3	103.7	179	34.9	410	21.6	746	1.42	9530	1.655	104.4	124.4	104.7	0.839228	-0.158033	-2.10057	0.243763
	Zircon-64	8.5	25	1.9	8.2	2.8	0.5	7.2	2.3	27.1	11.25	58	151.1	36.9	2000	3.8	383	0.82	11540	4.815	95	333	110.5	0.285285	0.34318	-2.26545	0.340308
	Zircon-65	0.08	37.8	0.079	1.1	1.97	0.75	12.7	4.78	62.8	29	149.6	414	99	610	2.9	953	3.62	12840	14.175	673	1270	119.4	0.529921	0.486803	-2.05829	0.45822
	Zircon-66	0	9.22	0.106	2.4	4.64	1.09	21.8	7.58	87.8	33.2	148.5	279	57.8	520	9.2	1002	0.8	11160	3.825	137.2	247	116.3	0.555466	-0.052907	-2.54251	0.331197
	Zircon-67	0.74	13.7	0.297	1.36	1.29	0.52	5.52	1.93	23.5	9.47	48.9	128.1	30.2	150	7.2	328	0.96	12670	4.79	102.4	335	87.8	0.305672	0.417496	-2.12528	0.595506
	Zircon-68	0	5.11	0.0147	0.4	0.92	0.323	5.67	1.97	25.3	10.88	54.7	134.6	31.7	500	5.5	352	0.821	10410	1.995	50.4	129.3	109.9	0.389791	-0.017447	-2.2147	0.43218
	Zircon-69	112	247	26.3	108	16.3	2.95	20	4.33	42.8	17	83.5	206	50.3	18400	5.7	546	0.98	11020	3.01	86.8	189	144.8	0.459259	-0.037405	-2.32264	0.499299
	Zircon-70	0	24.3	0.019	1.09	3.59	1.46	22.9	8.7	113.1	47.5	223.2	483	105.8	400	2.1	1452	2.63	10190	5.05	192.5	367	250	0.524523	-0.119281	-2.26399	0.49208
	Zircon-71	0.062	28.5	0.166	2.29	5.1	1	28.8	10.53	131.1	52.2	241.5	463	95.2	570	14.8	1601	2.57	9130	5.8	369	375	153.2	0.984	-0.09155	-2.25565	0.252154
	Zircon-72	0	2.06	0.05	1.37	3.72	0.241	21.5	7.41	88	34.1	149.5	283	59.5	390	9.2	989	1.61	9870	3.41	67.6	230.5	189.8	0.293275	-0.089116	-2.24496	0.082352
	Zircon-73	0	7.46	0.031	0.33	0.87	0.303	5.29	1.89	24.7	10.67	55.9	143.2	35.4	240	1.38	361	0.96	11010	4.845	97.9	308	95.7	0.317857	0.332608	-2.17367	0.431621
	Zircon-74	0	12.43	0.015	0.3	0.63	0.245	5.25	1.75	22.7	9.73	52.4	139.3	34.9	150	0.91	334	1.17	11700	6.85	147.3	444	80.6	0.331757	0.503432	-2.07577	0.411684
	Zircon-75	0.013	21.9	0.127	2.5	5.13	1.65	29.8	9.1	106	41.6	186	398	92.7	140	3.2	1300	2.44	11880	13.05	439	870	119.8	0.504598	0.339636	-2.21249	0.407816
	Zircon-76	0.094	11.9	0.141	0.93	1.38	0.76	5.9	2.48	29.5	11.3	59.1	148	35.8	220	9	395	1.14	8750	5.075	237	363	94.2	0.652893	0.389645	-2.11336	0.813946
	Zircon-77	0.033	12.8	0.117	2.42	4.79	1.41	27.2	9.42	115.9	45.8	216	453	96.5	710	4.9	1397	2.11	8360	5.65	217	452	190	0.480088	-0.00096	-2.33182	0.377498
	Zircon-78	0	15.69	0.031	0.75	1.83	0.28	11.65	4.61	54.7	21.53	95	178.5	37	740	9	679	1.78	10290	2.8425	168.3	233.5	98.3	0.720771	0.116649	-2.00122	0.185318
	Zircon-79	0.056	17.02	0.076	1.33	2.47	0.712	13.83	4.84	63.1	24.9	114	253.9	56.9	310	8.9	777	1.66	9870	10.9	704	807	123.3	0.872367	0.502211	-2.18456	0.372278
	Zircon-80	0	28.5	0.057	1.63	3.98	1.26	24	9	107	43.5	203	438	92.7	-30	1.4	1360	2.6	12190	6.325	354	551	94.1	0.642468	0.099677	-2.2265	0.393977
	Zircon-81	4.2	33.5	1.39	7.8	7.1	1.15	35.4	11.5	134	49.1	217	410	81.4	830	15.1	1480	1.94	10170	5.5	410	373	126.7	1.0992	-0.041075	-2.32498	0.221674
	Zircon-82	0	6.99	0.051	1.06	2.48	1.04	12.02	4.07	47.1	19	91.3	218	52.5	260	2.09	597	0.746	9880	2.165	51.4	129.8	202.9	0.395994	-0.225182	-2.46572	0.582107
	Zircon-83	0.065	24.2	0.435	7.9	12	3.75	53.7	14.1	145	46.3	181	310	64.7	480	2.6	1410	3.09	11020	5.425	274	400	134.9	0.685	0.110698	-2.0014	0.451441
	Zircon-84	0.015	6.46	0.183	3.37	6.62	1.49	38	12.09	134.1	48.2	201.7	358	71.3	50	10.3	1395	0.776	9130	2.735	108.9	173.1	132.4	0.629116	-0.315586	-2.66402	0.287087
	Zircon-85	0.114	11.58	0.147	1.64	2.46	0.87	12	4.09	45.3	18.5	86.2	207.6	48.7	220	4.3	594	0.815	10150	3.7375	157	255	114.8	0.615686	0.089313	-2.40607	0.489338
	Zircon-86	0.0023	42	0.115	1.9	4.46	1.32	30.8	11.72	143.2	58.2	277	565	122.9	270	2.8	1755	4.08	12650	2.53	290	470	138.2	0.617021	-0.079951	-2.14139	0.344174
	Zircon-87	18.6	56	4	17.7	8.1	1.83	27.8	8.7	95.6	36	171.7	383	88.4	2700	3.2	1147	1.68	11830	8.35	347	572	107.4	0.606643	0.174197	-2.35789	0.372678
	Zircon-88	0.041	13.19	0.169	3.19	4.92	1.47	21.9	6.93	78.5	31.3	146.9	335	74.6	80	4.8	1002	0.96	9840	4.75	226.7	318	102.3	0.712893	-0.022618	-2.54277	0.432773
	Zircon-89	9.7	41.2	2.46	12.5	6.54	2.02	24.9	7.7	84.2	31.3	139.5	304	68.1	1540	4.5	1009	1.73	9880	6.725	336	487	106.7	0.689938	0.204655	-2.24483	0.483738
	Zircon-90	0.035	27.8	0.13	1.82	3.12	1.09	15.8	4.74	54.3	20.4	95.8	209	47.3	-250	3.8	664	4.45	8900	7.525	443	486	100.8	0.911523	0.36649	-1.67179	0.474426
	Zircon-91	1.9	15	0.62	3.18	3.39	0.528	14.8	4.66	56	21.3	95.5	188.9	41.3	980	4.6	651	0.78	10190	3.35	114.4	218	103.3	0.524771	0.062225	-2.38414	0.227798
	Zircon-92	0.233	20.96	0.07	0.61	1.12	0.646	6.8	2.36	34.4	16.45	98.3	313	87.8	270	5.9	603	1.66	8680	11.75	166.9	331	91.6	0.50423	0.024284	-2.27544	0.715347
	Zircon-93	0.06	20.2	0.443	8.1	14.75	6.85	61	17.27	177.2	62.2	266	521	110.9	260	9.3	1871	1.76	7900	2.6875	302	230.1	122.5	1.31247	-0.354921	-2.47133	0.697874
	Zircon-94	2.33	33.8	0.8	5.2	3.61	0.279	20.7	7.48	101.5	40.1	189.1	390	79.2	480	5.6	1200	5.41	11890	1.7325	167.5	335	85.5	0.5	-0.06602	-1.85787	0.098631
	Zircon-95	0.043	16.92	0.058	1.29	2.55	0.542	12.9	4.14	49.2	19.4	96.5	215	49.1	350	3.2	639	2.16	10390	3.6975	174.3	307	85.4	0.567752	0.1547	-1.99798	0.28879
	Zircon-96	0.0071	10.53	0.023	0.68	2.27	0.219	16.9	6.99	96.9	40.6	196.2	418	89.7	430	1.68	1256	1.83	11040	6.575	138.8	332	129	0.418072	-0.100038	-2.35873	0.108053
	Zircon-97	0	13.17	0.163	3.45	6.88	1.66	32.1	9.71	104.3	36.9	156.4	264	54.3	220	11.8	1099	0.83	11150	1.5575	116.2	149.9	136.5	0.775183	-0.245802	-2.50253	0.341357
	Zircon-98	0	19.1	0.054	1.03	2.55	1.54	14.9	4.89	56.5	21.15	92.4	178.3	37.9	290	20.1	601	0.85	8020	0.2575	33.8	44.6	121.1	0.757848	-0.601816	-2.32173	0.763493
	Zircon-99	54	143	13.7	59	16.5	3.75	50.1	13.31	140.8	49.3	207.1	366	73.4	6100	10.2	1470	1.19	9680	3.4275	188	204.1	102.1	0.921117	-0.253638	-2.48793	0.398582
	Zircon-100	1.08	12.7	0.49	1.96	1.36	0.69	8.9	3.11	37.3	15.1	73.5	180	44.2	870	5.3	495	1.11	9460	3.025	87.4	196	107.6	0.445918	0.036984	-2.20995	0.606083
	Zircon-101	0	21.25	0.031	0.89	1.74	0.409	9.9	3.98	48.5	19.5	95.2	209	44	80	2.4	623	2.48	10960	62.05	71.5	197.2	76	0.362576	-0.025239	-1.92569	0.301147
	Zircon-102	0	8.54	0.316	6.94	15.5	1.01	73.8	22.5	250	90.6	368	599	119	460	3.9	2420	2.13	8510	6.125	206.9	366	179.7	0.565301	-0.213946	-2.44905	0.091259
	Zircon-103	1.01	15.28	0.331	2.4	2.97	0.77	15.4	5.71	69	27.8	126.9	287	65.8	370	27.5	860	3.18	9600	8.375	258	597	132.4	0.432161	0.318092	-1.95545	0.347936
	Zircon-104	0.012	25.1	0.117	2.56	6.22	0.355	36.3	13.07	160.5	62.7	278.8	512	102.4	440	1.99	1814	5.58	9210	11.65	296	529	129.4	0.559546	0.014186	-1.96264	0.072198
	Zircon-105	0.051	6.51	0.101	1.53	3.03	0.73	17.9	5.56	60.5	21.89	95.1	190.7	41.9	410	2.9	690	0.97	10650	5.575	111.6	370	111.6	0.301622	0.287851	-2.29358	0.302916
	Zircon-106	0	8.16	0.179	4.02	7.05	1.067	32.2	10.62	117.4	43.4	182	316	63.9	310	3.9	1226	2.18	8270	0.97	88.5	180.5	121.1	0.490305	-0.24321	-2.16123	0.216416
	Zircon-107	0.0023	5.43	0.268	5.18	10.1	0.88	59	18.7	215	77.9	333	559	112.8	-30	3.6	2160	1.62	7500	5.3	153	298	223.2	0.513423	-0.273196	-2.5379	0.110165
	Zircon-108	11	29	2.6	12.3	2.95	0.73	9.17	2.92	33.4	13.2	62.5	148.4	35.4	1380	2.9	414	0.668	9890	3.19	71	196	106.3	0.362245	0.120822	-2.34666	0.428918
	Zircon-109	0	23.5	0.071	1.66	5.14	3.06	38.3	13.7	165.1	63.3	278	578	122.8	200	6.6	1899	6.14	10370	7.55	173	632	161.7	0.273734	0.038789	-1.97376	0.666481
	Zircon-110	0.023	9.1	0.082	2.13	4.96	0.83	26.6	7.97	91	34	142	260	54.8	320	4.4	1000	0.97	10160	4.3	136	351	162	0.387464	0.130334	-2.4282	0.220823
	Sample: Yaq-26-7 (EL Salto Formation sandstone)
	Zircon-01	1.1	21.1	0.398	2.82	3.25	1.17	18.8	6.65	81.2	33.2	165	392	90.2	1430	2.34	1062	1.14	9480	1.0825	161.4	234	128.9	0.689744	-0.22407	-2.53638	0.457417
	Zircon-02	0	26.3	0.042	0.81	2.81	0.99	17.6	6.69	87.4	37.3	189	425	97.9	610	5.2	1181	2.97	9630	1.3325	166	272	157.9	0.610294	-0.19382	-2.15563	0.430203
	Zircon-03	0	6.49	0.06	1.25	3.57	0.609	25.7	9.3	119.4	48.2	222.4	433	90.6	930	6	1437	1.076	8370	2.06	58.3	114.8	144.3	0.50784	-0.576546	-2.60468	0.194296
	Zircon-04	3.16	19.4	1.13	6.4	3.75	0.416	20.1	8.09	111.6	49.9	256.3	579	128.8	840	3.4	1565	2.89	10120	6.36	125.7	360	102.6	0.349167	-0.206376	-2.30178	0.146429
	Zircon-05	0.46	42.2	0.169	1.97	3.65	1.47	25.4	9.33	121.3	52.1	254.6	598	133.6	790	12.9	1645	3.64	8500	1.77	320	313	173.6	1.02236	-0.281157	-2.2156	0.466554
	Zircon-06	0.0022	9.99	0.086	1.38	2.24	0.666	10.4	3.5	40.4	16.2	79.2	184	42.9	390	4.9	513	0.719	10450	3.625	142	229	87.1	0.620087	0.095018	-2.40809	0.421678
	Zircon-07	0	36.5	0.036	0.69	2.43	0.85	19.2	7.99	109.6	48.9	252	609	137	410	3.5	1557	5.16	11290	1.985	187	396	123.3	0.472222	-0.186922	-2.07197	0.380288
	Zircon-08	0	6.55	0.121	2.44	6.77	2.31	44.2	16.2	199	78.6	366	774	170	1120	6.1	2440	1.54	7960	3.725	86.6	227	234.3	0.381498	-0.532715	-2.70122	0.408088
	Zircon-09	6.4	27.9	1.5	6.1	2.73	0.64	9.82	3.53	41.4	17.01	87.2	227	55.7	900	2.8	574	2.26	9990	5.125	234	444	95.9	0.527027	0.291357	-2.00192	0.377738
	Zircon-10	0	13.1	0.04	1.16	1.98	0.41	11.5	3.16	36.4	12.3	50.4	90.7	18.9	190	15.2	368	0.94	11460	0.5425	39.6	56.8	108	0.697183	-0.203259	-1.98448	0.262573
	Zircon-11	0.067	21.07	0.445	8.22	16.8	4.56	77.8	24.5	252	86.4	348	611	123.6	720	21.7	2597	4.68	9070	9.725	508	754	243.8	0.67374	0.09133	-2.11579	0.38545
	Zircon-12	0.065	9.35	0.072	1.24	2.04	0.389	8.94	3.27	38.3	16.01	77.9	188	43.3	300	3.1	512	1.23	10830	6.1725	163	430	82	0.37907	0.359311	-2.18425	0.278364
	Zircon-13	0.055	10.74	0.048	0.76	1.22	0.51	6.6	1.96	26	10.6	48.3	114	28.1	-70	4.1	328	0.752	8840	1.9875	89	159	77.9	0.559748	0.144492	-2.18069	0.549245
	Zircon-14	0.26	29.4	0.275	2.94	5.75	0.555	33.1	12.48	155.5	62.2	286.4	579	120.6	440	3.6	1907	3.05	10230	12	356	586	92.5	0.607509	0.005219	-2.27838	0.12294
	Zircon-15	0.048	8.02	0.117	1.78	4.22	0.77	24.7	9.32	118.9	47.8	210	384	78.3	880	6.8	1333	6.41	10990	127.25	120.7	412	66	0.292961	0.030566	-1.77747	0.23048
	Zircon-16	0.0063	12.31	0.124	3.12	4.65	1.38	20.6	6.86	78.7	32.2	157	365	83.4	570	5	1017	1	9350	4.37	221.4	331	120.9	0.668882	-0.042465	-2.56229	0.43089
	Zircon-17	0.035	8.34	0.256	4.89	9.31	0.75	43.5	14.62	173	66.6	290.1	512	100	700	10.8	1988	1.32	9650	4.26	137.2	254.5	101.7	0.539096	-0.303582	-2.5887	0.113891
	Zircon-18	0	153	0.204	3.87	12.1	2.7	74	26.6	301	111.2	481	818	164.1	2140	5	3160	13.48	9060	2.575	904	546	146.1	1.65568	-0.175561	-1.78306	0.275742
	Zircon-19	6.8	83	2.4	16.8	14.2	3.25	58.2	16.44	177.6	64.3	268	468	94.6	1300	17.2	1811	3.16	8370	35.075	108.3	143.6	108.8	0.754178	-0.513091	-2.17056	0.345482
	Zircon-20	0.019	9.47	0.33	4.26	6.98	2.62	27	8.42	91.1	33.6	154	330	75.5	500	7.6	1055	1.12	7920	2.955	157	254	122.8	0.61811	-0.11368	-2.4693	0.583229
	Zircon-21	0.018	11.9	0.134	2.35	4.03	0.96	18.7	6.29	74.5	29.7	142	323	73.1	630	5.9	944	1.08	9960	4.275	181.2	282	91.7	0.642553	-0.058953	-2.47578	0.337944
	Zircon-22	0.382	182.7	0.603	9.57	18.7	4.9	92.1	29.8	334	122	512	905	178.2	1520	10	3580	16.4	9240	17.725	2730	1585	253	1.7224	0.243381	-1.74181	0.360822
	Zircon-23	0	4.27	0.236	4.89	8.47	2.53	45.5	14.13	159	56.6	247.4	465	98.3	540	3.13	1634	0.868	8190	4.115	126.8	258	116.7	0.491473	-0.255833	-2.72893	0.393841
	Zircon-24	0.012	13.01	0.229	4.16	6.81	1.45	35.6	11.88	135.8	49.3	204.8	353	70.7	1180	10.5	1433	1.12	9610	2.775	131.5	203.3	143.3	0.646827	-0.239637	-2.49856	0.284588
	Zircon-25	10.1	38	2.8	11.5	4.38	1.26	15.9	4.93	60.2	23.5	111.1	248	56.2	3000	4.8	738	0.85	9760	3.135	157.1	220	114.4	0.714091	-0.052029	-2.46503	0.461405
	Zircon-26	0.51	12.2	0.4	3.09	2.65	0.8	16.3	7	96	37.2	171	416	89	1330	6.5	1170	1.83	13760	25.25	52.6	708	346	0.074294	0.23094	-2.35664	0.371981
	Zircon-27	0	18.95	0.036	0.88	2.2	0.527	10.49	3.68	42.3	17.05	81	176.2	38.8	670	8.7	534	1.34	9280	2.775	156	210	107.7	0.742857	0.076213	-2.1189	0.335242
	Zircon-28	0	0.923	0.027	0.67	1.19	0.416	6.98	2.35	26.6	9.72	45.3	96.8	22.38	820	1.85	326	0.405	8310	0.7575	13.73	52.8	106.5	0.260038	-0.263241	-2.37842	0.441103
	Zircon-29	0	9.27	0.018	0.43	1.31	0.399	7.66	2.79	37.3	15.62	81.2	209.2	51.1	720	3.5	505	1.13	9870	3.46	86.4	212.5	130.2	0.406588	0.006797	-2.26748	0.38492
	Zircon-30	1.26	29.3	0.481	3	1.65	0.99	9.3	3.05	38.4	18	93.2	282	77.6	1560	25.2	594	2.07	7040	17.175	297	512	69.8	0.580078	0.259021	-2.13428	0.772323
	Zircon-31	1.06	25.6	0.18	1.4	1.82	0.802	11.51	4.03	49.3	19.63	96.1	229	56.7	860	3.4	667	2.33	10640	10.825	258	898	117	0.287305	0.593441	-1.99248	0.535486
	Zircon-32	0.081	27.2	0.112	0.93	1.52	0.73	7.7	2.78	33.8	12.1	57.2	137	30.1	1800	3.7	416	2.17	8490	3.8	207	339	84.2	0.610619	0.393479	-1.80026	0.652083
	Zircon-33	0.0028	0.84	0.0147	0.49	1.25	0.193	9.31	3.34	39.5	14.82	68	130.1	28.7	350	11.4	424	0.79	7860	0.9575	16.73	54.6	184.3	0.30641	-0.377085	-2.21665	0.172892
	Zircon-34	0.39	7.26	0.139	0.99	1.31	0.262	10.02	3.54	44.8	18.63	90	184.1	40.6	550	7.9	573	0.83	11640	2.2825	52.5	127.8	114.6	0.410798	-0.158523	-2.34598	0.220993
	Zircon-35	0.062	5.81	0.103	1.81	3.73	0.367	20.7	7.01	80.8	29	128.9	253.9	52.8	850	10.6	882	1.05	11920	8.8	178	569	122.2	0.31283	0.35045	-2.38347	0.127636
	Zircon-36	0.032	24.07	0.127	2.45	3.92	1.39	20.7	6.58	75.2	28.13	130.4	293.2	65	640	3.5	902	1.86	10390	7.025	398	575	90	0.692174	0.292504	-2.19765	0.471557
	Zircon-37	0.112	30.5	0.062	1.21	3.28	0.78	18.1	6.41	75.9	30.3	141.8	299	64.7	850	2.82	949	2.3	9900	3.4475	126.3	237.4	136.4	0.532013	-0.10019	-2.11394	0.309361
	Zircon-38	0.48	14.39	0.232	1.96	2.82	1.56	17.1	6.15	75.5	28	128.4	284	65.9	1010	6	885	1.26	10140	2.9825	107.5	203.9	198.9	0.527219	-0.143901	-2.35295	0.686514
	Zircon-39	0	7.25	0.03	0.39	0.93	0.442	6.04	2.15	26.5	10.93	53.1	130.5	31.3	420	3.6	356	0.9	10450	5.8	131.8	391	96.1	0.337084	0.476566	-2.16137	0.569915
	Zircon-40	1.4	41.3	0.56	3.8	3.74	0.7	21.4	8.27	105.2	43.8	210	437	92.6	2210	6.4	1347	6.06	10040	2.495	312	446	89.6	0.699552	0.008853	-1.85801	0.239113
	Zircon-41	6.7	41.1	1.6	6.9	3.99	1.37	16.1	5.89	68.3	27.5	133.3	322	75	2600	8.7	887	2.06	10320	12.275	554	838	129	0.661098	0.415388	-2.19399	0.522358
	Zircon-42	0.195	10.93	0.038	0.28	0.66	0.134	4.32	1.73	25.1	10.55	57.2	144	33	930	272	366	2.13	13280	7.325	127	488	66.5	0.260246	0.530057	-1.82998	0.242515
	Zircon-43	0	13.35	0.106	1.34	1.8	0.88	13.2	4.17	48.6	19.17	91	219.1	52.5	550	4.2	617	0.86	10710	4.0025	191.9	265.3	96.3	0.723332	0.083095	-2.40614	0.551705
	Zircon-44	0	12.05	0.027	0.52	1.15	0.35	6.67	2.07	27.5	11.73	62.2	161.7	40.1	580	4	385	1.09	10300	4.3975	142.9	287.1	100	0.497736	0.249323	-2.17128	0.386192
	Zircon-45	5.88	27.8	1.62	10.2	6.22	0.88	21.5	7.12	80.5	29.2	125.7	233.4	48.6	2180	14.4	875	1.4	9270	2.0675	144.2	178.1	122.7	0.809657	-0.117437	-2.22197	0.23255
	Zircon-46	0.273	15.64	0.117	1.83	2.6	0.61	12.7	4.27	47.6	17.5	81.2	173.9	37.8	710	8.2	568	1.12	9960	2.0525	125.8	188.2	90.5	0.668438	0.03432	-2.19108	0.324406
	Zircon-47	0	12	0.094	1.88	3.98	0.506	22.5	8.4	98.4	38	168	302	61.9	1270	4.6	1144	1.038	10500	6.7	225	414	119	0.543478	0.136993	-2.46381	0.163405
	Zircon-48	0.024	16.81	0.174	2.45	4.9	0.656	26.6	8.49	93.6	33.2	136.3	225	43.9	840	14.8	998	1.166	10240	2.3775	184.9	201.6	90.9	0.917163	-0.047692	-2.28548	0.175595
	Zircon-49	0	8.55	0.054	1.02	1.89	0.69	9.9	3.45	40.1	15.9	75.7	178.5	43	1070	3.2	502	0.804	10210	5.39	145	355	102.3	0.408451	0.29859	-2.34638	0.48747
	Zircon-50	0	8.95	0.017	0.95	2.87	0.107	15.72	5.76	67.8	25.28	109.1	194.8	39.1	710	4.4	724	3.56	10410	43.55	72.3	205.9	71.6	0.351141	0.024067	-1.73814	0.048682
	Zircon-51	0	1.406	0.095	2.23	5.89	0.536	25.87	9.25	105.3	37.8	160.5	271.5	55.8	590	5.2	1057	0.524	11680	1.625	48.4	138.3	169.2	0.349964	-0.292948	-2.71444	0.132696
	Zircon-52	0.023	4.12	0.04	0.66	3.29	0.213	25.6	10.13	123.4	45.1	191	345	68.8	930	2.6	1352	3.72	12110	9.55	162	823	184.8	0.196841	0.377581	-1.96728	0.070927
	Zircon-53	0	29.9	0.045	0.89	2.01	0.71	11.25	3.82	44.7	17.92	87.3	201.1	46	530	3.6	588	2.71	10400	5.67	254.8	463	84	0.550324	0.362169	-1.87044	0.45628
	Zircon-54	0	9.92	0.08	1.72	2.63	0.391	14.9	4.77	53.6	20.5	88.2	158.8	32.7	710	17.7	618	0.92	9100	1.1875	88.7	100.9	99.5	0.879088	-0.196959	-2.23706	0.190877
	Zircon-55	0.207	7.43	0.174	2.55	4.92	0.43	31.7	11.32	130.5	49.2	210.1	363	72.1	440	4.5	1440	0.89	10680	5.775	149.8	363	108.3	0.412672	0	-2.61052	0.105221
	Zircon-56	0	12.6	0.065	1.07	2.1	0.683	15.3	5.31	61.2	23.3	109.8	247	57.8	580	4.7	766	1.21	11260	8.325	248	514	152.5	0.48249	0.318266	-2.30991	0.368225
	Zircon-57	0.041	23.2	0.044	0.55	1.03	0.583	9.22	3.54	45.6	19.7	98.1	259	64.7	290	2.2	657	2.23	11060	5.0225	250	556	117.5	0.44964	0.331775	-2.065	0.578139
	Zircon-58	1.9	11.4	0.2	1.45	0.74	0.316	5.19	1.9	21.19	8.75	43.9	113.5	26.88	690	4.6	290.8	0.98	9570	1.95	87.9	161.6	84.6	0.543936	0.153445	-2.06377	0.492759
	Zircon-59	0.06	0.6	0.033	0.09	-2e-06	0.047	0.55	0.43	5.63	3.14	22.4	92.2	29.6	-980	0.7	109.8	0.79	10250	81.25	10.32	610	61.6	0.016918	0.820599	-2.0671
	Zircon-60	0.055	4.92	0.03	0.4	0.77	0.316	5.2	1.71	22.06	8.69	43.3	111.7	26.23	390	37	297.6	0.83	12010	3.88	54	274.1	87.3	0.197008	0.389856	-2.12898	0.4826
	Zircon-61	0.89	14.8	0.22	2.01	2.33	0.69	12.1	4.13	49.7	20.9	no value	233	54.5	260	4.8	666	1.12	10800	2.9525	117.1	210	123.8	0.557619	-0.045137	-2.31814	0.397124
	Zircon-62	8.3	26.6	2.4	9.7	3.37	0.83	13.4	4.19	52.2	21	102.7	250	57.3	3700	3.4	676	0.74	11340	7.825	220	505	96.8	0.435644	0.305351	-2.52871	0.377449
	Zircon-63	0	2.57	0.043	0.98	2.9	0.164	21.2	7.04	86.3	32.8	143.5	263	54.2	520	1.32	932	1.18	11190	3.055	57.6	186	118.1	0.309677	-0.150443	-2.34807	0.063918
	Zircon-64	0.018	5.87	0.023	0.41	0.63	0.41	4.34	1.58	19.3	7.48	37.3	94.4	24.3	160	16.5	252	0.649	10850	3.7875	62.2	264.6	87.7	0.235072	0.447618	-2.16273	0.757733
	Zircon-65	2.05	12.8	1.26	12.1	10.3	0.55	52.8	17	204	77.5	351	661	139.5	2600	6.1	2400	6.6	11360	184.75	170	574	102.1	0.296167	-0.06129	-2.00066	0.072073
	Zircon-66	0.009	22.8	0.056	1.08	2.26	0.74	13.1	4.42	53.5	20.4	97	221	49.2	180	3.6	670	1.45	11590	3.7025	232	326	91.9	0.711656	0.168825	-2.18302	0.415613
	Zircon-67	0.18	20.4	0.256	2.43	4.01	0.49	20.2	7.7	95	39.9	191	418	91.1	810	3.5	1190	5.52	7400	9.925	230	430	98	0.534884	0.012292	-1.87924	0.166378
	Zircon-68	0.023	39.8	0.058	0.95	2.12	0.85	17.8	7.2	96	41.1	196	417	88.2	500	6.2	1238	5.15	11060	0.83	123.1	153.4	92.1	0.802477	-0.434311	-1.90833	0.422852
	Zircon-69	0.62	7.21	0.32	3.44	6.19	0.503	32.9	11.25	131.7	49.5	216	375	77	540	6.6	1450	1.49	10200	7.025	192	491	180	0.391039	0.11705	-2.40084	0.107714
	Zircon-70	0	8.68	0.026	0.38	1.08	0.304	5.72	2.04	25.6	11.32	55.6	139.2	33.9	260	5	351	0.9	10960	2.2825	84.7	194.7	92.5	0.435028	0.145727	-2.1894	0.373776
	Zircon-71	0.0019	6.62	0.075	1.39	2.68	0.73	17.3	5.95	76.2	31.6	153	353	82.6	350	4.1	972	0.72	10230	6.575	136	313	163.8	0.434505	-0.05223	-2.69044	0.327627
	Zircon-72	1.67	39.6	0.426	5.1	6.6	3.28	28.9	9.43	107.9	42.2	195	407	91.7	670	100	1316	2.06	11640	13.4	602	812	125.2	0.741379	0.299962	-2.29573	0.725772
	Zircon-73	0.086	12.15	0.111	1.07	1.91	1.09	9.6	3.12	35.8	14.4	69.9	178.6	45.2	910	1.9	477	0.67	10980	2.7975	63	190.7	139.9	0.330362	0.028469	-2.42581	0.777896
	Zircon-74	4.4	44	1.79	12.1	8.3	1.76	31.2	10.99	133	51.8	243	517	107.5	1950	122	1663	3.12	11820	7.8	347	733	126.1	0.473397	0.151613	-2.21934	0.334229
	Zircon-75	0	11.56	0.054	0.89	1.84	0.661	8.65	3.23	37.7	15.56	77.6	198	49.5	80	4	507	0.9	11380	4.12	156.8	280	101.1	0.56	0.150493	-2.34242	0.506328
	Zircon-76	0.0019	11.66	0.049	0.66	1.08	0.459	7.39	2.7	34.1	14.32	70.5	187.3	45.4	360	7.2	468	1.43	9940	3.6925	110	276.9	112.5	0.397255	0.169785	-2.1172	0.496508
	Zircon-77	0.18	21.4	0.088	1.04	1.62	0.59	11.4	4.35	59.6	26.2	139	360	85.8	780	3	874	1.82	10800	1.265	144.3	241	122.3	0.598755	-0.174285	-2.29623	0.419556
	Zircon-78	0.0024	14.07	0.017	0.56	1.45	0.365	9.17	3.67	47.3	20.3	102.8	267.1	63.6	220	3.1	662	2.96	11860	8.625	203.9	854	97.9	0.238759	0.504784	-1.95538	0.305894
	Zircon-79	0	8.13	0.029	0.58	1.38	0.36	8.46	3.33	43	18.77	98.4	262.9	66.2	340	4.1	607	1.21	10580	3.9575	125.4	306	154.7	0.409804	0.065931	-2.337	0.321977
	Zircon-80	0.016	40.4	0.201	3.48	4.47	1.2	19.7	6.25	76.3	30.5	160	431	108.8	0	2.5	1112	1.96	11040	13.75	831	1150	114.3	0.722609	0.426221	-2.34222	0.390789
	Zircon-81	0.073	22.3	0.124	1.97	3.72	0.505	19.8	6.94	81.1	31.5	144	273	57.7	390	6.1	922	3.08	10620	46.5	161	193	79.9	0.834197	-0.150605	-1.94761	0.179819
	Zircon-82	0.55	10.36	0.334	3.66	6.5	0.616	38	13.33	157.6	60.1	261	455	91	740	2.26	1762	1.5	11680	9.85	239	615	111	0.388618	0.130864	-2.48192	0.119779
	Zircon-83	0	6.68	0.052	1.68	4.52	0.95	27.8	9.9	116.3	44.9	197.4	349	72.1	420	7.1	1271	1.79	8790	70.75	105.8	222.9	141.8	0.474652	-0.194715	-2.28997	0.258988
	Zircon-84	0.018	11.18	0.041	0.55	0.86	0.502	6.8	2.34	28.7	12.1	61.9	154	37.3	90	3.7	389	0.8	10910	3.9	118.8	257	101.3	0.462257	0.222412	-2.28443	0.634377
	Zircon-85	0	9.85	-1e-06	0.15	0.38	0.244	2.84	1.34	22.1	9.7	55.6	185	46.5	190	3.9	312	1.12	12490	23.225	34.8	211.7	153	0.164384	0.058549	-2.21795	0.717772
	Zircon-86	0.021	6.31	0.022	0.51	1.26	0.47	8.3	2.93	39.4	16.7	82.1	206	49.5	370	42	525	0.82	10260	1.7675	45.6	93.3	121.3	0.488746	-0.343986	-2.40005	0.444141
	Zircon-87	0	17.5	0.177	3.18	6.2	1.56	27.1	8.7	no value	38	174	362	77.1	360	6.7	1160	1.66	10480	3.725	232	319	103.3	0.727273	-0.054918	-2.3386	0.367783
	Zircon-88	0	1.96	-1e-06	0.16	0.31	0.047	3.32	1.3	16.7	7.27	35.5	85.9	20.2	30	1.43	234	0.56	13210	3.86	39.9	262	75.3	0.15229	0.484308	-2.18581	0.141578
	Zircon-89	7.6	76	2.2	11.1	6.2	1.42	27.1	10.16	131.1	53.3	261	543	115.9	1460	6.9	1646	6.45	8750	3.7	154	147	122.2	1.04762	-0.567482	-1.92524	0.334777
	Zircon-91	0.04	4.07	0.097	1.84	4.44	0.234	23.1	8.34	102.5	37.6	164.8	292.9	60.8	960	22.8	1078	0.92	12320	7.25	85.8	300	143.6	0.286	0.010402	-2.50293	0.07061
	Zircon-92	0.42	4.24	0.229	2.59	5.56	0.73	27.4	8.8	100.3	37.9	166	276	55.6	670	32.7	1044	0.6	8680	1.9625	41.4	98.7	146	0.419453	-0.446592	-2.66276	0.180741
	Zircon-93	0	5.56	0.0101	0.57	1.46	0.219	10.09	3.84	45.7	18.81	93.1	208.3	48.5	190	5.3	601	1.21	13070	8.425	117.8	545	92	0.216147	0.417707	-2.2359	0.174369
	Zircon-94	4.38	36.1	3.17	20.4	9.5	1.21	34.2	12.73	171.4	74.3	370	804	168.5	7390	3.5	2216	15.7	13510	13.675	176	912	268.7	0.192982	0.054739	-1.70936	0.205144
	Zircon-95	0.225	56.1	0.237	2.5	4.68	0.86	27.9	10.52	129.7	54.2	268	613	135.4	860	2.9	1727	6.9	12730	24.975	1050	2150	133.1	0.488372	0.544978	-1.94861	0.229996
	Zircon-96	0.039	48	0.275	5.16	7.9	1.4	42.6	15.1	182	71.8	344	718	154	680	5.2	2250	5.28	10580	22.25	1190	1860	126.6	0.639785	0.413388	-2.13349	0.233215
	Zircon-97	13.7	46	5	25.6	10.4	0.88	33.9	11.2	135.8	52.8	241.4	448	91.5	2520	1.34	1562	1.83	11440	6.6375	179.1	421	77.2	0.425416	-0.026996	-2.38883	0.143223
	Zircon-98	0.6	34.5	0.68	9.6	14.3	3.54	58.5	18.1	196	69.6	310	602	131	800	6.4	2140	1.83	8970	13.225	813	833	131.9	0.97599	0.141049	-2.51715	0.374029
	Zircon-99	0.011	22.4	0.145	2.5	3.5	1.36	16.3	5.63	67.2	25.7	122.1	291	68.3	360	3.1	817	1.79	12260	5.85	240	434	95	0.552995	0.173597	-2.21104	0.550248
	Zircon-100	0	8.3	0.016	0.33	0.45	0.1	4.2	1.22	17.8	6.6	35.5	93.7	26.1	200	4.2	212	1.19	12390	12.35	23.2	447	94.1	0.051902	0.678568	-1.89619	0.222288
	Zircon-101	0.75	15.2	0.27	1.26	1.34	0.606	8.06	3.06	39.1	17.42	89.6	248	61.1	1020	2.29	556	1.76	11560	2.1825	41.6	141.6	88.7	0.293785	-0.243388	-2.14894	0.563508
	Zircon-102	1.1	38.7	0.46	4.28	4.41	1.38	30.7	10.93	135.5	55	266	581	129.5	1040	2.9	1729	5.66	10870	17.35	517	1158	141.3	0.446459	0.299532	-2.01136	0.362442
	Zircon-103	0	5.7	0.034	1.01	1.65	0.556	10.06	3.29	36.2	12.32	54	107.1	23.24	10	1.86	400	0.772	10520	3.0075	50.1	216.9	91.6	0.230982	0.30647	-2.14217	0.417043
	Zircon-104	0	3.75	0.003	0.212	0.64	0.162	4.6	1.79	22.31	8.92	42.7	90.1	20.44	610	5.3	276	0.397	11200	1.2975	27.3	82.5	91.3	0.330909	-0.038271	-2.35593	0.288532
	Zircon-105	0	6.63	0.135	2.81	4.98	0.315	25.2	8.95	102.4	37.4	165	282	54.4	1370	24.2	1071	3.64	11520	18.25	67.8	72.3	86.5	0.937759	-0.591111	-1.88915	0.08593
	Sample: Yaq-26-4 (EL Salto Formation sandstone)
	Zircon-01	1e-06	3.49	0.0011	0.165	0.54	0.28	3.14	1.28	14.2	6.1	31.7	87	21	-30	2.1	214	0.72	0.72	1.22	36.2	75	52.1	0.482667	-0.064458	-2.08219	0.657119
	Zircon-02	0.0053	8.14	0.059	1.62	4.45	0.77	22.7	7.15	80	30.3	137	305	63.3	120	0.36	939	1.41	1.41	11.1	216	715	64.4	0.302098	0.370006	-2.33508	0.234124
	Zircon-03	3.7	12.4	0.73	3.43	1.65	0.427	7.5	2.44	30.6	12.1	60.6	153	33.9	520	0.38	404	1.23	1.23	5.625	79.1	361	55.2	0.219114	0.372816	-2.09479	0.370939
	Zircon-04	1e-06	3.01	0.02	0.41	1.3	0.61	7.66	2.58	30.2	11.4	49.6	94.8	19.3	-70	17.2	335	0.86	0.86	0.09025	8.38	15.1	95.9	0.554967	-0.797831	-2.04231	0.590733
	Zircon-05	1e-06	0.93	0.0021	0.245	0.34	0.161	2.57	0.92	12.9	5.74	31.4	91.8	23	-80	2.5	196	0.675	0.675	3.75	52.5	150	44.7	0.35	0.213249	-2.13354	0.526341
	Zircon-06	0.146	20.9	0.158	1.88	3.95	1.82	19.7	6.42	75.7	29.8	142	320	74	290	12	919	1.19	1.19	4.9	207	323	63.1	0.640867	0.004053	-2.4296	0.630503
	Zircon-07	1e-06	4.84	0.0076	0.293	0.87	0.16	6.9	2.32	28.8	11.34	53.7	114	23.6	130	10.2	360	0.99	0.99	0.8425	25.3	54.7	69.6	0.462523	-0.318918	-2.06127	0.199564
	Zircon-08	1e-06	2.61	0.0012	0.116	0.244	0.158	2.06	0.94	11.9	5.43	27.6	70.3	16.7	120	2.9	176	0.507	0.507	0.61	15.1	36.8	49.1	0.410326	-0.281108	-2.14195	0.681045
	Zircon-09	0.011	7.42	0.043	0.69	1.75	0.56	12.3	3.91	48	17.8	82	176	37.5	-160	4.8	566	1	1	2.825	97.2	186	75.1	0.522581	0.024	-2.24551	0.368862
	Zircon-10	1e-06	7.23	0.033	0.71	1.27	0.39	8.99	2.99	35.9	14.2	65.8	147	32.3	-10	5.4	447	1.01	1.01	2.4375	69.8	157	76.1	0.444586	0.028582	-2.163	0.35272
	Zircon-11	145	252	24.6	77	13.8	2.2	35.8	10.07	107.9	38.9	166	300	59.1	160	8.5	1163	0.93	0.93	2.38	120	143	73.7	0.839161	-0.321785	-2.50864	0.302475
	Zircon-12	2.39	23.1	0.64	3.05	2.57	0.55	13.5	4.68	52.2	20.3	95.8	223	49.6	290	15.2	658	1.54	1.54	7.525	149	516	71.3	0.28876	0.364345	-2.16078	0.285349
	Zircon-13	0.013	42.7	0.012	0.89	3.02	0.216	19.9	8.4	111	47.7	235	525	114	300	4.3	1520	13.4	13.4	5.4	430	1000	85.7	0.43	0.279841	-1.59306	0.085147
	Zircon-14	1e-06	6.8	0.03	0.43	1.25	0.37	7.4	2.66	32.4	13.2	61.5	140	32.1	170	5.1	421	0.96	0.96	0.6775	61	125	76.6	0.488	-0.049218	-2.16386	0.371773
	Zircon-15	0.0055	4.76	0.041	0.87	1.93	0.343	9.71	3.39	40	16.6	79.4	189	44.5	30	1.8	541	1.04	1.04	8.25	164	566	71.8	0.289753	0.476355	-2.25943	0.242133
	Zircon-16	1e-06	11.3	0.025	0.53	1.21	0.341	7.3	2.37	28.6	11.8	57	144	33.3	20	2.5	394	1.2	1.2	1.9825	94	174	56.4	0.54023	0.082187	-2.07918	0.350629
	Zircon-17	0.052	11.9	0.08	1.51	3.11	1.13	13.7	4.34	47.2	17.6	78.1	167	38.2	240	82	565	1.11	1.11	4.525	191	309	74.8	0.618123	0.267242	-2.17739	0.529036
	Zircon-18	1e-06	30.1	0.084	1.95	3.25	0.79	24.8	9	108	43.6	204	409	85.2	-80	2.1	1330	5.79	5.79	12.45	291	497	89.7	0.585513	0.084633	-1.84905	0.26891
	Zircon-19	16.2	58.8	4.93	26.5	7.9	0.154	23.2	7.49	89.1	34.7	156	298	60.6	580	6.7	1046	6.54	6.54	6.85	160	321	61.4	0.498442	0.032289	-1.65864	0.034762
	Zircon-20	0.048	4.04	0.093	2.26	5.89	0.419	32.1	10.4	113.2	38.8	161	281	56.7	250	2.7	1140	1.58	1.58	8.4	184	574	108.6	0.320557	0.310206	-2.25005	0.093122
	Zircon-21	0	6.2	0.081	1.88	4.29	0.722	25.1	8.57	95.6	37	164	294	60.6	70	5	1103	0.67	0.67	1.62	49	88	87.3	0.556818	-0.523865	-2.64227	0.212627
	Zircon-22	0	13.9	0.114	2.49	5.09	0.946	26.8	9.03	99.3	37.3	161	310	63.5	-10	4	1102	1.14	1.14	4.775	215	329	92.5	0.653495	0.025834	-2.43446	0.247521
	Zircon-23	0	18.5	0.022	0.49	1.36	0.229	9.54	3.71	45.2	19.4	96.9	239	54.2	90	2.9	628	1.78	1.78	12.8	335	857	64	0.390898	0.554583	-2.12798	0.194285
	Zircon-24	0.75	8.4	0.17	1.71	1.42	0.499	7.15	2.16	27.1	10.7	52.4	128	31.4	30	4.5	352	0.76	0.76	1.6975	48	94	73.7	0.510638	-0.134082	-2.2264	0.478576
	Zircon-25	0	6.8	0.0136	0.42	0.86	0.331	5.04	2.16	26.2	11.2	56.6	145.5	35.8	90	2.8	366	1.07	1.07	2.73	90.5	227	74.8	0.398678	0.193163	-2.13348	0.48586
	Zircon-26	0.076	55.9	0.116	2.13	6.69	0.802	50.6	19.2	236	94.3	431	814	165	480	2.4	2800	4.28	4.28	3.75	520	742	98.9	0.700809	-0.04022	-2.27918	0.133209
	Zircon-27	0	36.9	0.032	0.73	2.88	0.38	21.7	8.69	115	47.1	226	458	95.1	440	3.6	1440	7.7	7.7	3.475	381	691	89	0.551375	0.178613	-1.77438	0.146894
	Zircon-28	0	21	0.091	1.71	4.18	1.4	25.4	8.99	115.9	49.2	238	534	119	200	4	1510	1.8	1.8	1.23	160	243	83.4	0.658436	-0.341935	-2.47227	0.415213
	Zircon-29	0.11	49.8	0.092	1.35	3.38	0.57	25.8	10.03	127	53	255	524	108.8	120	3.5	1660	5.67	5.67	1.835	248	364	55.1	0.681319	-0.15823	-1.96575	0.186532
	Zircon-30	0	21.4	0.091	1.64	3.75	1.56	23	8.21	103.4	41.7	202	456	100.8	260	3.3	1294	1.4	1.4	1.085	145	209	95	0.69378	-0.338819	-2.51284	0.513325
	Zircon-31	0.74	11.3	0.37	3.41	5.31	1.2	22.4	7.13	77.2	28.3	116.5	213	44.2	60	6.5	838	1.04	1.04	1.0975	60.9	91	76.9	0.669231	-0.369338	-2.31135	0.336246
	Zircon-32	0	6.12	0.024	0.5	1.15	0.437	6.5	2.53	32.6	14.46	70.3	183	44.4	220	2.5	442	1.05	1.05	3.35	84	222	86.3	0.378378	0.083902	-2.24126	0.488454
	Zircon-33	0.044	10.72	0.086	1.15	1.84	0.586	9.77	3.29	40.8	16.6	85.3	222	54.8	410	1.1	552	1.27	1.27	6.8	260	531	71.5	0.489642	0.378742	-2.24255	0.422366
	Zircon-34	0	7.61	0.131	2.09	4.65	0.95	27.4	9.11	113.5	45.6	212	414	86.7	150	3.6	1352	1.18	1.18	6.875	149	285	102.1	0.522807	-0.162155	-2.54512	0.257199
	Zircon-35	0.015	14.5	0.302	5.41	7.81	3.4	38.4	12.3	133.3	50.7	216	399	83.1	100	9.7	1440	1.09	1.09	2.2	199	186	101.2	1.06989	-0.33146	-2.56355	0.599978
	Sample: Yaq-26-11 (EL Salto Formation sandstone)
	Zircon-01	0	6.17	0.0128	0.68	1.62	0.677	10.2	3.4	41.6	16.05	75.4	185.4	45.9	210	2.7	516	0.515	0.515	1.265	36.9	72.2	79.8	0.51108	-0.409573	-2.5563	0.508954
	Zircon-02	0	2.43	0.097	1.98	3.73	1.03	22.3	7.58	94.5	40.8	198	453	100.9	-140	1.17	1273	0.587	0.587	6.075	136.9	292	50.6	0.468836	-0.190715	-2.88746	0.345126
	Zircon-03	10.1	112	8.11	44.8	26.7	20.3	47.7	14.4	141.3	53.5	266	879	233	1410	160	2180	1.61	1.61	51.5	333	5410	548	0.061553	0.789208	-2.73716	1.73832
	Zircon-04	0.143	13.16	0.115	1.67	3.8	0.84	20.3	7.04	84	33.1	151	307	64.7	230	880	995	3.6	3.6	3.325	134	215	91	0.623256	-0.1547	-1.93084	0.292272
	Zircon-05	3.2	31.4	0.75	4.2	3.28	0.416	18.3	6.71	84	33.3	151.9	286	60.3	840	9.3	972	2.73	2.73	5.3	153.4	188	94	0.815957	-0.182208	-2.0202	0.164089
	Zircon-06	0	43.4	0.032	0.8	1.88	0.434	11.93	4.33	55.2	23.4	116.1	264	57.1	230	8	691	5.64	5.64	41.375	117	137.1	67.5	0.853392	-0.284566	-1.67033	0.280052
	Zircon-07	2	13.6	0.64	3.9	3.05	0.69	13.4	4.52	53.1	21.1	102.8	214	47.3	730	3.9	645	1.25	1.25	2.41	96	187	68.6	0.513369	-0.058572	-2.2335	0.329833
	Zircon-08	0	30.4	0.065	1.21	3.72	0.744	22.4	7.98	105.3	42	197	407	85.3	290	5.8	1244	2.06	2.06	1.1175	149	200	89.7	0.745	-0.308564	-2.29573	0.249072
	Zircon-09	0.0102	9.04	0.312	5.26	8.41	2.49	42.5	13.17	143.5	53.6	232.2	448	93	-40	5.5	1573	1.1	1.1	6.325	254	403	63.4	0.630273	-0.045973	-2.60988	0.402489
	Zircon-10	0.047	19.7	0.365	6.57	8.47	3.63	34.1	10.33	104.7	35.7	153.9	296	62.3	10	11.3	1063	1.75	1.75	2.0675	158	157.2	98	1.00509	-0.274839	-2.22825	0.652732
	Zircon-11	0.025	8.29	0.048	0.93	2.29	0.6	9.47	3.12	38.3	15.4	70.5	161	36.8	40	3.3	487	1.16	1.16	2.7625	67.9	209	91.6	0.32488	0.11332	-2.14237	0.393737
	Zircon-12	0	4.97	0.025	0.36	0.94	0.243	5.92	2.14	27.1	12.11	59.3	145.6	35.3	10	2.3	377	0.82	0.82	2.895	55.8	193	64.3	0.289119	0.122396	-2.24935	0.314796
	Zircon-13	8.1	27.8	2.21	12.1	4.21	1.29	16.3	4.68	53	20.6	96	232	54	2140	3.9	634	0.59	0.59	1.66	55.3	89.1	84.4	0.620651	-0.41561	-2.59464	0.475885
	Zircon-14	-1e-06	19.4	0.017	0.48	2.06	0.59	11.5	4.97	63.2	28.8	147	366	87.4	630	2.3	896	1.61	1.61	1.365	138	222	92.5	0.621622	-0.217128	-2.35665	0.370439
	Zircon-15	0.84	8.5	0.2	1.54	1.56	0.341	7.17	2.48	30.8	12.8	62.5	147	33.8	250	3.8	409	0.86	0.86	3.725	109	243	75.2	0.44856	0.218289	-2.23282	0.311587
	Zircon-16	-1e-06	9.88	0.056	1	2.33	0.528	12.43	4.61	55.1	20.55	90.6	170.2	35.2	-60	14	616	1.37	1.37	1.06	53.6	99	121.5	0.541414	-0.235324	-2.09424	0.299825
	Zircon-17	-1e-06	7.58	0.019	0.37	1.33	0.32	8.12	3.1	36.5	14.44	65.5	123.4	26.2	150	14.6	435	1.14	1.14	0.98	38.2	89.5	98.4	0.426816	-0.139492	-2.03441	0.297573
	Zircon-18	-1e-06	8.09	0.014	0.54	1.87	0.501	15.9	5.37	72.4	30.1	142.1	299	65	480	6.8	892	0.63	0.63	1.69	79.2	145	86.2	0.546207	-0.314303	-2.67633	0.28078
	Zircon-19	167	211	15.9	52	7.2	1.65	13.9	3.06	34.1	12.8	64	156	39	32000	10.9	408	1.02	1.02	3.275	158	315	62.3	0.501587	0.305186	-2.18452	0.504032
	Zircon-20	0.044	15.8	0.061	0.44	0.39	0.28	2.74	0.83	12.6	5.5	32.3	117	34.4	280	2.9	215	1.18	1.18	5.5	155	495	63.1	0.313131	0.626419	-1.9963	0.827748
	Zircon-21	-1e-06	6.15	0.02	0.55	1.24	0.277	8.8	3.16	36.6	15.7	70.7	138	29.8	220	9.5	454	0.79	0.79	2.49	28.7	99.2	68.6	0.289315	-0.143367	-2.24225	0.256257
	Zircon-22	-1e-06	1.82	0.0155	0.39	1.59	0.087	10.7	4.04	48.2	19	83.4	146	30.5	730	7	554	0.774	0.774	2.235	35.9	139.9	84.6	0.256612	-0.018535	-2.27561	0.064458
	Zircon-23	-1e-06	42.1	0.068	1.96	3.84	1.01	22.6	7.79	104.5	45.6	228	565	131.4	210	1.5	1440	2.66	2.66	2.47	395	453	81.8	0.871965	-0.09595	-2.32717	0.331321
	Zircon-24	-1e-06	12.47	0.032	0.85	2.5	0.43	17.1	5.73	68.5	26.4	113.6	213.3	43.6	1360	10.2	784	1.54	1.54	1.7175	125.5	172.8	108.7	0.726273	-0.091447	-2.14147	0.200978
	Zircon-25	0.067	2.9	0.12	1.94	4.38	0.326	21.2	6.73	78.6	30	135.7	267	56.8	700	4.3	902	0.742	0.742	4.125	94	255	82.8	0.368627	-0.019971	-2.55611	0.103386
	Zircon-26	-1e-06	6.01	0.069	1.76	4.93	0.93	32.1	10.95	127.5	49.5	221.5	391	81	110	7	1444	0.635	0.635	2.08	72.8	116.2	107.6	0.626506	-0.526971	-2.7894	0.22592
	Zircon-27	-1e-06	12.17	0.071	1.65	4.55	0.99	25.7	8.84	102	39.5	174.9	328	68.1	-860	5.1	1118	0.9	0.9	1.9875	88.2	133.5	93.4	0.660674	-0.390393	-2.56163	0.279776
	Zircon-28	0.51	26.3	0.211	2.32	3.52	0.99	16.2	5.27	58.9	22.4	102.1	227	53.3	1160	3.3	708	1.51	1.51	3.925	268	323	55.4	0.829721	0.153177	-2.17705	0.40064
	Zircon-29	-1e-06	11.62	0.093	1.84	4.83	0.84	25.9	8.49	92.4	33.7	142.6	248	49.6	300	8.7	988	1.18	1.18	1.82	107	152.1	93.1	0.703485	-0.212322	-2.32257	0.229511
	Zircon-30	-1e-06	16.79	0.051	1.34	2.63	0.57	16.3	5.47	62.8	24.7	108.6	224	45.6	320	8.6	739	0.97	0.97	2.54	196	232	73.4	0.844828	0.01524	-2.36348	0.266042
	Zircon-31	-1e-06	10.51	0.02	0.67	1.6	0.468	10.35	4.11	49.4	21.2	102	224	49.1	1070	6.4	671	1.3	1.3	5.075	115.3	311	82.4	0.37074	0.142512	-2.23631	0.35145
	Zircon-32	0.161	12.75	0.224	3.27	4.37	2.24	21	6.86	76.3	28.6	124.8	235.3	51	-500	36.3	820	0.78	0.78	0.85	43.7	33.1	87.7	1.32024	-0.851794	-2.47953	0.714571
	Zircon-33	9	43	2	10.3	7.2	1.22	30.4	9.2	103	36.1	157	299	64.1	6400	35	1050	1.75	1.75	3.175	289	270	76.8	1.07037	-0.044307	-2.23263	0.252002
	Zircon-34	32	98	9.5	43	12.7	2.19	30.3	8.46	85.8	31.1	130	233	48.1	14900	6.4	906	0.98	0.98	1.075	82.5	93.4	92.6	0.883298	-0.397009	-2.37613	0.341168
	Zircon-35	0.0029	12.8	0.107	1.74	2.81	1.02	15.9	5.18	63.1	24.4	117	270	61.8	-1300	2.6	780	0.83	0.83	4.675	241	332	84.5	0.725904	0.089774	-2.51229	0.466333
	Zircon-36	-1e-06	15.71	0.051	0.98	2.3	0.714	16.5	5.74	66.1	25.5	114.3	233	48.8	500	5.8	772	1.29	1.29	4.325	194	354	69.4	0.548023	0.181647	-2.25677	0.354193
	Zircon-37	1.02	11	0.33	3.54	3.94	1.055	16.98	5.37	58.7	22.25	102	224.6	51.1	1800	3.3	679	0.75	0.75	4.635	148.3	311	81.7	0.476849	0.141351	-2.47635	0.394169
	Zircon-38	-1e-06	7.76	0.0159	0.44	1.72	0.22	12.91	5.32	68	27.7	131.8	265	57.3	1200	3.4	810	1.85	1.85	4.085	81.5	240	90.6	0.339583	-0.043035	-2.15607	0.142673
	Zircon-39	-1e-06	10.49	0.053	1.06	2.63	0.77	14.3	4.22	45.1	15.5	63.4	108	21.9	1500	20.2	466	1.04	1.04	1.42	66.9	92.4	62.6	0.724026	-0.067752	-2.01639	0.3837
	Zircon-40	-1e-06	1.91	0.057	1.39	3.44	0.203	23	8.09	91.9	37.8	172	329	70.1	3800	3.5	1024	1.3	1.3	2.38	61.7	145	223	0.425517	-0.355828	-2.40325	0.069743
	Zircon-41	0.036	7.9	0.114	2.44	4.39	1.06	21.2	6.32	58.8	19	75.8	141	30.2	5100	1.4	581	0.72	0.72	5.875	140	376	76.3	0.37234	0.425969	-2.29189	0.335779
	Zircon-42	0.58	14.75	0.201	1.85	2.39	0.64	11.8	4.15	50.7	20.1	100	218	50.6	6700	354	640	2.3	2.3	3.8	160	286	85.5	0.559441	0.11791	-1.97673	0.368288
	Zircon-43	0.76	51.2	0.48	2.34	4.11	0.78	25.1	9.6	123	50	228	468	99	2700	5.5	1490	3.27	3.27	1.925	222	332	64.3	0.668675	-0.149108	-2.1557	0.234684
	Zircon-44	-2e-06	8.37	0.064	0.94	3.21	0.618	17.7	6.32	75.8	30.2	133.7	250	51	600	7.2	899	0.68	0.68	1.3825	53.4	81.1	66.7	0.658446	-0.488919	-2.56543	0.250551
	Zircon-45	0.175	18.1	0.131	2.1	3.14	1.14	16.2	4.76	48.4	17.4	74	151	34	2800	1.2	561	1.44	1.44	1.6425	145	149	59.7	0.973154	-0.005791	-2.02061	0.488461
	Zircon-46	-2e-06	23.4	0.115	3.44	5.38	1.46	24	7.55	79.5	30.9	144	320	71	5200	2.9	961	1.69	1.69	4.325	370	378	68.7	0.978836	0.072342	-2.27726	0.392648
	Zircon-47	-2e-06	9.79	0.075	1.65	1.98	0.74	10.7	3.32	35.2	13.4	60.5	130.7	29.8	20000	15	431	1.03	1.03	0.97	57.2	86.6	57.3	0.660508	-0.178758	-2.10344	0.491309
	Zircon-48	0.0047	16.7	0.105	1.97	5.24	0.514	31.9	11.88	137.7	53.1	231	394	78.7	35000	11.8	1613	1.04	1.04	8.75	293	390	86.5	0.751282	-0.004432	-2.57846	0.121493
	Zircon-49	-2e-06	22.23	0.04	0.99	2.62	0.539	18	6.82	91.9	38.9	198.5	468	106.8	-10000	3.3	1208	5.86	5.86	11.325	302	919	126.2	0.328618	0.29307	-1.90235	0.239855
	Zircon-50	-2e-06	5.77	0.024	0.76	1.55	0.53	8.99	3.25	43.1	17.9	89.3	223	54.1	800000	4	562	0.58	0.58	4.725	93.3	215	91.5	0.433953	-0.015866	-2.58488	0.433888
	Zircon-51	1.77	20.1	0.75	6.2	7.1	0.42	36.5	12.8	146	52.5	229	406	82	-84000	5.6	1660	2.07	2.07	6.85	202	395	89.9	0.511392	-0.011929	-2.29256	0.07973
	Zircon-52	0.016	73.2	0.545	9.12	14.5	4.74	65.1	20.6	217	78.8	333	615	122.5	50000	5.6	2270	3.75	3.75	5.5	419	371	96.5	1.12938	-0.219501	-2.21484	0.471467
	Zircon-53	0.013	15.5	0.091	2.03	3.14	1.17	14.7	4.81	56.9	21.9	109.2	258	61.4	-18000	5.4	719	1.46	1.46	3.7	159	269	74	0.591078	0.018133	-2.24727	0.526271
	Zircon-54	0.0022	5.26	0.097	2.34	5	1.15	35	12.68	152.2	55.1	236	418	85.4	-11000	5.7	1591	0.83	0.83	5.145	140.8	282	98.7	0.499291	-0.170927	-2.7021	0.26566
	Zircon-55	0.83	35.7	0.29	2.65	3.7	1.25	17.3	5.87	65.7	24.9	117.9	277	65.5	-13000	3.4	823	2.77	2.77	6.35	272	519	86.7	0.524085	0.272688	-2	0.477456
	Zircon-56	-2e-06	7.44	0.014	0.41	1.19	0.364	8	2.78	34.1	14.3	73.6	177	41.6	-1500	1.4	456	0.8	0.8	3.45	103.7	227	67.1	0.456828	0.108053	-2.34488	0.360521
	Zircon-57	0.0047	13.6	0.071	1.22	1.88	0.66	9	3.07	38.3	15.3	77.4	196	46.5	4500	5.4	509	1.29	1.29	2.8025	104	236	76.3	0.440678	0.080656	-2.18167	0.490333
	Zircon-58	-2e-06	31	0.176	3.82	6.57	2.91	34.7	10.35	117.3	44.5	195.4	339	67.6	1000	22.6	1319	2.31	2.31	0.9825	339	243	145.3	1.39506	-0.144593	-2.16659	0.58897
	Zircon-59	0.79	19.7	0.34	3.55	5.47	1.87	23.8	7.2	82.4	29.9	139	296	65.3	3600	10.3	949	1.18	1.18	2.435	174.4	254	69.2	0.686614	-0.066458	-2.39941	0.500849
	Zircon-60	-2e-06	19.8	0.053	0.9	1.67	0.98	10.5	3.37	36.2	13.79	64.2	160.2	40.7	8800	2.2	463	1.47	1.47	7.725	196	611	96	0.320786	0.581379	-2.03735	0.715189
	Zircon-61	-3e-06	14.46	0.151	3.5	5.61	1.69	24	7.7	87.1	32.1	150.7	327	73.3	5700	4.3	1031	1.38	1.38	5.125	314	370	84.6	0.848649	0.053654	-2.37467	0.445089
	Zircon-62	1.28	5.8	0.62	4.1	4.76	0.234	26.1	9.31	115.7	44.2	202	386	81.5	-13400	0.9	1261	1.68	1.68	6.625	125	394	156.5	0.317259	0.008909	-2.36128	0.064156
	Zircon-63	0.071	13.3	0.268	4.5	10.1	1.31	54	17.7	203	73	313	557	112	-4700	4.7	2250	3.91	3.91	16.375	660	1150	143	0.573913	0.314843	-2.15368	0.17142
	Zircon-64	0.094	16.33	0.077	1.23	1.57	0.737	10.19	3.89	51.8	22.56	117.9	299	73.4	-13700	5.8	748	1.91	1.91	5.5675	206.3	408	116.9	0.505637	0.134989	-2.19464	0.56309
	Zircon-65	-2e-06	17.34	0.053	1.39	2.41	0.373	12.52	4.01	48	17.43	80.6	170.8	35.6	-3000	21.1	532	1.67	1.67	3.5375	80.9	123	62.6	0.657724	-0.142583	-2.00977	0.207513
	Zircon-66	-2e-06	9.18	0.0068	0.5	1.48	0.418	8.89	3.06	36.8	13.65	64.8	129.6	28.8	-10000	3.7	428	0.876	0.876	2.505	63.5	157.1	70.5	0.404201	0.083571	-2.1701	0.352162
	Zircon-67	-4e-06	5.11	0.03	0.76	1.68	0.31	12.4	4.65	57	22.4	103.7	215.6	48.9	-17000	5.7	683	0.98	0.98	6.575	98.9	422	87.4	0.23436	0.291664	-2.34242	0.20756
	Zircon-68	0.194	21.5	0.33	4.52	6.25	1.27	25.6	9.2	96.6	31.9	139	259	53.1	-90000	21.7	950	2.93	2.93	3.775	19	49.2	140	0.386179	-0.721335	-1.94643	0.306825
	Zircon-69	-2e-06	1.39	0.002	0.024	0.027	0.054	0.97	0.467	7.23	4	28	102.4	29.1	-40000	1.5	165.1	0.73	0.73	16.575	17	353	33.2	0.048159	0.537475	-2.14698	1.0197
	Zircon-70	6.5	19.4	2.4	12.2	2.14	0.35	2.23	0.346	3.52	1.28	7.23	23.7	6.77	-130000	40	48.6	0.41	0.41	2.595	16.6	179	13.5	0.092737	0.878105	-1.76196	0.489617
	Zircon-71	0.36	13.9	0.103	1.62	2.2	0.79	13.2	4.39	52.8	21.8	111.4	269	65.2	200000	5.2	719	1.28	1.28	6.725	238	483	93.5	0.492754	0.254195	-2.32254	0.447998
	Zircon-72	5.9	14.9	1.5	7.8	2.6	0.47	9.2	2.66	26.7	9.81	42.1	86.7	20	410000	0.78	320	0.5	0.5	4.075	58.5	251	64.7	0.233068	0.461655	-2.23905	0.293673
	Zircon-73	0.013	10.37	0.059	0.9	1.74	0.72	9.1	3.25	38.2	15.57	78	188	44.2	25000	4.9	506	0.78	0.78	3.475	90.2	228	82.1	0.395614	0.083777	-2.38206	0.552948
	Zircon-74	0.084	20.32	0.198	3.42	6.13	2.17	26.5	7.45	76.9	27.2	121.8	257.1	59.3	60000	3.7	874	1.05	1.05	5	276	312	99.5	0.884615	0.084053	-2.38891	0.5203
	Zircon-75	-3e-06	8.4	0.065	1.09	2.72	0.63	14.3	5.14	59.3	21.7	100.1	203	43.7	-20000	7.7	678	0.86	0.86	2.015	84	158.4	104.3	0.530303	-0.107741	-2.373	0.308699
	Zircon-76	0.3	58.3	0.242	3.33	6.4	1.29	36.2	13.1	161	64.1	306	634	134	7700	3.5	1960	3.96	3.96	19.5	678	751	82.4	0.902796	0.073551	-2.20439	0.258996
	Zircon-77	-3e-06	37.1	0.089	2.34	4.04	1.79	20.9	6.41	74.5	27.9	124.9	247	51.6	3400	7.5	859	1.37	1.37	34.1	176.6	183.9	52.9	0.960305	-0.128115	-2.25598	0.595301
	Zircon-78	-3e-06	13.6	0.014	0.98	2	0.55	12	4.19	54	21.1	108	240	54.3	4900	7	690	1.03	1.03	1.3525	75	132	84	0.568182	-0.259637	-2.36737	0.343087
	Zircon-79	-3e-06	4.83	0.028	0.5	1.66	0.398	9.88	4	48.9	19.4	95.8	202	45.2	5200	6	612	0.574	0.574	0.5425	13.16	29.2	118.6	0.450685	-0.839969	-2.54644	0.30033
	Zircon-80	-3e-06	10.5	0.104	2.1	5.8	0.55	30.3	10.4	121	46.8	217	434	93.3	-1500	1.6	1470	0.95	0.95	15.8	479	950	64.4	0.504211	0.340234	-2.65977	0.126787
	Zircon-81	-3e-06	2.54	-1e-06	0.045	0.108	0.01	1.18	0.709	10.18	4.9	28.4	94.3	25.2	-4400	0.19	171.4	0.489	0.489	2.4525	33.8	144.7	47.1	0.233587	0.185957	-2.2852	0.085604
	Zircon-82	-8e-06	102	0.158	2.74	6.82	1.69	37.8	13	165	62.4	288	558	116.3	5000	6.6	1890	8.3	8.3	20.275	930	735	122.1	1.26531	0.119653	-1.82756	0.321659
	Zircon-83	-4e-06	5.64	0.0129	0.59	2.05	0.191	13.6	5.03	63.5	25.12	113.4	214.7	44	200	3.5	744	1.14	1.14	5.5	99.7	333	75	0.299399	0.190612	-2.27493	0.110544
	Zircon-84	-3e-06	13.2	0.01	0.43	1.46	0.32	9.3	3.89	48.2	19	81.2	151.7	32.2	2100	6.9	543	1.32	1.32	2.015	82.3	170	82.3	0.484118	0.049463	-2.06041	0.265387
	Zircon-85	-4e-06	12.98	0.116	2.6	5.65	1.01	31.4	10.29	114.5	39.6	164.5	272.4	53.9	800	8.5	1173	0.95	0.95	1.9	118.3	163.4	98.1	0.72399	-0.221955	-2.45748	0.231729
	Zircon-86	-3e-06	5.45	0.027	0.37	1.2	0.388	7.31	2.63	33.2	14.39	72.4	188.7	46.9	-1100	4	470	0.82	0.82	2.6	53.9	170.4	84.5	0.316315	-0.044302	-2.36196	0.400341
	Zircon-87	0.0019	3.48	0.365	6.18	10.15	2.1	38.4	11.19	111.9	38.5	165.8	322	73	2200	3.5	1209	0.91	0.91	4.4325	131.5	281	160.1	0.467972	-0.05915	-2.54881	0.325063
	Zircon-88	-4e-06	9.8	0.036	0.87	1.87	0.541	13.8	4.93	54.5	19.9	90.7	174.7	35.7	100	11.2	632	0.85	0.85	1.16	65	97.3	80.2	0.668037	-0.25418	-2.31287	0.32545
	Zircon-89	-4e-06	21.3	0.129	2.16	3.79	0.87	18.6	5.96	71.8	27.3	124.5	261	56.7	300	4.9	829	1.44	1.44	2.5725	129.7	220	90	0.589545	-0.074218	-2.25828	0.316658
	Zircon-90	-4e-06	2.33	0.107	2.37	6.03	0.47	41.5	14.81	178.2	64.9	275.5	447	86.5	3200	4	1893	2.23	2.23	4.9	96.5	306	277	0.315359	-0.164586	-2.302	0.090795
	Zircon-91	23.5	122	7.3	32	8.7	1.12	27.4	8.51	117	53.4	288	794	198	13600	5.4	1890	7.35	7.35	6.3	930	1211	164	0.76796	0.183324	-2.03353	0.221682
	Zircon-92	-4e-06	4.55	-1e-06	0.3	1.24	0.262	9.39	3.66	48.5	20.3	96.2	200.5	44	200	8.6	619	0.74	0.74	0.6075	15.44	33.8	86.4	0.456805	-0.773198	-2.43288	0.234642
	Zircon-93	-6e-06	5.42	0.009	0.34	1.17	0.402	11.7	4.59	62.2	25.4	121.3	254	54.6	-600	12.3	777	0.72	0.72	0.65	17.6	37	106	0.475676	-0.836632	-2.5475	0.332038
	Zircon-94	-4e-06	4.76	-1e-06	0.127	0.53	0.089	2.33	0.989	13.55	5.49	27.9	75.1	17.65	-1400	4.6	169.2	0.51	0.51	1.75	31.5	113.5	49.8	0.277533	0.179356	-2.16807	0.244749
	Zircon-95	-4e-06	0.89	0.035	0.81	2.8	0.029	21.5	8.44	113.2	46.4	218.1	420	88.8	2000	8.3	1362	1.65	1.65	8.5	67.5	309	232	0.218447	-0.133291	-2.40577	0.011422
	Zircon-96	18.8	68	5.4	24.7	7.4	0.447	21.3	7.03	90.8	35.7	174.7	372	81.2	4000	2.4	1120	5.23	5.23	15	299	645	79.8	0.463566	0.239017	-1.85204	0.108805
	Zircon-97	-4e-06	4.68	0.0128	0.49	1.31	0.314	10.11	3.86	49.9	21.04	103.1	237.7	53.6	-600	5	665	0.629	0.629	2.57	60.9	151.4	93.9	0.402246	-0.195903	-2.57738	0.263673
	Zircon-98	0.025	19.2	0.044	1.12	1.7	0.8	12.1	4.23	52.5	21.2	104.5	248	59.5	710	5.8	704	1.86	1.86	7.625	437	554	87.8	0.788809	0.349058	-2.12494	0.539039
	Zircon-99	3.6	27	1.36	7.9	7.6	2.51	35.1	11.31	129.7	49.1	213	379	79.2	4700	8.5	1448	1.19	1.19	0.695	111.1	130.5	124.4	0.851341	-0.463029	-2.50309	0.469635
	Zircon-100	-4e-06	1.37	0.079	1.23	3.35	0.209	20.4	7.74	95.7	35.2	156.5	272	55.5	1080	18.4	1052	1.06	1.06	2.675	35.2	102.5	174.6	0.343415	-0.423845	-2.40926	0.07726
	Sample: Yaq-46 (EL Salto Formation sandstone)
	Zircon-01	0.0029	25.4	0.032	0.76	2.23	0.84	16.6	6.1	79.9	32.7	164	393	87.9	410	-0.000273	1097	3.79	10100	1.325	209	416	­	0.502404	0.024701	-2.01575	0.42191
	Zircon-02	27.2	111	9.2	48	16.2	4.12	48.3	14.4	165	60.8	273	494	99.6	1500	6.2	1820	3.94	9780	0.255625	184	233	­	0.7897	-0.326371	-2.09823	0.450105
	Zircon-03	17.4	62.4	5.19	25.3	11.2	2.23	34.4	12.13	142.8	56.7	274	588	121.4	2200	6.5	1810	19.5	12160	6.3375	2800	2931	­	0.955305	0.697638	-1.47934	0.347188
	Zircon-04	1.24	11.6	0.44	2.83	6.4	0.6	35.4	12.4	148	55.6	240	429	87	1000	-0.000362	1620	2.32	10180	1.9625	137	401	­	0.341646	-0.029313	-2.26697	0.121817
	Zircon-05	1.46	61.8	0.82	6.11	7.02	2.28	34.7	11.8	124	44.1	195	388	84.4	-700	3.2	1430	4.71	10860	2.73125	799	865	­	0.923699	0.348184	-1.91581	0.446426
	Zircon-06	0.0096	3.86	0.036	1.07	3.54	0.193	28.8	11.74	158	63.3	293	557	109	1600	-0.000275	1900	2.85	11970	1.65	119	440	­	0.270455	-0.102403	-2.29101	0.058413
	Zircon-07	1.83	18.6	0.55	3.57	4.84	0.268	34.9	14.03	185	73.8	353	686	137.7	480	0.7	2320	9.72	13380	5.01875	557	2273	­	0.245051	0.520275	-1.84866	0.063015
	Zircon-08	0.012	17.9	0.089	1.77	3.79	0.92	21.5	7.08	76.7	27.8	127	268	57.2	1000	3.9	957	2.42	9940	3.2	428	961	­	0.445369	0.554589	-2.04432	0.311456
	Zircon-09	0.019	11.91	0.11	1.96	4.57	0.896	31.2	12.08	161.8	65.4	308	613	123.7	1400	10.5	1980	2.76	9700	12.9125	85	215	­	0.395349	-0.455022	-2.34655	0.229308
	Zircon-10	12.4	51.5	1.92	8.6	4.69	1.66	19.5	5.82	62.7	23.2	110.8	242	54.4	3520	1.9	794	2.95	8800	1.875	531	627	­	0.84689	0.413452	-1.91399	0.530459
	Zircon-11	2.05	51.1	1.07	10.9	14.5	4.2	56	15.8	156	49.7	212	374	75	-1700	24.1	1610	2.79	10600	2.23125	556	564	­	0.985816	0.178408	-2.12727	0.450421
	Zircon-12	0	5.47	0.035	0.66	1.55	0.341	8.99	3.03	30.1	10.35	43.8	86.7	18.97	-100	0.6	341	1.13	11070	1.425	120	386	­	0.310881	0.648568	-1.88494	0.279162
	Zircon-13	7.15	76	2.94	21.8	24.9	13.51	110	32.2	344	116.4	469	755	142.5	940	49.7	4120	3.34	7460	0.25375	296	195	­	1.51795	-0.587912	-2.3542	0.788872
	Zircon-14	0.33	29.9	0.226	2.79	4.88	1.05	27.9	9.87	120.6	47.5	221	421	86.5	920	2320	1508	11.5	7860	1.30625	431	492	­	0.876016	0.067683	-1.56358	0.274995
	Zircon-15	0.046	6.1	0.102	2.12	4.41	0.705	25.9	8.48	103.1	38.4	177	350	73.2	-400	1.8	1240	1.31	10310	2.1875	207	571	­	0.362522	0.212568	-2.4268	0.201589
	Zircon-16	0.0064	8.02	0.047	1.15	2.78	0.635	11.9	3.76	44.3	16.9	79.9	174	38	-570	0.8	551	0.98	10770	0.8375	103	228	­	0.451754	0.117386	-2.24932	0.337385
	Zircon-17	2.1	22.1	1.08	6.3	4.7	0.46	25.9	10.1	127	54.8	275	563	114	1100	0.5	1740	4.13	10400	2.7875	198	524	­	0.377863	-0.031177	-2.13456	0.127411
	Zircon-18	0.28	5.29	0.073	1.13	1.87	0.41	11.4	4.02	57.2	24.1	131	358	85	-200	13	804	1.58	9500	1.9625	142	447	­	0.317673	0.096424	-2.35523	0.271368
	Zircon-19	0.24	44.1	0.226	3.13	6.07	2.41	27.5	8.05	81.8	27.4	114	231	50.3	-370	6.5	876	3.19	9830	1.01875	504	334	­	1.50898	0.160134	-1.85982	0.570038
	Zircon-20	0	17.9	0.208	2.53	5.6	0.81	28.4	9.5	109	40	177	332	64.9	1000	5.2	1220	1.95	9430	0.95	289	377	­	0.766578	0.055203	-2.2311	0.196281
	Zircon-21	0.1	13.27	0.08	1.12	2.35	0.7	10.97	3.49	41.8	17.85	89.1	226	52.7	600	5	593	2.05	9720	0.653125	133	228	­	0.583333	0.003826	-2.04236	0.421316
	Zircon-22	0.5	54.4	0.9	13.9	23.5	7.15	102.8	32.2	352	123.9	525	920	178	1800	13.3	4600	5.77	7550	2.10625	823	693	­	1.18759	-0.123055	-2.20261	0.444552
	Zircon-23	20.5	54	5.1	20.9	4	0.82	10.2	3.11	37.2	14.9	73.4	183	43	3000	1.2	483	1.35	10470	1.1625	138	280	­	0.492857	0.184707	-2.13212	0.392312
	Zircon-24	3.1	16.8	1.1	5.8	3.56	0.53	14.2	4.32	46.3	15.9	70.5	131	26.9	2400	7.1	533	1.3	10530	0.95	101	222	­	0.454955	0.229082	-2.00333	0.2278
	Zircon-25	0	6.87	0.068	1.17	2.53	0.81	17.5	6.09	80.6	33.1	160.7	337	73.1	600	2.6	1045	1.27	7860	0.86875	46	137	­	0.335766	-0.390909	-2.42383	0.372009
	Zircon-26	0.143	19.7	0.113	1.89	3.55	1	19.9	7.72	101.8	42.3	213	481	105.9	500	2	1370	4.69	9210	2.45625	337	680	­	0.495588	0.150364	-2.01097	0.363586
	Zircon-27	0.0112	23.4	0.08	1.45	3.42	0.791	21.3	7.58	94.3	35.9	170.2	342	69.5	1240	12.9	1112	2.81	9330	7.4875	67	109	­	0.614679	-0.4966	-2.08532	0.283218
	Zircon-28	0.59	21.1	0.173	1.8	2.56	0.93	14.5	5.05	60.7	24.6	118.7	293	65.9	300	-0.00022	785	2	10820	1.00687	147	252	­	0.583333	-0.065467	-2.16584	0.466473
	Zircon-29	0	12.49	0.047	1.18	2.74	0.551	17.6	6.77	84.5	34	161.5	326	67.2	790	5.2	1070	1.79	8920	2.525	312	652	­	0.478528	0.30103	-2.26037	0.242475
	Zircon-30	3.3	25.4	0.74	3.51	2.16	0.65	10.59	3.48	42.2	16.9	83.2	188.7	41	1230	4.9	562	2.33	9170	0.8275	135	236	­	0.572034	0.09714	-1.90842	0.415323
	Zircon-31	1.24	42.3	1.18	14.1	19.8	7.14	86.8	25.3	268	97.3	410	794	155	-300	7.6	3390	3.09	7840	1.21875	485	448	­	1.08259	-0.248542	-2.40986	0.526324
	Zircon-32	0	4.41	0.0098	0.42	0.93	0.351	4.96	1.61	19.9	7.64	39.2	102	23.6	120	4.2	267	0.61	11550	0.13625	12	31	­	0.387097	-0.517238	-2.22327	0.499427
	Zircon-33	0	13.2	0.103	1.66	4	1.03	25.4	9.2	122	48.4	241	574	131	-600	3.1	1530	3.7	10600	4.4125	249	895	­	0.278212	0.192911	-2.19071	0.312275
	Zircon-34	3.4	26.9	0.85	4.09	3.4	0.91	14.3	5.98	81.6	33.2	172	442	92.3	2800	128	1028	2.89	11230	4.55625	68	670	­	0.101493	0.180653	-2.18452	0.398824
	Zircon-35	0.009	12.8	0.152	2.19	4.92	1.31	28	9.26	112	43.9	206	437	95.2	1600	2.8	1370	1.99	9450	1.71875	278	485	­	0.573196	0.04526	-2.34163	0.341081
	­ unmeasured
